# Supplementary material for: Two styles of Neoarchean slab subduction revealed by mantle oxygen fugacity
Source: Research Square preprint supplement (doi:10.21203/rs.3.rs-2820807/v1), 2023-05-02
Supplement: Supplementary file 1 [file 2fe845874fbf76e349e80e06.xlsx]

## Sheet: A. Whole-rock data
Sample No.	Belt	Location	Lithology	SiO2 (wt. %)	Al2O3	TFe2O3	CaO	MgO	K2O	Na2O	MnO	TiO2	P2O5	LOI	Mg#	V (ppm)	Nb	La	Yb	Age (Ga)	Reference	0.2 wt.% H2O	T (℃)	P (GPa)	fO2	2 wt.% H2O	T (℃)	P (GPa)	fO2	4 wt.% H2O	T (℃)	P (GPa)	fO2
17JD16-1	A	SEH	1-High Nb/La group	46.7311	14.7174	14.8585	11.2018	8.78412	0.0604412	2.23633	0.231691	1.11816	0.0604412	0.62	66.1429	352	1.69	2.03	1.83	2.56	Fu et al., 2021
17SD42-5	A	WS	1-High Nb/La group	49.28	15.14	13.13	10.53	8.2	0.17	2.17	0.17	1.13	0.08	1.32	59.2743	336	2.71	3.17	2.67	2.73	Gao et al., 2019		1484.75	2.21104	-0.979
17SD42-4	A	WS	1-High Nb/La group	49.635	14.7185	12.9287	10.319	8.54915	0.159984	2.26977	0.179982	1.14989	0.089991	1.79	60.6462	333	2.92	3.06	2.68	2.73	Gao et al., 2019		1472.6	2.07287	-1.287
XLH-1A	A	SNL	1-High Nb/La group	50	14.5582	11.6466	11.5462	8.50402	0.220884	2.74096	0.190763	0.542169	0.0502008	0.8	62.9858	275.6	1.69	1.64	1.8	2.56	Peng et al., 2015		1427.5	1.78089	-0.95
XLH-1C	A	SNL	1-High Nb/La group	50.8681	15.1284	10.3564	10.5594	8.94507	0.456899	2.98507	0.18276	0.477206	0.0406133	1.06	66.8095	251	1.54	1.43	1.83	2.56	Peng et al., 2015		1368.4	1.38841
2965-100	A	JD	1-High Nb/La group	46.0414	14.774	13.693	11.9016	8.93648	1.28694	2.26501	0.226501	0.823638	0.0514774	2.04	60.3325	301	2.32	2.35	2.32	2.5	Shan et al., 2015		1537.6	3.41907	-1.677
Z2967-66	A	JD	1-High Nb/La group	45.8504	14.7643	13.7193	11.8955	9.10861	1.29098	2.27459	0.22541	0.819672	0.0512295	2.08	60.7425	289	2.22	2.18	2.16	2.5	Shan et al., 2015		1538.98	3.46753	-1.802
Z2967-49	A	JD	1-High Nb/La group	46.6073	14.9524	12.7725	12.0766	9.2007	1.21789	2.33344	0.204687	0.593593	0.0409375	1.4	62.6696	253	2.07	2.1	2.18	2.5	Shan et al., 2015		1497.53	2.90935
T1018	A	WS	1-High Nb/La group	50.73	14.32	16.04	7.47	8.28	0.1	1.74	0.2	1.02	0.1	3	54.6079		2.8	2.73	2.56	2.73	Wang et al., 2013b		1573.67	2.74471
T1019-5	A	WS	1-High Nb/La group	48.36	14.9	15.22	8.57	9.18	0.1	2.04	0.2	1.33	0.1	2.1	58.4312		3.3	2.44	3.36	2.73	Wang et al., 2013b		1566.28	3.06358
6LB14-3	A	WS	2-Low Nb/La group	50.6101	13.5527	10.9722	14.3129	8.22164	0.280056	1.19024	0.170034	0.65013	0.040008	1.2	63.5871	272	0.87	3.21	2	2.78	Gao et al., 2019		1401.19	1.23464	-0.895		1360.79	1.29889
6LB14-2	A	WS	2-Low Nb/La group	50.29	13.23	11.86	12.25	9.12	0.41	2	0.17	0.63	0.04	0.82	64.1845	257	0.88	2.71	1.87	2.78	Gao et al., 2019		1436.91	1.69376	-1.507		1389.42	1.66862	-0.55		1343.08	1.65426	0.066
6LB08-7	A	WS	2-Low Nb/La group	51.2649	11.8588	13.3987	10.6289	9.28907	0.359964	2.21978	0.209979	0.709929	0.059994	0.65	61.7693	252	1.9	3.91	1.59	2.78	Gao et al., 2019		1488.56	2.00912	-2.263		1438.25	1.93976	-1.571		1388.7	1.88846	-0.959
6LB16-5	A	WS	2-Low Nb/La group	48.6949	15.0515	11.3211	12.0712	9.65097	1.15012	1.24012	0.160016	0.610061	0.050005	1.34	66.5181	244	1.22	3.63	1.69	2.78	Gao et al., 2019		1416.97	1.72879	-1.364		1375.18	1.73606	-0.448		1334.18	1.74727	0.094
17SD49-6	A	WS	2-Low Nb/La group	51.7077	14.9691	11.6145	10.1652	8.37134	0.243235	2.05736	0.172291	0.658762	0.0405392	1.22	62.6831		1.75	2.94	1.92	2.59	Gao et al., 2020		1409.83	1.38108			1369.25	1.41419			1324.82	1.41913
17SD49-11	A	WS	2-Low Nb/La group	49.373	15.3431	11.255	10.3069	10.3884	0.448568	1.98797	0.163116	0.683046	0.0509736	1.78	68.2647	254	2.16	3.89	1.71	2.59	Gao et al., 2020		1409.11	1.62403	-1.099		1366.38	1.63237	-0.345		1320.22	1.61556	0.288
17SD74-3	A	WS	2-Low Nb/La group	51.5946	10.7421	11.7546	11.0256	10.7624	0.769464	2.31852	0.22274	0.637845	0.172117	1.04	68.0897		8.99	36	2.95	2.53	Gao et al., 2020
17SD67-2	A	WS	2-Low Nb/La group	50.7154	11.2152	12.1423	11.0238	11.0943	0.695284	2.02539	0.201532	0.695284	0.191455	0.6	68.0446		4.6	17.3	1.36	2.53	Gao et al., 2020		1443.64	1.70088			1397.32	1.70003			1347.59	1.67351
17SD66-3	A	WS	2-Low Nb/La group	51.0091	10.3229	11.6852	10.444	13.0373	1.26135	1.26135	0.171544	0.585267	0.221998	0.66	72.2236		3.09	8.76	1.48	2.53	Gao et al., 2020		1426.01	1.4666			1377.36	1.48366			1329.96	1.50297
16SD73-1	A	WS	2-Low Nb/La group	49.0234	11.4633	11.1668	9.05001	13.621	3.00644	1.34983	0.15339	0.756724	0.40904	1.84	73.9766		4.8	22	2.05	2.53	Gao et al., 2020		1414.91	1.95199			1369.14	1.91576			1324.72	1.89162
LQX2	A	SNL	2-Low Nb/La group	51.3417	14.8076	12.4341	9.99839	8.10869	0.579907	1.94969	0.229963	0.509918	0.0399936	1.17	60.3143	351	1.1	3.03	2.16	2.53	Li and Wei, 2017		1446.88	1.70875			1400.52	1.67685
LQX7	A	SNL	2-Low Nb/La group	50.9387	14.6055	12.8986	8.87766	8.28582	0.642	2.89903	0.180563	0.621938	0.0501563	1.56	59.953	351	2.72	12.8	2.35	2.53	Li and Wei, 2017		1461.66	2.01629	-0.066		1419.81	1.98671	1.063		1373.89	1.93345	1.684
LQX8	A	SNL	2-Low Nb/La group	50.2548	14.4771	13.2873	9.04446	8.45417	0.67033	2.95145	0.190094	0.620306	0.0500246	1.36	59.723	336	1.87	8.69	2.1	2.53	Li and Wei, 2017		1483.99	2.2952	-0.245		1436.6	2.1981	0.37		1389.83	2.12305	0.95
17QX68-1	A	JD	2-Low Nb/La group	49.5887	14.1374	11.5118	11.7102	8.03724	0.542127	3.14598	0.171167	1.08394	0.0714663	0.993443	61.9351	291.4	3.93	5.612	2.012	2.7	Unpublished data		1424.98	1.92704	-1.079
18QX33-1	A	JD	2-Low Nb/La group	48.3341	13.8402	12.4253	11.3187	8.05544	0.500552	4.23097	0.185521	1.02989	0.079312	0.991984	60.1734	307.6	2.638	5.46	1.87	2.7	Unpublished data		1475.12	2.68598	-1.051
18QX68-1	A	JD	2-Low Nb/La group	47.9716	16.6461	10.135	8.58641	8.51564	3.06304	3.48463	0.1185	1.38298	0.0960937	1.75064	66.1949	388.6	2.98	18.356	1.884	2.5	Unpublished data		1371.92	2.18197	0.343		1338.95	2.15152
17QX87-1	A	JD	2-Low Nb/La group	47.724	13.8498	14.0539	12.5434	8.68545	0.591958	1.3268	0.214329	0.949173	0.061237	1.89	59.021	341.8	2.08	2.8	2.11	2.52	Unpublished data		1534.44	2.78817	-1.35		1483.5	2.63457			1437.64	2.55655
17QX54-1	A	JD	2-Low Nb/La group	50.9663	12.1734	10.0752	9.87473	9.31984	0.759346	6.02174	0.164623	0.59167	0.053116	0.998752	68.3121	232.8	2.81	8.406	1.748	2.52	He et al., 2021		1366.97	1.87534	-0.882		1327.38	1.83717	0.156		1293.53	1.8402	0.635
9QX08-1	A	JD	2-Low Nb/La group	48.8458	16.4334	10.5745	10.3487	9.36942	1.65969	1.74661	0.194652	0.781576	0.0455766	2.29545	67.3725	319.985	3.724	5.32073	2.0176	2.5	Unpublished data		1385.6	1.69803	-0.073		1342.63	1.67259	0.681		1305.39	1.68659	1.195
19JB88-3	A	JD	2-Low Nb/La group	47.9807	14.0453	13.8869	11.6427	9.5148	0.397034	1.61144	0.187444	0.701903	0.031759	1.02114	61.4907	293.4	2.33	3.848	2.166	2.7	Unpublished data		1528.2	2.70555	-1.619		1476.16	2.55457	-1.823		1424.91	2.43774	-0.795
19JB48-1	A	JD	2-Low Nb/La group	47.397	13.281	14.6546	12.351	9.54185	0.352416	1.12377	0.191092	1.03958	0.0676381	0.816089	60.2769	315	3.256	5.26	1.948	2.7	Unpublished data		1561.56	3.02643	-1.847		1507.82	2.83136	-2.194		1454.76	2.68006	-1.644
9QX03-1	A	JD	2-Low Nb/La group	48.5529	16.6775	10.5297	10.6857	9.58363	1.10281	1.73607	0.252061	0.834946	0.044585	2.63844	67.96	306.425	2.94777	4.474	1.95279	2.5	Unpublished data		1383.15	1.62672	-0.218		1344.17	1.64043	0.372
18QX41-1	A	JD	2-Low Nb/La group	49.7641	14.8464	9.38153	10.5459	10.5738	1.68961	2.56733	0.136689	0.477306	0.0173215	2.0689	72.4266		2.354	3.936	0.894	2.5	Unpublished data		1334.28	1.41243			1298.63	1.44521			1264.06	1.47931
19JB74-2	A	JD	2-Low Nb/La group	47.6646	14.6828	11.3919	11.9725	11.5008	0.965966	1.09287	0.136249	0.450525	0.141869	1.3677	70.174	253	1.252	7.456	1.354	2.7	Unpublished data		1431.23	1.87195			1385.63	1.85966			1336.84	1.82295
9QX02-1	A	JD	2-Low Nb/La group	49.0496	14.3704	11.2444	13.4273	9.04888	0.790244	1.23013	0.181016	0.653115	0.00486603	0.833	65.2229	214.675	0.708	2.667	1.051	2.7	Unpublished data		1418.35	1.62234	-1.866		1372.13	1.61132	-1.031		1331.65	1.64011	-0.496
9QX02-2	A	JD	2-Low Nb/La group	48.1462	14.2814	11.5336	13.1535	9.91676	0.712752	1.39007	0.174138	0.64507	0.0465718	1.299	66.7088	229.389	1.576	3.146	1.898	2.7	Unpublished data		1436.06	1.86361	-1.788		1387.81	1.824	-0.95		1345.41	1.83109	-0.402
19LN24-11	A	SNL	2-Low Nb/La group	48.4766	16.5527	10.8619	9.75874	9.82301	1.69586	1.65408	0.230871	0.862786	0.083531	2.4144	67.8209	352	2.9754	6.32905	2.27953	2.53	Unpublished data		1397.34	1.8048	0.077		1353.03	1.76529	0.756		1314.45	1.76814	1.336
19LN02-5	A	SNL	2-Low Nb/La group	51.2479	10.2435	13.4784	8.30072	12.9689	0.353063	2.29581	0.195584	0.891289	0.0248425	2.26366	69.1586	363	2.8	4.75116	1.2119	2.56	Unpublished data		1490.89	1.96166	-0.824		1438.72	1.91287	-0.31		1383.26	1.84594	0.374
6LB10-4	A	WS	2-Low Nb/La group	47.483	15.7292	12.1727	13.1882	8.62988	0.37468	1.86934	0.178584	0.369736	0.00471693	1.06892	62.2958	222.231	0.395871	3.74085	0.788303	2.68	Unpublished data		1466.94	2.26115			1419.37	2.18039			1372.91	2.12027
17SD88-3	A	WS	2-Low Nb/La group	48.6625	16.7392	10.4583	10.7252	8.89322	1.52974	1.90993	0.401014	0.598628	0.0822899	2.7838	66.4625	262	3.77862	6.76479	1.98456	2.56	Unpublished data		1381.33	1.70435	-0.654		1344	1.71336	0.366		1303.03	1.69746	0.39
17SD92-1	A	WS	2-Low Nb/La group	49.3731	16.3961	10.8507	10.5402	8.91032	1.31582	1.60233	0.138243	0.837851	0.0353078	1.84998	65.6799	310	2.58189	3.88727	2.02124	2.56	Unpublished data		1390.62	1.59464	-0.346		1351.91	1.6109	0.237		1309.52	1.60137	1.823
17SD88-1	A	WS	2-Low Nb/La group	49.1543	16.6175	9.56534	12.0249	9.09577	0.759608	1.74929	0.15219	0.801118	0.0799897	2.07923	68.9064	308	2.8976	6.27205	1.94964	2.56	Unpublished data		1344.96	1.27228	0.313		1308.85	1.32386	0.984
6LB04-2	A	WS	2-Low Nb/La group	49.3078	13.9287	11.7601	11.2545	10.4928	0.385187	2.33555	0.139602	0.39421	0.0014598	0.845355	67.5258	239.855	0.535444	1.96571	0.889799	2.68	Unpublished data
17SD12-3	A	WS	2-Low Nb/La group	50.1177	10.9002	11.552	13.808	11.4835	0.288878	0.77144	0.204875	0.38125	0.492179	2.10569	69.8493	186.936	3.72938	7.38896	1.7689	2.66	Unpublished data		1432.64	1.30386			1379.75	1.32364			1332.98	1.37676
W15FS29-2	A	SNL	2-Low Nb/La group	51.4798	14.0381	11.5346	11.4636	8.50395	0.719643	1.38861	0.182445	0.658828	0.0304075	1.22	63.2107	286	1.55	2.06	1.79	2.56	Wang et al., 2017		1411.5	1.36404	-0.853		1370.56	1.40289	0.049		1325.81	1.41208	0.661
W15FS24-2	A	SNL	2-Low Nb/La group	48.9193	14.9569	13.7291	8.86859	8.51344	1.17707	2.68899	0.182648	0.903095	0.0608828	1.32	59.1027		2.19	2.93	2.18	2.56	Wang et al., 2017		1505.61	2.69384			1457.89	2.55237			1410.74	2.44075
W15FS19-3	A	SNL	2-Low Nb/La group	50.5099	14.1876	11.5117	10.4009	8.64385	1.57528	2.27204	0.171665	0.686661	0.0403918	0.83	63.6353	304	1.85	3	1.78	2.56	Wang et al., 2017		1414.79	1.76678	-0.642		1375.42	1.76655	0.194		1332.2	1.74112	0.779
11JD06-4	B	NEH-WL	1-High Nb/La group	47.3129	14.435	14.2541	12.0141	8.75942	0.27122	1.84832	0.200904	0.843797	0.0602712	0.34	58.8838	314	1.9	2.42	2.32	2.54	Guo et al., 2013		1548.2	3.05108	-1.722
WJZ2-3	B	WT	1-High Nb/La group	49.9897	14.8473	12.1956	10.7615	9.40982	0.309534	1.57862	0.18572	0.670656	0.0515889	1.99	64.2621	211.5	1.99	2.17	1.67	2.54	Wang et al., 2014		1444.38	1.71173	-2.25
13LB31-5	B	NNL	1-High Nb/La group	48.2486	14.1122	13.6161	10.3057	10.245	0.566916	2.13606	0.192347	0.556793	0.020247	1.1	63.6827		1.84	2.36	1.9	2.56	Wang et al., 2017		1514.4	2.66099
FX012-1	B	NEH-WL	1-High Nb/La group	49.2057	14.7251	13.3707	11.0285	8.07536	0.733198	1.87373	0.183299	0.733198	0.0712831	1.7	58.4636	154	1.11	1.2	1.23	2.6	Wang et al., 2011		1497.12	2.37401	-3.22
OFX08-2	B	NEH-WL	1-High Nb/La group	46.9705	15.0492	13.7442	12.3666	8.48265	0.600725	1.58467	0.248576	0.901088	0.0517866	3.34	58.9885	249	1.833	1.671	2.12	2.6	Wang et al., 2011		1530.04	2.92084	-2.208
OFX08-1	B	NEH-WL	1-High Nb/La group	47.0743	15.821	13.9616	11.1461	8.53031	0.714361	1.67034	0.210106	0.829919	0.0420212	4.67	58.7442	242	1.618	1.596	2.08	2.6	Wang et al., 2011		1530.6	2.94939	-2.321
11XT88-2b	B	ZH	2-Low Nb/La group	51.7023	16.4877	10.7729	9.07843	8.01996	1.04829	1.91339	0.162842	0.712433	0.101776	2.21	63.4363	202	2.36	7.19	1.64	2.5	Deng et al., 2013		1374.06	1.27789	-1.584
11XT88-1a	B	ZH	2-Low Nb/La group	51.4775	16.3838	10.8701	10.0224	8.06042	0.364084	1.83053	0.161815	0.728169	0.101135	1.62	63.3446	204	2.39	6.69	1.76	2.5	Deng et al., 2013		1382.86	1.24052	-1.654
11XT88-2a	B	ZH	2-Low Nb/La group	51.7403	16.2641	10.9437	9.08758	8.1219	1.19948	1.64674	0.162641	0.731886	0.101651	2.13	63.3644	207	2.31	7.53	1.68	2.5	Deng et al., 2013		1380.66	1.29075	-1.587		1342.89	1.32897	-0.941
11XT116-7	B	ZH	2-Low Nb/La group	50.0291	15.2923	11.7503	9.02347	9.30704	0.263311	2.90655	0.172165	1.05324	0.202547	1.9	64.862	235	4.87	16.2	2.04	2.5	Deng et al., 2013		1425.89	1.79228	-1.599		1379.53	1.74902	-1.301		1338.57	1.74894	-0.778
GB32	B	NH	2-Low Nb/La group	50.1085	10.6003	12.5116	7.68674	13.6688	2.50026	1.89069	0.196301	0.557909	0.278954	2.68	71.7995		3.66	14.6	1.5	2.5	Ge et al., 2015		1460.94	2.1575			1411.8	2.08866			1359.56	2.00628
11JD06-2	B	NEH-WL	2-Low Nb/La group	45.5232	13.0124	15.067	13.4757	8.70178	0.906436	2.10495	0.241716	0.86615	0.100715	0.73	57.3735	322	2.52	8.26	2.33	2.53	Guo et al., 2013		1603.8	4.23681			1552.39	3.90134			1501.51	3.63746
11JD09-1	B	NEH-WL	2-Low Nb/La group	47.7645	14.6145	12.7304	12.2008	8.81964	0.682351	2.23037	0.193502	0.712904	0.0509217	1.7	61.7528	276	2.4	4.4	2.24	2.53	Guo et al., 2013		1483.32	2.48638	-1.337		1439.9	2.41855	-1.212		1392.54	2.32864	-0.625
11JD02-2	B	NEH-WL	2-Low Nb/La group	49.2815	13.3171	12.9225	10.929	8.9658	0.86015	2.70188	0.182149	0.779194	0.0607165	1.2	61.7873	297	1.86	2.98	2.21	2.53	Guo et al., 2013		1480.2	2.37073	-1.105		1432.25	2.26872	-0.987		1389.5	2.22598	-0.465
11JD12-2	B	NEH-WL	2-Low Nb/La group	49.1621	13.0123	12.8205	8.76237	10.2261	1.62528	2.7761	0.171613	0.959015	0.484555	0.78	65.0214	196	6.1	30	2.2	2.53	Guo et al., 2013		1473.39	2.42532	-2.077		1424.62	2.30873	-2.353		1381.13	2.25281	-1.837
11JD11-7	B	NEH-WL	2-Low Nb/La group	47.4607	13.3817	13.2205	9.41153	10.4595	1.75333	2.61991	0.161225	1.03789	0.493753	0.7	64.8357		3.71	24	1.3	2.53	Guo et al., 2013		1501.95	2.92543			1456.56	2.794			1407.4	2.65115
11JD12-1	B	NEH-WL	2-Low Nb/La group	47.4515	13.4412	13.1497	9.38977	10.4956	1.75932	2.62391	0.160853	1.02543	0.502664	0.55	65.0365	222	6.13	30	2.44	2.53	Guo et al., 2013		1502.87	2.94052			1452.84	2.76285			1403.83	2.6238
11JD75-1	B	NEH-WL	2-Low Nb/La group	45.6869	13.6643	11.0984	9.94054	12.7882	0.959633	3.06665	0.156462	2.01314	0.625848	4.15	72.8654	242	27	40	1.54	2.53	Guo et al., 2013		1437.27	2.56109			1391.9	2.469			1348	2.39962
12JD130-4	B	NEH-WL	2-Low Nb/La group	50.6842	9.80233	12.0628	10.076	12.7724	1.68272	1.87532	0.212874	0.516979	0.314242	1.07	71.1615		7.56	38	2.6	2.56	Guo et al., 2013		1441.6	1.79775			1393.64	1.77919			1346.77	1.76909
12JD29-1	B	NEH-WL	2-Low Nb/La group	49.7517	13.3752	12.5646	10.4367	9.42345	1.12473	2.37106	0.182389	0.719424	0.0506637	1.19	63.6082	264	2.96	9.52	1.87	2.53	Guo et al., 2013		1462.68	2.14601	-1.749		1414.78	2.06644	-1.05		1367.84	2.0067	-0.455
11JD63-4	B	NEH-WL	2-Low Nb/La group	48.4002	10.5971	12.2274	11.1066	13.7559	1.63032	1.39596	0.183411	0.601182	0.101895	1.88	72.3895		7.27	18	1.78	2.5	Guo et al., 2013		1469.07	2.21389			1418.17	2.14905			1368.64	2.10195
LQA2	B	NNL	2-Low Nb/La group	48.9151	13.8364	11.7192	13.938	8.28966	0.761917	1.78797	0.213337	0.497786	0.0406356	2.68	62.2427	221	0.9	1.9	1.91	2.55	Li and Wei, 2017		1442.79	1.91311	-2.179		1396.81	1.87457	-0.779		1351.93	1.84918	-0.173
LQH9	B	NNL	2-Low Nb/La group	46.6763	13.2403	15.5044	9.85766	8.99699	0.660513	2.48193	0.190148	2.22173	0.170132	1.58	57.4895	370	12.2	16.4	2	2.55	Li and Wei, 2017		1595.25	3.89381	-1.874		1543.41	3.59002			1491.94	3.35009
LQH10	B	NNL	2-Low Nb/La group	46.3286	12.7831	16.1711	9.55734	9.49742	0.64914	2.4168	0.199735	2.21706	0.179762	1.46	57.7832	375	4.79	16.7	2.05	2.55	Li and Wei, 2017		1622.97	4.31286	-2.074		1569.67	3.94129			1516.68	3.64946
LQJ2	B	NNL	2-Low Nb/La group	48.392	14.8365	12.5202	10.129	11.3562	0.502931	1.64961	0.170997	0.392286	0.0502931	1.8	67.8853	179	1.11	1.58	1.52	2.55	Li and Wei, 2017		1467.9	2.11062			1415.64	2.024			1369.07	1.99304
LQJ3	B	NNL	2-Low Nb/La group	47.7985	14.756	12.9226	10.0687	11.8591	0.281641	1.68985	0.170996	0.402344	0.0502931	1.86	68.1397		1.21	1.76	1.58	2.55	Li and Wei, 2017		1489.57	2.33561			1435.26	2.21705			1386.66	2.16282
10LF46	B	NH	2-Low Nb/La group	50.492	12.8742	11.0202	8.72087	11.3827	1.72967	2.1854	0.176075	0.693941	0.725013		70.6501	196	3.97	16.1	1.74	2.5	Liou et al., 2017		1397.2	1.6008	-1.693		1350.07	1.57378	-0.985		1308.75	1.58519	-0.421
10LF34	B	NH	2-Low Nb/La group	51.2095	10.4756	11.0394	10.5371	12.0541	1.00451	2.07052	0.205002	0.635506	0.768758		71.7891	150	9	43.6	2.79	2.5	Liou et al., 2017		1401.76	1.37817	-2.472		1351.86	1.37715	-1.712		1308	1.41026	-1.117
10CYK01	B	NH	2-Low Nb/La group	48.4172	10.8251	10.9393	7.01609	17.2911	2.52206	1.13129	0.17644	0.62273	1.05864		78.6493	168	3.91	14.5	1.18	2.5	Liou et al., 2017		1415.99	1.84822	-1.877		1366.86	1.83213	-1.276		1315.3	1.79665	-0.587
12WT35-1	B	WT	2-Low Nb/La group	50.4546	17.2234	9.54132	9.88865	8.17244	0.18388	3.49372	0.132802	0.796813	0.112371	1.4	66.6238		3.35	9.34	1.42	2.55	Liu et al., 2016
12WT45-1	B	WT	2-Low Nb/La group	51.4443	12.4792	10.2764	7.62677	12.8948	1.4547	2.77431	0.176642	0.613051	0.259767	3.01	74.5179		5.56	20	1.71	2.55	Liu et al., 2016
2111-1	B	WT	2-Low Nb/La group	49.6736	16.3872	11.6014	10.3342	8.00923	0.20484	2.42735	0.215082	0.983231	0.163872	2.92	61.6697		2.7	7.3	1.6	2.55	Lv et al., 2006		1421.33	1.73475
2002-11?	B	WT	2-Low Nb/La group	50.8051	15.1315	11.0811	9.65097	8.41084	3.35034	0.070007	0.180018	0.860086	0.460046	0.81	63.8847		1.49	12.07	1.77	2.55	Polat et al., 2005		1390.27	1.47894			1352.39	1.5024			1310.69	1.50015
2002-86	B	WT	2-Low Nb/La group	47.7048	14.3914	15.2615	9.88099	9.56096	1.79018	0.050005	0.290029	0.610061	0.460046	0.91	59.3496		1.73	3.1	1.64	2.55	Polat et al., 2005		1574.09	3.15687			1520.74	2.93904			1467.83	2.76845
2002-85	B	WT	2-Low Nb/La group	48.8151	12.5687	15.1185	9.69903	10.8089	1.27987	0.089991	0.279972	1.0299	0.309969	1.42	62.4932		3.49	11.49	3.16	2.55	Polat et al., 2005		1562.03	2.7386			1510.38	2.60821			1454.83	2.46614
WS98	B	WT	2-Low Nb/La group	49.3418	18.9178	9.95128	9.28786	8.23054	0.0207318	3.2549	0.217684	0.725614	0.0518296	4.24	65.8414		0.53	4.43	1.04	2.55	Wang et al., 2004
WR12	B	WT	2-Low Nb/La group	50.0915	14.0244	13.8923	10.7215	8.3435	0.528455	1.48374	0.223577	0.630081	0.0609756	2.58	58.3275		2.12	4.57	1.28	2.55	Wang et al., 2004		1510.26	2.26714			1460.51	2.17139			1411.31	2.09805
WR20	B	WT	2-Low Nb/La group	47.4346	15.2461	12.7853	5.61257	12.8796	4.19895	0.691099	0.209424	0.858639	0.0837696	4.43	70.1285		0	7.47	1.39	2.55	Wang et al., 2004		1473.63	2.68794			1427.36	2.56531			1377.69	2.43509
12LN79-1	B	NNL	2-Low Nb/La group	48.1519	14.7145	13.8685	10.9377	9.02407	0.151073	2.0143	0.211502	0.86615	0.060429	0.59	60.2612	328	1.09	2.07	1.35	2.56	Wang et al., 2017		1522.52	2.66647	-1.302		1471.6	2.52221	-1.551		1421.38	2.41014	-0.724
12LN76-2	B	NNL	2-Low Nb/La group	48.087	17.8947	11.8016	10.1721	9.07895	0.526316	1.7915	0.172065	0.445344	0.0303644	1.1	64.1942	163	1.37	2.19	1.12	2.56	Wang et al., 2017		1434.68	1.96274			1392.83	1.94121	-1.732		1347.21	1.89599	-1.123
FX009-4	B	NEH-WL	2-Low Nb/La group	46.475	14.2239	12.5438	8.57555	14.9557	1.83467	0.453515	0.175222	0.535972	0.226757	2.77	73.5352		1.59	8.19	0.79	2.53	Wang et al., 2011		1486.65	2.5031			1432.57	2.385			1380.07	2.29621
OFX08-3	B	NEH-WL	2-Low Nb/La group	48.6335	13.882	13.1573	11.5839	8.00207	0.672878	2.98137	0.186335	0.848861	0.0517598	3.3	58.6327	227	1.881	2.64	1.845	2.53	Wang et al., 2011		1495.88	2.6308	-2.133
12FX18-1	B	NEH-WL	2-Low Nb/La group	48.2866	13.5759	12.1548	13.1123	8.12336	0.957468	2.74138	0.191494	0.806289	0.0503931	0.66	60.8998	210	2.66	5.58	1.349	2.53	Wang et al., 2011		1463.24	2.37848	-1.931		1417.75	2.29	-2.019
13PQ07-2	B	NH	2-Low Nb/La group	50.0465	12.3851	12.1992	10.3915	10.2262	0.939986	1.78701	0.175602	1.0846	0.764384	2.94	66.1429		7.33	47	1.56	2.5	Wang et al., 2017		1446.16	1.78915			1401.01	1.77952			1352.3	1.74526
14YZS-12	B	WT	2-Low Nb/La group	49.449	12.8839	13.9616	11.0777	8.5232	0.759147	2.37714	0.275208	0.663722	0.0293716	0.95554	58.724	281.929	2.3765	3.66189	1.96581	2.54	Wang et al., 2019		1518.79	2.63295	-1.748		1469.51	2.49826	-1.433		1420.82	2.39306	-0.852
17YZS-22	B	WT	2-Low Nb/La group	49.6898	14.1595	11.63	10.8779	8.86233	0.779885	2.63338	0.182311	0.952067	0.232953	1.08	63.9757		1.93454	7.40776	1.28284	2.5	Wang et al., 2019		1426.65	1.86729			1381.21	1.82341			1341.23	1.82424
H-442	B	NNL	2-Low Nb/La group	47.1591	19.3157	11.5072	9.87363	8.21946	1.23292	1.58225	0.297955	0.575362	0.236309	1.81	62.4715		2.27	5.26	1.69	2.55	Zhang et al., 2010		1426.63	2.09643			1387.29	2.0667
Z05-1	B	ZH	2-Low Nb/La group	49.4489	16.756	11.7707	8.67631	8.19092	0.303367	3.77187	0.202245	0.768531	0.111235	1.48	61.8574	224	2.33	7.07	1.78	2.5	Zhang et al., 2019		1426.45	2.02841	-1.901		1387.34	2.00141	-1.374
D0527-3	B	ZH	2-Low Nb/La group	48.9595	16.5364	11.4709	9.88732	8.27327	0.385748	3.46158	0.172571	0.751193	0.101513	1.13	62.6984	197	2.21	6.86	1.74	2.5	Zhang et al., 2019		1424.34	2.04198	-2.219		1380.57	1.98145	-1.637		1337.85	1.93708	-1.073
QS-7	B	NNL	2-Low Nb/La group	51.8723	14.6307	13.1983	8.67608	8.04174	0.429711	2.05648	0.184162	0.838961	0.0716186	1.59	58.6773		2.5	4.01	1.53	2.56	Zhang, 2014		1466.52	1.77548
Reference
Deng, H. et al. Geochemistry of Neoarchean mafic volcanic rocks and late mafic dikes in the Zanhuang Complex, Central Orogenic Belt, North China Craton: Implications for geodynamic setting. Lithos 175-176, 193-212 (2013).
Fu, J., Liu, S., Sun, G. & Gao, L. Two contrasting Neoarchean metavolcanic rock suites in eastern Hebei and their geodynamic implications for the northern North China Craton. Gondwana Res. 95, 45-71 (2021).
Gao, L. et al. A Ca. 2.8-Ga Plume-Induced Intraoceanic Arc System in the Eastern North China Craton. Tectonics 38, 1694-1717 (2019a).
Gao, L. et al. Neoarchean crust-mantle interactions in the Yishui Terrane, south-eastern margin of the North China Craton: Constraints from geochemistry and zircon U-Pb-Hf isotopes of metavolcanic rocks and high-K granitoids. Gondwana Res. 65, 97-124 (2019b).
Ge, S. et al. Zircon U–Pb geochronology and geochemistry of low-grade metamorphosed volcanic rocks from the Dantazi Complex: Implications for the evolution of the North China Craton. J. Asian Earth Sci. 111, 948-965 (2015).
Guo, B. et al. Neoarchean Andean-type active continental margin in the northeastern North China Craton: Geochemical and geochronological evidence from metavolcanic rocks in the Jiapigou granite-greenstone belt, Southern Jilin Province. Precambrian Res. 285, 147-169 (2016).
Guo, R. et al. Geochemistry, zircon U–Pb geochronology and Lu–Hf isotopes of metavolcanics from eastern Hebei reveal Neoarchean subduction tectonics in the North China Craton. Gondwana Res. 24, 664-686 (2013).
Guo, R. et al. Neoarchean subduction: A case study of arc volcanic rocks in Qinglong-Zhuzhangzi area of the Eastern Hebei Province, North China Craton. Precambrian Res. 264, 36-62 (2015).
Guo, R., Liu, S., Bai, X. & Wang, W. A Neoarchean subduction recorded by the Eastern Hebei Precambrian basement, North China Craton: Geochemical fingerprints from metavolcanic rocks of the Saheqiao-Shangying-Qinglong supracrustal belt. J. Asian Earth Sci. 135, 347-369 (2017).
Li, Z. & Wei, C. Two types of Neoarchean basalts from Qingyuan greenstone belt, North China Craton: Petrogenesis and tectonic implications. Precambrian Res. 292, 175-193 (2017).
Liu, C., Zhao, G., Liu, F. & Shi, J. Constraints of volcanic rocks of the Wutai Complex (Shanxi Province, Northern China) on a giant late Neoarchean intra-oceanic arc system in the Trans-North China Orogen. J. Asian Earth Sci. 123, 178-212 (2016).
Liou, P., Shan, H., Liu, F. & Guo, J. Petrogenesis of Neoarchean metavolcanic rocks in Changyukou, Northwestern Hebei: Implications for the transition stage from a compressional to an extensional regime for the North China Craton. Lithos 274-275, 53-72 (2017).
Lu, Y. et al. Geochemistry and Petrogenesis of Neoarchean Metamorphic Mafic Rocks in the Wutai Complex. Acta Geol. Sinica 80, 899-911 (2010).
Peng, P., Wang, C., Wang, X. & Yang, S. Qingyuan high-grade granite–greenstone terrain in the Eastern North China Craton: Root of a Neoarchaean arc. Tectonophysics 662, 7-21 (2015).
Polat, A. et al. Geochemistry of Neoarchean (ca. 2.55–2.50 Ga) volcanic and ophiolitic rocks in the Wutaishan greenstone belt, central orogenic belt, North China craton: Implications for geodynamic setting and continental growth. Geol Soc Am Bull. 117 (2005).
Shan, H., Zhai, M., Oliveira, E. P., Santosh, M. & Wang, F. Convergent margin magmatism and crustal evolution during Archean-Proterozoic transition in the Jiaobei terrane: Zircon U–Pb ages, geochemistry, and Nd isotopes of amphibolites and associated grey gneisses in the Jiaodong complex, North China Craton. Precambrian Res. 264, 98-118 (2015).
Wang, C., Zhang, L., Lan, C. & Dai, Y. Petrology and geochemistry of the Wangjiazhuang banded iron formation and associated supracrustal rocks from the Wutai greenstone belt in the North China Craton: Implications for their origin and tectonic setting. Precambrian Res. 255, 603-626 (2014).
Wang, W. et al. Geochemistry and zircon U–Pb–Hf isotopic systematics of the Neoarchean Yixian–Fuxin greenstone belt, northern margin of the North China Craton: Implications for petrogenesis and tectonic setting. Gondwana Res. 20, 64-81 (2011).
Wang, W. et al. Geochemistry of ∼2.7Ga basalts from Taishan area: Constraints on the evolution of early Neoarchean granite-greenstone belt in western Shandong Province, China. Precambrian Res. 224, 94-109 (2013).
Wang, W. et al. Cyclic formation and stabilization of Archean lithosphere by accretionary orogenesis: Constraints from TTG and potassic granitoids, North China Craton. Tectonics 36, 1724-1742 (2017a).
Wang, W. et al. Late Neoarchean crust-mantle geodynamics: Evidence from Pingquan Complex of the Northern Hebei Province, North China Craton. Precambrian Res. 303, 470-493 (2017b).
Wang, W. et al. Neoarchean intra-oceanic arc system in the Western Liaoning Province: Implications for Early Precambrian crustal evolution in the Eastern Block of the North China Craton. Earth-Sci Rev. 150, 329-364 (2015).
Wang, X., Zheng, Y.-F. & Zhu, W.-B. Geochemical constraints on the origin of Neoarchean magmatic rocks in the Lüliang Complex, North China Craton: Tectonic implications. Precambrian Res. 327, 212-231 (2019).
Wang, Z., Wilde, S. A., Wang, K. & Yu, L. A MORB-arc basalt–adakite association in the 2.5 Ga Wutai greenstone belt: late Archean magmatism and crustal growth in the North China Craton. Precambrian Res. 131, 323-343 (2004).
Zhang, F. et al. The Neoarchean-Paleoproterozoic volcanic-sedimentary rocks in the Zanhuang Complex, North China Craton: Petrogenesis and implications for tectonic evolution. Precambrian Res. 328, 64-80 (2019).
Zhang, Y. et al. Metallogenic Age and Ore Remobilization Mechanisms of Shujigou Coper-Zinc Deposit,Liaoning Province,China.Journal of Jilin University: Earth Science Edition. 44, 786-795 (2014).
Zhang, Y., Study on the geological features and metallogenic model of Hongtoushan copper-zinc deposit, Liaoning Province (Master Thesis) Jilin University,1-82 (2010).
He, X. et al. Late Neoarchean crustal growth under paired continental arc-back arc system in the North China Craton. Geosci. Front. 12, 101120 (2021).

## Sheet: B. Zirocn Hf isotopic data
Sample No.	Location	Lithology	176Hf/177Hf	2σ	εHf(t2)	Reference
19LN24-6, Crystallization age t2 = 2533 Ma
19LN24-6-01	SNL	2-Low Nb/La group			7.4163	Unpublished data
19LN24-6-03	SNL	2-Low Nb/La group			7.03007	Unpublished data
19LN24-6-08	SNL	2-Low Nb/La group			9.12133	Unpublished data
19LN24-6-09	SNL	2-Low Nb/La group			7.27308	Unpublished data
19LN24-6-10	SNL	2-Low Nb/La group			6.42079	Unpublished data
19LN24-6-11	SNL	2-Low Nb/La group			5.99743	Unpublished data
19LN24-6-12	SNL	2-Low Nb/La group			6.54962	Unpublished data
19LN24-6-19	SNL	2-Low Nb/La group			8.7121	Unpublished data
LQX6, Crystallization age t2 = 2530 Ma
LQX6.01	SNL	2-Low Nb/La group	0.281432	2.4e-05	9.11403	Li and Wei, 2017
LQX6.02	SNL	2-Low Nb/La group	0.281386	2.1e-05	7.67066	Li and Wei, 2017
LQX6.03	SNL	2-Low Nb/La group	0.281382	2.8e-05	7.54731	Li and Wei, 2017
LQX6.04	SNL	2-Low Nb/La group	0.28131	2e-05	4.3965	Li and Wei, 2017
LQX6.05	SNL	2-Low Nb/La group	0.281416	2.4e-05	8.268	Li and Wei, 2017
LQX6.06	SNL	2-Low Nb/La group	0.281435	2.3e-05	8.42596	Li and Wei, 2017
LQX6.07	SNL	2-Low Nb/La group	0.281385	2.8e-05	7.11557	Li and Wei, 2017
LQX6.08	SNL	2-Low Nb/La group	0.281351	2.3e-05	6.2865	Li and Wei, 2017
LQX6.09	SNL	2-Low Nb/La group	0.281373	1.8e-05	6.77823	Li and Wei, 2017
LQX6.10	SNL	2-Low Nb/La group	0.281391	2.6e-05	7.34272	Li and Wei, 2017
LQX6.11	SNL	2-Low Nb/La group	0.281374	2.4e-05	6.83616	Li and Wei, 2017
LQX6.12	SNL	2-Low Nb/La group	0.281379	2.4e-05	6.49962	Li and Wei, 2017
LQX6.13	SNL	2-Low Nb/La group	0.281414	2.4e-05	8.06269	Li and Wei, 2017
LQX6.14	SNL	2-Low Nb/La group	0.281441	2.1e-05	9.15716	Li and Wei, 2017
LQX6.15	SNL	2-Low Nb/La group	0.281374	2.6e-05	6.62112	Li and Wei, 2017
LQX6.16	SNL	2-Low Nb/La group	0.281363	2.3e-05	6.6634	Li and Wei, 2017
LQX6.17	SNL	2-Low Nb/La group	0.281323	2.2e-05	4.75908	Li and Wei, 2017
LQX6.18	SNL	2-Low Nb/La group	0.281379	2.3e-05	7.02603	Li and Wei, 2017
LQX6.19	SNL	2-Low Nb/La group	0.281402	2.4e-05	7.68234	Li and Wei, 2017
LQX6.20	SNL	2-Low Nb/La group	0.281418	2.8e-05	8.28925	Li and Wei, 2017
LQX6.21	SNL	2-Low Nb/La group	0.281383	1.9e-05	7.45214	Li and Wei, 2017
LQX6.22	SNL	2-Low Nb/La group	0.281375	2.5e-05	6.81323	Li and Wei, 2017
16SD69-1, Crystallization age t2 = 2516 Ma
1	WS	1-High Nb/La group	0.281352	1.5e-05	5.24565	Gao et al., 2020
2	WS	1-High Nb/La group	0.281423	1.1e-05	7.29526	Gao et al., 2020
3	WS	1-High Nb/La group	0.281432	1.2e-05	7.90783	Gao et al., 2020
16SD168-4, Crystallization age t2 = 2505 Ma
1	WS	2-Low Nb/La group	0.281461	1.3e-05	8.20845	Gao et al., 2020
2	WS	2-Low Nb/La group	0.281514	1.6e-05	8.7788	Gao et al., 2020
3	WS	2-Low Nb/La group	0.281514	1.2e-05	9.8771	Gao et al., 2020
4	WS	2-Low Nb/La group	0.281456	1.2e-05	8.0732	Gao et al., 2020
5	WS	2-Low Nb/La group	0.281424	1.3e-05	6.78701	Gao et al., 2020
6	WS	2-Low Nb/La group	0.281492	1.5e-05	8.46806	Gao et al., 2020
7	WS	2-Low Nb/La group	0.281497	1.1e-05	8.58969	Gao et al., 2020
8	WS	2-Low Nb/La group	0.281506	1.7e-05	7.37216	Gao et al., 2020
9	WS	2-Low Nb/La group	0.281545	1.4e-05	8.04739	Gao et al., 2020
10	WS	2-Low Nb/La group	0.281569	1.5e-05	8.25558	Gao et al., 2020
JN0740, Crystallization age t2 = 2570 Ma
1	WS	2-Low Nb/La group	0.281246	1.9e-05	2.71902	Jiang et al., 2010
3	WS	2-Low Nb/La group	0.281236	1.9e-05	2.65354	Jiang et al., 2010
4	WS	2-Low Nb/La group	0.281299	2.6e-05	5.22485	Jiang et al., 2010
5	WS	2-Low Nb/La group	0.281329	2.1e-05	5.88807	Jiang et al., 2010
6	WS	2-Low Nb/La group	0.281277	1.6e-05	4.4633	Jiang et al., 2010
10	WS	2-Low Nb/La group	0.28128	2.3e-05	4.6312	Jiang et al., 2010
12	WS	2-Low Nb/La group	0.281341	2.4e-05	6.98276	Jiang et al., 2010
13	WS	2-Low Nb/La group	0.281289	2.3e-05	4.80621	Jiang et al., 2010
14	WS	2-Low Nb/La group	0.281261	2.6e-05	3.74733	Jiang et al., 2010
15	WS	2-Low Nb/La group	0.281286	1.9e-05	4.36034	Jiang et al., 2010
16	WS	2-Low Nb/La group	0.281278	1.8e-05	4.20515	Jiang et al., 2010
17	WS	2-Low Nb/La group	0.281295	2.7e-05	4.82032	Jiang et al., 2010
21	WS	2-Low Nb/La group	0.281283	2.7e-05	2.00532	Jiang et al., 2010
17SD11-5, Crystallization age t2 = 2591 Ma
1	WS	2-Low Nb/La group	0.28126	0.00011	1.7814	Gao et al., 2020
2	WS	2-Low Nb/La group	0.281295	4.3e-05	3.98018	Gao et al., 2020
3	WS	2-Low Nb/La group	0.281285	7.7e-05	3.35649	Gao et al., 2020
4	WS	2-Low Nb/La group	0.281353	6.3e-05	5.07365	Gao et al., 2020
5	WS	2-Low Nb/La group	0.281296	8.3e-05	2.67939	Gao et al., 2020
6	WS	2-Low Nb/La group	0.28129	6.4e-05	2.99663	Gao et al., 2020
7	WS	2-Low Nb/La group	0.281421	6.6e-05	3.14313	Gao et al., 2020
8	WS	2-Low Nb/La group	0.281375	5.1e-05	5.88266	Gao et al., 2020
16SD157-7, Crystallization age t2 = 2585 Ma
1	WS	2-Low Nb/La group	0.281208	1.2e-05	2.66852	Gao et al., 2020
2	WS	2-Low Nb/La group	0.281249	1.1e-05	4.13747	Gao et al., 2020
3	WS	2-Low Nb/La group	0.281271	1.1e-05	4.80922	Gao et al., 2020
4	WS	2-Low Nb/La group	0.281251	1.3e-05	4.22268	Gao et al., 2020
5	WS	2-Low Nb/La group	0.281257	1.2e-05	4.44666	Gao et al., 2020
6	WS	2-Low Nb/La group	0.281257	1.1e-05	4.32354	Gao et al., 2020
7	WS	2-Low Nb/La group	0.281271	1.2e-05	4.77404	Gao et al., 2020
8	WS	2-Low Nb/La group	0.281265	1e-05	4.62745	Gao et al., 2020
9	WS	2-Low Nb/La group	0.281272	1e-05	4.78675	Gao et al., 2020
10	WS	2-Low Nb/La group	0.281282	9e-06	5.02286	Gao et al., 2020
11	WS	2-Low Nb/La group	0.281251	1.1e-05	4.04504	Gao et al., 2020
17SD34-3, Crystallization age t2 = 2728 Ma
1	WS	2-Low Nb/La group	0.281282	5.8e-05	6.60925	Gao et al., 2019
2	WS	2-Low Nb/La group	0.281241	6.2e-05	6.20269	Gao et al., 2019
3	WS	2-Low Nb/La group	0.28123	6.8e-05	5.42456	Gao et al., 2019
4	WS	2-Low Nb/La group	0.281232	5.9e-05	5.65562	Gao et al., 2019
5	WS	2-Low Nb/La group	0.281259	5.9e-05	5.9619	Gao et al., 2019
6	WS	2-Low Nb/La group	0.28123	5.2e-05	6.07343	Gao et al., 2019
7	WS	2-Low Nb/La group	0.281211	5.8e-05	5.04225	Gao et al., 2019
8	WS	2-Low Nb/La group	0.28126	5.6e-05	6.16853	Gao et al., 2019
9	WS	2-Low Nb/La group	0.2813	6.5e-05	7.66248	Gao et al., 2019
10	WS	2-Low Nb/La group	0.28124	7.7e-05	5.78968	Gao et al., 2019
11	WS	2-Low Nb/La group	0.281255	6.8e-05	6.22674	Gao et al., 2019
12	WS	2-Low Nb/La group	0.281181	4.9e-05	4.03242	Gao et al., 2019
13	WS	2-Low Nb/La group	0.281219	6.1e-05	5.38083	Gao et al., 2019
6LB03-5, Crystallization age t2 = 2766 Ma
1	WS	2-Low Nb/La group	0.281234	1e-05	7.193	Gao et al., 2019
2	WS	2-Low Nb/La group	0.281251	1e-05	7.15862	Gao et al., 2019
3	WS	2-Low Nb/La group	0.28121	1.3e-05	6.2522	Gao et al., 2019
4	WS	2-Low Nb/La group	0.281266	1.2e-05	6.7664	Gao et al., 2019
5	WS	2-Low Nb/La group	0.281239	1.3e-05	7.50295	Gao et al., 2019
6	WS	2-Low Nb/La group	0.281254	1.2e-05	6.90704	Gao et al., 2019
7	WS	2-Low Nb/La group	0.281255	1.3e-05	6.62767	Gao et al., 2019
8	WS	2-Low Nb/La group	0.281269	1.2e-05	6.7053	Gao et al., 2019
9	WS	2-Low Nb/La group	0.281241	1.1e-05	6.58776	Gao et al., 2019
10	WS	2-Low Nb/La group	0.281237	1.1e-05	6.61893	Gao et al., 2019
11	WS	2-Low Nb/La group	0.281216	1.1e-05	6.50343	Gao et al., 2019
12	WS	2-Low Nb/La group	0.281233	1.2e-05	6.5011	Gao et al., 2019
13	WS	2-Low Nb/La group	0.281258	1e-05	7.54917	Gao et al., 2019
14	WS	2-Low Nb/La group	0.281237	1e-05	6.77169	Gao et al., 2019
15	WS	2-Low Nb/La group	0.281302	1.2e-05	5.88239	Gao et al., 2019
6LB16-7, Crystallization age t2 = 2758 Ma
1	WS	2-Low Nb/La group	0.281355	1.4e-05	7.38689	Gao et al., 2019
2	WS	2-Low Nb/La group	0.281412	1.4e-05	5.88209	Gao et al., 2019
3	WS	2-Low Nb/La group	0.281448	1.2e-05	8.3252	Gao et al., 2019
4	WS	2-Low Nb/La group	0.281412	1.6e-05	8.01627	Gao et al., 2019
5	WS	2-Low Nb/La group	0.281359	1.3e-05	6.33898	Gao et al., 2019
6	WS	2-Low Nb/La group	0.281304	1.1e-05	6.91274	Gao et al., 2019
7	WS	2-Low Nb/La group	0.281336	1.5e-05	6.26702	Gao et al., 2019
8	WS	2-Low Nb/La group	0.281347	1.5e-05	5.38359	Gao et al., 2019
6LB05-1, Crystallization age t2 = 2733 Ma
1	WS	2-Low Nb/La group	0.281242	3e-05	6.89075	Hu et al., 2019
2	WS	2-Low Nb/La group	0.281228	1.9e-05	5.22466	Hu et al., 2019
3	WS	2-Low Nb/La group	0.2813	2.7e-05	8.86142	Hu et al., 2019
4	WS	2-Low Nb/La group	0.281349	1.7e-05	6.65225	Hu et al., 2019
17YT06-3, Crystallization age t2 = 2703 Ma
17YT06-3-02	JD	2-Low Nb/La group			1.53892	Unpublished data
17YT06-3-03	JD	2-Low Nb/La group			0.908559	Unpublished data
17YT06-3-04	JD	2-Low Nb/La group			1.11622	Unpublished data
17YT06-3-05	JD	2-Low Nb/La group			3.61583	Unpublished data
17YT06-3-06	JD	2-Low Nb/La group			3.16375	Unpublished data
17YT06-3-07	JD	2-Low Nb/La group			2.64983	Unpublished data
17YT06-3-08	JD	2-Low Nb/La group			1.44334	Unpublished data
17YT06-3-09	JD	2-Low Nb/La group			0.809923	Unpublished data
17YT06-3-10	JD	2-Low Nb/La group			0.207634	Unpublished data
17YT06-3-11	JD	2-Low Nb/La group			1.80632	Unpublished data
17YT06-3-12	JD	2-Low Nb/La group			0.093562	Unpublished data
17YT06-3-13	JD	2-Low Nb/La group			2.42297	Unpublished data
18QX64-1, Crystallization age t2 = 2716 Ma
18QX64-1-02	JD	2-Low Nb/La group			1.3384	Unpublished data
18QX64-1-03	JD	2-Low Nb/La group			5.206	Unpublished data
18QX64-1-04	JD	2-Low Nb/La group			4.94772	Unpublished data
18QX64-1-06	JD	2-Low Nb/La group			6.85122	Unpublished data
18QX64-1-07	JD	2-Low Nb/La group			0.791491	Unpublished data
18QX64-1-08	JD	2-Low Nb/La group			2.02162	Unpublished data
18QX64-1-09	JD	2-Low Nb/La group			5.63039	Unpublished data
18QX64-1-10	JD	2-Low Nb/La group			0.460672	Unpublished data
18QX64-1-11	JD	2-Low Nb/La group			3.18549	Unpublished data
18QX64-1-12	JD	2-Low Nb/La group			3.25998	Unpublished data
18QX64-1-13	JD	2-Low Nb/La group			1.80332	Unpublished data
18QX64-1-14	JD	2-Low Nb/La group			2.90713	Unpublished data
18QX64-1-15	JD	2-Low Nb/La group			3.18512	Unpublished data
18QX68-1, Crystallization age t2 = 2731 Ma
18QX68-1-01	JD	2-Low Nb/La group			2.90051	Unpublished data
18QX68-1-02	JD	2-Low Nb/La group			2.65979	Unpublished data
18QX68-1-03	JD	2-Low Nb/La group			2.30824	Unpublished data
18QX68-1-04	JD	2-Low Nb/La group			2.24789	Unpublished data
18QX68-1-05	JD	2-Low Nb/La group			1.18045	Unpublished data
18QX68-1-06	JD	2-Low Nb/La group			0.980684	Unpublished data
18QX68-1-07	JD	2-Low Nb/La group			3.13028	Unpublished data
18QX68-1-08	JD	2-Low Nb/La group			4.17878	Unpublished data
18QX68-1-09	JD	2-Low Nb/La group			0.492607	Unpublished data
18QX68-1-10	JD	2-Low Nb/La group			2.45797	Unpublished data
18QX68-1-11	JD	2-Low Nb/La group			1.11897	Unpublished data
18QX68-1-12	JD	2-Low Nb/La group			2.32771	Unpublished data
18QX68-1-13	JD	2-Low Nb/La group			3.82782	Unpublished data
18QX68-1-14	JD	2-Low Nb/La group			2.84463	Unpublished data
18QX68-1-15	JD	2-Low Nb/La group			3.58306	Unpublished data
18QX68-1-16	JD	2-Low Nb/La group			2.07872	Unpublished data
18QX68-1-17	JD	2-Low Nb/La group			0.28621	Unpublished data
18QX68-1-18	JD	2-Low Nb/La group			0.661485	Unpublished data
18QX68-1-19	JD	2-Low Nb/La group			2.03029	Unpublished data
18QX68-1-20	JD	2-Low Nb/La group			3.75154	Unpublished data
18QX68-1-21	JD	2-Low Nb/La group			3.45525	Unpublished data
18QX68-1-22	JD	2-Low Nb/La group			3.23356	Unpublished data
18QX68-1-23	JD	2-Low Nb/La group			2.21209	Unpublished data
18QX68-1-24	JD	2-Low Nb/La group			3.23089	Unpublished data
18QX68-1-25	JD	2-Low Nb/La group			2.72134	Unpublished data
18QX68-1-26	JD	2-Low Nb/La group			2.3519	Unpublished data
18QX68-1-27	JD	2-Low Nb/La group			2.69929	Unpublished data
18QX68-1-28	JD	2-Low Nb/La group			0.797921	Unpublished data
18QX68-1-29	JD	2-Low Nb/La group			3.67603	Unpublished data
18QX68-1-30	JD	2-Low Nb/La group			1.28379	Unpublished data
19JB73-1, Crystallization age t2 = 2858 Ma
19JB73-1-01	JD	2-Low Nb/La group			5.59498	Unpublished data
19JB73-1-02	JD	2-Low Nb/La group			6.35042	Unpublished data
19JB73-1-03	JD	2-Low Nb/La group			5.94343	Unpublished data
19JB73-1-04	JD	2-Low Nb/La group			7.30482	Unpublished data
19JB73-1-05	JD	2-Low Nb/La group			5.13897	Unpublished data
19JB73-1-06	JD	2-Low Nb/La group			4.67791	Unpublished data
19JB73-1-07	JD	2-Low Nb/La group			4.17811	Unpublished data
19JB73-1-08	JD	2-Low Nb/La group			5.18215	Unpublished data
19JB73-1-09	JD	2-Low Nb/La group			5.19258	Unpublished data
19JB73-1-10	JD	2-Low Nb/La group			4.88945	Unpublished data
19JB73-1-11	JD	2-Low Nb/La group			5.60745	Unpublished data
19JB73-1-12	JD	2-Low Nb/La group			7.56916	Unpublished data
19JB73-1-13	JD	2-Low Nb/La group			4.15268	Unpublished data
19JB73-1-14	JD	2-Low Nb/La group			4.7799	Unpublished data
18QX10-3, Crystallization age t2 = 2569 Ma
18QX10-3-1	JD	2-Low Nb/La group			2.70758	Unpublished data
18QX10-3-2	JD	2-Low Nb/La group			7.64735	Unpublished data
18QX10-3-3	JD	2-Low Nb/La group			7.07982	Unpublished data
18QX10-3-4	JD	2-Low Nb/La group			5.10235	Unpublished data
18QX10-3-5	JD	2-Low Nb/La group			4.55614	Unpublished data
18QX10-3-6	JD	2-Low Nb/La group			8.85531	Unpublished data
18QX10-3-7	JD	2-Low Nb/La group			5.2802	Unpublished data
18QX10-3-8	JD	2-Low Nb/La group			10.6275	Unpublished data
18QX10-3-9	JD	2-Low Nb/La group			3.16579	Unpublished data
18QX10-3-10	JD	2-Low Nb/La group			6.01343	Unpublished data
18QX10-3-11	JD	2-Low Nb/La group			1.65686	Unpublished data
18QX10-3-12	JD	2-Low Nb/La group			4.58297	Unpublished data
18QX10-3-14	JD	2-Low Nb/La group			8.14026	Unpublished data
18QX10-3-15	JD	2-Low Nb/La group			6.69948	Unpublished data
17QX90-1, Crystallization age t2 = 2549 Ma
17QX90-1-1	JD	2-Low Nb/La group			8.67109	Unpublished data
17QX90-1-2	JD	2-Low Nb/La group			11.6426	Unpublished data
17QX90-1-3	JD	2-Low Nb/La group			9.11604	Unpublished data
17QX90-1-4	JD	2-Low Nb/La group			9.43554	Unpublished data
17QX90-1-5	JD	2-Low Nb/La group			3.80268	Unpublished data
17QX90-1-6	JD	2-Low Nb/La group			8.24204	Unpublished data
17QX87-1, Crystallization age t2 = 2493 Ma
17QX87-1-1	JD	2-Low Nb/La group			3.34058	Unpublished data
17QX87-1-2	JD	2-Low Nb/La group			2.80576	Unpublished data
17QX87-1-3	JD	2-Low Nb/La group			3.44245	Unpublished data
17QX87-1-4	JD	2-Low Nb/La group			4.87021	Unpublished data
17QX87-1-5	JD	2-Low Nb/La group			3.42061	Unpublished data
17QX87-1-6	JD	2-Low Nb/La group			2.20281	Unpublished data
17QX87-1-7	JD	2-Low Nb/La group			3.35894	Unpublished data
17QX87-1-8	JD	2-Low Nb/La group			4.63509	Unpublished data
17QX87-1-9	JD	2-Low Nb/La group			4.1601	Unpublished data
17QX87-1-10	JD	2-Low Nb/La group			3.85981	Unpublished data
17QX87-1-11	JD	2-Low Nb/La group			4.74746	Unpublished data
17QX87-1-12	JD	2-Low Nb/La group			5.42983	Unpublished data
17QX87-1-13	JD	2-Low Nb/La group			4.2209	Unpublished data
17QX87-1-14	JD	2-Low Nb/La group			4.70772	Unpublished data
17QX87-1-15	JD	2-Low Nb/La group			1.57555	Unpublished data
17QX87-1-16	JD	2-Low Nb/La group			3.0027	Unpublished data
17QX87-1-17	JD	2-Low Nb/La group			3.68527	Unpublished data
17QX87-1-18	JD	2-Low Nb/La group			2.9053	Unpublished data
17QX87-1-19	JD	2-Low Nb/La group			8.56343	Unpublished data
17QX87-1-20	JD	2-Low Nb/La group			6.8175	Unpublished data
17QX54-1, Crystallization age t2 = 2511 Ma
17QX54-1-01	JD	2-Low Nb/La group	0.281421	6e-05	7.22939	He et al., 2021
17QX54-1-02	JD	2-Low Nb/La group	0.281408	5.3e-05	6.66634	He et al., 2021
17QX54-1-03	JD	2-Low Nb/La group	0.281442	5.4e-05	8.2101	He et al., 2021
17QX54-1-04	JD	2-Low Nb/La group	0.28138	5.2e-05	5.55957	He et al., 2021
17QX54-1-05	JD	2-Low Nb/La group	0.281414	5.6e-05	6.99955	He et al., 2021
17QX54-1-06	JD	2-Low Nb/La group	0.281412	6.1e-05	6.43647	He et al., 2021
17QX54-1-07	JD	2-Low Nb/La group	0.28133	5.7e-05	4.31102	He et al., 2021
17QX54-1-08	JD	2-Low Nb/La group	0.281454	5.6e-05	8.69833	He et al., 2021
17QX54-1-09	JD	2-Low Nb/La group	0.281411	6e-05	6.34185	He et al., 2021
17QX54-1-10	JD	2-Low Nb/La group	0.281401	5.9e-05	6.06711	He et al., 2021
17QX54-1-11	JD	2-Low Nb/La group	0.28147	6.1e-05	8.31145	He et al., 2021
17QX54-1-12	JD	2-Low Nb/La group	0.281428	5.6e-05	7.0533	He et al., 2021
17QX54-1-13	JD	2-Low Nb/La group	0.281405	5.2e-05	6.58593	He et al., 2021
17QX54-1-14	JD	2-Low Nb/La group	0.28141	5.3e-05	6.83562	He et al., 2021
17QX54-1-15	JD	2-Low Nb/La group	0.281437	6e-05	7.49799	He et al., 2021
17QX54-1-16	JD	2-Low Nb/La group	0.281367	6e-05	5.7971	He et al., 2021
17QX54-1-17	JD	2-Low Nb/La group	0.281397	6.6e-05	7.0081	He et al., 2021
17QX54-1-18	JD	2-Low Nb/La group	0.281417	5.9e-05	6.76656	He et al., 2021
17QX54-1-19	JD	2-Low Nb/La group	0.281274	6.5e-05	2.58177	He et al., 2021
17QX54-1-20	JD	2-Low Nb/La group	0.28133	5e-05	4.42488	He et al., 2021
17QX58-2, Crystallization age t2 = 2530 Ma
17QX58-2-1	JD	2-Low Nb/La group			6.82921	Unpublished data
17QX58-2-2	JD	2-Low Nb/La group			1.96947	Unpublished data
17QX58-2-3	JD	2-Low Nb/La group			7.9937	Unpublished data
17QX58-2-4	JD	2-Low Nb/La group			5.94764	Unpublished data
17QX58-2-5	JD	2-Low Nb/La group			5.3558	Unpublished data
12LN76-2, Crystallization age t2 = 2558 Ma
12LN76-2-01	NNL	2-Low Nb/La group	0.281213	1.7e-05	1.45708	Wang et al., 2017
12LN76-2-02	NNL	2-Low Nb/La group	0.281279	1.5e-05	3.20781	Wang et al., 2017
12LN76-2-03	NNL	2-Low Nb/La group	0.281374	1.9e-05	7.2184	Wang et al., 2017
12LN76-2-04	NNL	2-Low Nb/La group	0.281346	9e-06	6.19638	Wang et al., 2017
12LN76-2-05	NNL	2-Low Nb/La group	0.28131	1.4e-05	4.69147	Wang et al., 2017
12LN76-2-06	NNL	2-Low Nb/La group	0.281206	2.2e-05	0.912318	Wang et al., 2017
12LN76-2-07	NNL	2-Low Nb/La group	0.281251	1.7e-05	2.68515	Wang et al., 2017
12LN76-2-08	NNL	2-Low Nb/La group	0.281298	1.3e-05	4.162	Wang et al., 2017
12LN76-2-09	NNL	2-Low Nb/La group	0.281306	1.4e-05	4.51962	Wang et al., 2017
12LN76-2-10	NNL	2-Low Nb/La group	0.281262	1.4e-05	2.79454	Wang et al., 2017
11JD66-2, Crystallization age t2 = 2613 Ma
11JD66-2-01	NEH-WL	2-Low Nb/La group	0.281309	2e-05	6.3502	Guo et al., 2017
11JD66-2-03	NEH-WL	2-Low Nb/La group	0.28123	2e-05	3.2216	Guo et al., 2017
11JD66-2-04	NEH-WL	2-Low Nb/La group	0.281261	3.6e-05	2.80201	Guo et al., 2017
11JD66-2-06	NEH-WL	2-Low Nb/La group	0.281284	3.6e-05	3.05642	Guo et al., 2017
11JD66-2-07	NEH-WL	2-Low Nb/La group	0.281246	2.5e-05	3.44752	Guo et al., 2017
11JD66-2-09	NEH-WL	2-Low Nb/La group	0.281277	2.7e-05	3.94561	Guo et al., 2017
11JD66-2-13	NEH-WL	2-Low Nb/La group	0.281293	2.1e-05	5.90731	Guo et al., 2017
11JD66-2-15	NEH-WL	2-Low Nb/La group	0.281309	2.1e-05	6.18481	Guo et al., 2017
12JD130-2, Crystallization age t2 = 2523 Ma
12JD130-2-01	NEH-WL	2-Low Nb/La group	0.281289	1e-05	3.60646	Guo et al., 2015
12JD130-2-02	NEH-WL	2-Low Nb/La group	0.281316	1.1e-05	3.81883	Guo et al., 2015
12JD130-2-03	NEH-WL	2-Low Nb/La group	0.281325	1e-05	4.05486	Guo et al., 2015
12JD130-2-04	NEH-WL	2-Low Nb/La group	0.2813	1.1e-05	3.77297	Guo et al., 2015
12JD130-2-05	NEH-WL	2-Low Nb/La group	0.28132	1.2e-05	3.80327	Guo et al., 2015
12JD130-2-06	NEH-WL	2-Low Nb/La group	0.281311	1.2e-05	4.13331	Guo et al., 2015
12JD130-2-07	NEH-WL	2-Low Nb/La group	0.281327	1.1e-05	4.02993	Guo et al., 2015
12JD130-2-08	NEH-WL	2-Low Nb/La group	0.281318	1.2e-05	4.63272	Guo et al., 2015
12JD130-2-09	NEH-WL	2-Low Nb/La group	0.281273	1.1e-05	3.18665	Guo et al., 2015
12JD130-2-10	NEH-WL	2-Low Nb/La group	0.281291	1.1e-05	3.18871	Guo et al., 2015
12JD130-2-11	NEH-WL	2-Low Nb/La group	0.281276	1.3e-05	2.95199	Guo et al., 2015
12JD130-2-12	NEH-WL	2-Low Nb/La group	0.281303	1.2e-05	4.03405	Guo et al., 2015
12JD130-2-13	NEH-WL	2-Low Nb/La group	0.281318	1.3e-05	4.2296	Guo et al., 2015
12JD130-2-14	NEH-WL	2-Low Nb/La group	0.281353	2.6e-05	5.48297	Guo et al., 2015
12JD130-2-15	NEH-WL	2-Low Nb/La group	0.281322	1.2e-05	3.79207	Guo et al., 2015
12JD130-2-16	NEH-WL	2-Low Nb/La group	0.28132	1.5e-05	4.09317	Guo et al., 2015
12JD130-2-17	NEH-WL	2-Low Nb/La group	0.281314	1.2e-05	3.87806	Guo et al., 2015
12JD130-2-18	NEH-WL	2-Low Nb/La group	0.281319	1.1e-05	4.15195	Guo et al., 2015
12JD130-2-19	NEH-WL	2-Low Nb/La group	0.281301	1e-05	4.02639	Guo et al., 2015
12JD130-2-20	NEH-WL	2-Low Nb/La group	0.281302	1.3e-05	3.88012	Guo et al., 2015
12JD36-2, Crystallization age t2 = 2558 Ma
12JD36-2-1	NEH-WL	2-Low Nb/La group	0.281338	1e-05	5.19848	Guo et al., 2015
12JD36-2-2	NEH-WL	2-Low Nb/La group	0.281392	1.1e-05	6.82166	Guo et al., 2015
12JD36-2-3	NEH-WL	2-Low Nb/La group	0.281392	1.1e-05	7.49325	Guo et al., 2015
12JD36-2-4	NEH-WL	2-Low Nb/La group	0.281342	1.1e-05	5.37381	Guo et al., 2015
12JD36-2-5	NEH-WL	2-Low Nb/La group	0.281383	1.2e-05	6.8704	Guo et al., 2015
12JD36-2-6	NEH-WL	2-Low Nb/La group	0.281367	1.1e-05	6.12383	Guo et al., 2015
12JD36-2-9	NEH-WL	2-Low Nb/La group	0.281354	1.3e-05	5.77975	Guo et al., 2015
12JD36-2-10	NEH-WL	2-Low Nb/La group	0.281347	1.1e-05	6.86875	Guo et al., 2015
12JD36-2-11	NEH-WL	2-Low Nb/La group	0.281378	1.1e-05	6.56032	Guo et al., 2015
12JD36-2-12	NEH-WL	2-Low Nb/La group	0.281442	1.4e-05	7.45349	Guo et al., 2015
12JD36-2-13	NEH-WL	2-Low Nb/La group	0.281429	1.3e-05	8.59354	Guo et al., 2015
12JD36-2-14	NEH-WL	2-Low Nb/La group	0.281326	9e-06	6.0557	Guo et al., 2015
12JD36-2-15	NEH-WL	2-Low Nb/La group	0.281357	1.2e-05	5.9317	Guo et al., 2015
12JD36-2-16	NEH-WL	2-Low Nb/La group	0.281326	1.6e-05	5.29015	Guo et al., 2015
12JD36-2-17	NEH-WL	2-Low Nb/La group	0.2814	1.6e-05	8.19711	Guo et al., 2015
12JD36-2-18	NEH-WL	2-Low Nb/La group	0.281376	1.1e-05	7.03899	Guo et al., 2015
12JD36-2-19	NEH-WL	2-Low Nb/La group	0.281343	9e-06	5.96615	Guo et al., 2015
12JD36-2-20	NEH-WL	2-Low Nb/La group	0.281398	1.3e-05	7.74146	Guo et al., 2015
11JD12-1, Crystallization age t2 = 2523 Ma
11JD12-1 02	NEH-WL	2-Low Nb/La group	0.281308	2e-05	3.86022	Guo et al., 2013
11JD12-1 03	NEH-WL	2-Low Nb/La group	0.281271	1.9e-05	2.968	Guo et al., 2013
11JD12-1 04	NEH-WL	2-Low Nb/La group	0.281327	1.9e-05	4.65261	Guo et al., 2013
11JD12-1 06	NEH-WL	2-Low Nb/La group	0.281281	2e-05	3.09379	Guo et al., 2013
11JD12-1 08	NEH-WL	2-Low Nb/La group	0.281315	2e-05	4.34076	Guo et al., 2013
11JD12-1 09	NEH-WL	2-Low Nb/La group	0.281323	2.1e-05	4.57211	Guo et al., 2013
11JD12-1 11	NEH-WL	2-Low Nb/La group	0.281306	3.4e-05	3.98465	Guo et al., 2013
11JD12-1 12	NEH-WL	2-Low Nb/La group	0.281309	2.9e-05	3.10328	Guo et al., 2013
11JD12-1 14	NEH-WL	2-Low Nb/La group	0.281276	2.8e-05	2.47854	Guo et al., 2013
11JD12-1 15	NEH-WL	2-Low Nb/La group	0.281345	2.1e-05	5.3494	Guo et al., 2013
11JD12-1 16	NEH-WL	2-Low Nb/La group	0.281313	2.7e-05	4.20959	Guo et al., 2013
11JD12-1 17	NEH-WL	2-Low Nb/La group	0.281325	2.4e-05	4.65696	Guo et al., 2013
11JD12-1 18	NEH-WL	2-Low Nb/La group	0.281283	2.8e-05	3.05514	Guo et al., 2013
11JD12-1 19	NEH-WL	2-Low Nb/La group	0.281279	2.7e-05	2.7482	Guo et al., 2013
11JD12-1 20	NEH-WL	2-Low Nb/La group	0.281355	2.2e-05	5.48549	Guo et al., 2013
11JD12-1 21	NEH-WL	2-Low Nb/La group	0.281339	2.4e-05	4.67114	Guo et al., 2013
11JD12-1 22	NEH-WL	2-Low Nb/La group	0.281326	2.5e-05	4.45237	Guo et al., 2013
11JD12-1 24	NEH-WL	2-Low Nb/La group	0.28135	2.4e-05	5.37456	Guo et al., 2013
11JD12-1 25	NEH-WL	2-Low Nb/La group	0.281304	2.3e-05	4.21542	Guo et al., 2013
11JD12-1 27	NEH-WL	2-Low Nb/La group	0.281281	2.1e-05	3.24817	Guo et al., 2013
11JD12-1 28	NEH-WL	2-Low Nb/La group	0.281324	2.1e-05	4.91472	Guo et al., 2013
11JD12-1 29	NEH-WL	2-Low Nb/La group	0.281341	2.5e-05	5.22773	Guo et al., 2013
12FX25-6, Crystallization age t2 = 2546 Ma
12FX25-6-01	NEH-WL	2-Low Nb/La group	0.281387	1.5e-05	4.54491	Wang et al., 2015
12FX25-6-02	NEH-WL	2-Low Nb/La group	0.281406	1.4e-05	5.58084	Wang et al., 2015
12FX25-6-03	NEH-WL	2-Low Nb/La group	0.2814	1.4e-05	5.60119	Wang et al., 2015
12FX25-6-04	NEH-WL	2-Low Nb/La group	0.281397	1.8e-05	5.84424	Wang et al., 2015
12FX25-6-05	NEH-WL	2-Low Nb/La group	0.281369	1.3e-05	5.0267	Wang et al., 2015
12FX25-6-06	NEH-WL	2-Low Nb/La group	0.281344	1.1e-05	5.81705	Wang et al., 2015
12FX25-6-07	NEH-WL	2-Low Nb/La group	0.281396	1e-05	5.16283	Wang et al., 2015
12FX25-6-08	NEH-WL	2-Low Nb/La group	0.281454	2.3e-05	6.61453	Wang et al., 2015
12FX25-6-09	NEH-WL	2-Low Nb/La group	0.281414	1.5e-05	7.5328	Wang et al., 2015
12FX25-6-10	NEH-WL	2-Low Nb/La group	0.281381	1.4e-05	5.83097	Wang et al., 2015
12FX25-6-11	NEH-WL	2-Low Nb/La group	0.281394	1.3e-05	6.19119	Wang et al., 2015
12FX25-6-12	NEH-WL	2-Low Nb/La group	0.281457	1.4e-05	6.21737	Wang et al., 2015
12FX25-6-13	NEH-WL	2-Low Nb/La group	0.281424	1.5e-05	6.2401	Wang et al., 2015
12FX25-6-14	NEH-WL	2-Low Nb/La group	0.28145	2.5e-05	6.79086	Wang et al., 2015
11JD67-1, Crystallization age t2 = 2543 Ma
11JD67-1-01	NEH-WL	1-High Nb/La group	0.28136	2.8e-05	6.34027	Guo et al., 2017
11JD67-1-02	NEH-WL	1-High Nb/La group	0.281406	2.6e-05	7.77403	Guo et al., 2017
11JD67-1-03	NEH-WL	1-High Nb/La group	0.281283	2.2e-05	3.58776	Guo et al., 2017
11JD67-1-04	NEH-WL	1-High Nb/La group	0.281335	2.2e-05	5.93878	Guo et al., 2017
11JD67-1-05	NEH-WL	1-High Nb/La group	0.281339	3.1e-05	5.83028	Guo et al., 2017
11JD67-1-06	NEH-WL	1-High Nb/La group	0.281262	2.9e-05	3.45132	Guo et al., 2017
11JD67-1-07	NEH-WL	1-High Nb/La group	0.281312	3e-05	4.48778	Guo et al., 2017
11JD67-1-08	NEH-WL	1-High Nb/La group	0.281275	3.1e-05	3.60413	Guo et al., 2017
11JD67-1-09	NEH-WL	1-High Nb/La group	0.281282	3.2e-05	3.54527	Guo et al., 2017
11JD67-1-10	NEH-WL	1-High Nb/La group	0.281344	3.2e-05	6.57709	Guo et al., 2017
11JD67-1-11	NEH-WL	1-High Nb/La group	0.281334	3.4e-05	5.17168	Guo et al., 2017
11JD67-1-12	NEH-WL	1-High Nb/La group	0.281285	3.3e-05	3.88025	Guo et al., 2017
11JD67-1-13	NEH-WL	1-High Nb/La group	0.281288	3.7e-05	3.92816	Guo et al., 2017
11JD67-1-14	NEH-WL	1-High Nb/La group	0.281374	2e-05	6.44737	Guo et al., 2017
11JD67-1-15	NEH-WL	1-High Nb/La group	0.281343	2.3e-05	5.09922	Guo et al., 2017
11JD67-1-16	NEH-WL	1-High Nb/La group	0.28136	2e-05	6.80202	Guo et al., 2017
11JD67-1-17	NEH-WL	1-High Nb/La group	0.281341	2.2e-05	5.69735	Guo et al., 2017
11JD67-1-19	NEH-WL	1-High Nb/La group	0.281389	2e-05	7.53601	Guo et al., 2017
11JD67-1-20	NEH-WL	1-High Nb/La group	0.28136	2.4e-05	5.86815	Guo et al., 2017
11JD67-1-21	NEH-WL	1-High Nb/La group	0.281375	1.9e-05	6.71813	Guo et al., 2017
11JD67-1-22	NEH-WL	1-High Nb/La group	0.281299	2.2e-05	4.70678	Guo et al., 2017
11JD67-1-23	NEH-WL	1-High Nb/La group	0.281456	2.5e-05	8.04437	Guo et al., 2017
11JD67-1-24	NEH-WL	1-High Nb/La group	0.281286	1.7e-05	4.49862	Guo et al., 2017
11JD67-1-25	NEH-WL	1-High Nb/La group	0.281347	2.4e-05	6.10099	Guo et al., 2017
OFX08-5, Crystallization age t2 = 2603 Ma
OFX08-5-1.1	NEH-WL	1-High Nb/La group	0.281292	2.3e-05	5.56599	Wang et al., 2015
OFX08-5-3.1	NEH-WL	1-High Nb/La group	0.281349	2.4e-05	7.56172	Wang et al., 2015
OFX08-5-4.1	NEH-WL	1-High Nb/La group	0.281395	2.9e-05	9.12364	Wang et al., 2015
OFX08-5-5.1	NEH-WL	1-High Nb/La group	0.281354	2.4e-05	7.53409	Wang et al., 2015
OFX08-5-6.1	NEH-WL	1-High Nb/La group	0.281323	2.8e-05	6.68113	Wang et al., 2015
OFX08-5-7.1	NEH-WL	1-High Nb/La group	0.281397	3.8e-05	8.71826	Wang et al., 2015
OFX08-5-8.1	NEH-WL	1-High Nb/La group	0.281238	3.1e-05	3.99761	Wang et al., 2015
OFX08-5-10.1	NEH-WL	1-High Nb/La group	0.281265	3.1e-05	4.02451	Wang et al., 2015
OFX08-5-11.1	NEH-WL	1-High Nb/La group	0.281233	3.8e-05	2.82066	Wang et al., 2015
12FX18-2, Crystallization age t2 = 2640 Ma
12FX18-2-01	NEH-WL	1-High Nb/La group	0.281261	9e-06	5.51663	Wang et al., 2015
12FX18-2-02	NEH-WL	1-High Nb/La group	0.281296	1.1e-05	6.19199	Wang et al., 2015
12FX18-2-03	NEH-WL	1-High Nb/La group	0.28128	1.5e-05	6.07932	Wang et al., 2015
12FX18-2-04	NEH-WL	1-High Nb/La group	0.281344	1.3e-05	7.16806	Wang et al., 2015
12FX18-2-05	NEH-WL	1-High Nb/La group	0.28129	1.1e-05	6.072	Wang et al., 2015
12FX18-2-06	NEH-WL	1-High Nb/La group	0.281298	1.2e-05	6.12654	Wang et al., 2015
12FX18-2-07	NEH-WL	1-High Nb/La group	0.281288	1.3e-05	6.5203	Wang et al., 2015
12FX18-2-08	NEH-WL	1-High Nb/La group	0.281247	1.3e-05	5.14439	Wang et al., 2015
12FX18-2-09	NEH-WL	1-High Nb/La group	0.2813	1.2e-05	7.224	Wang et al., 2015
12FX18-2-10	NEH-WL	1-High Nb/La group	0.281287	1.3e-05	5.85923	Wang et al., 2015
12FX18-2-11	NEH-WL	1-High Nb/La group	0.281316	1.1e-05	6.65006	Wang et al., 2015
12FX18-2-12	NEH-WL	1-High Nb/La group	0.281265	1.1e-05	5.88181	Wang et al., 2015
12FX18-2-13	NEH-WL	1-High Nb/La group	0.281302	1.1e-05	6.27603	Wang et al., 2015
12FX18-2-14	NEH-WL	1-High Nb/La group	0.281327	1.3e-05	7.07374	Wang et al., 2015
12FX18-2-15	NEH-WL	1-High Nb/La group	0.281386	1.4e-05	7.47055	Wang et al., 2015
12FX18-2-16	NEH-WL	1-High Nb/La group	0.281391	1.2e-05	9.75856	Wang et al., 2015
12FX18-2-17	NEH-WL	1-High Nb/La group	0.281321	1.1e-05	7.1964	Wang et al., 2015
12FX18-2-18	NEH-WL	1-High Nb/La group	0.281355	1.2e-05	7.59893	Wang et al., 2015
12FX18-2-19	NEH-WL	1-High Nb/La group	0.281324	1.3e-05	7.22224	Wang et al., 2015
14YZS-12, Crystallization age t2 = 2535 Ma
14YZS-12-4	WT	2-Low Nb/La group	0.281404	3.19186e-05	7.26915	Wang et al., 2019
14YZS-12-6	WT	2-Low Nb/La group	0.281416	3.36973e-05	7.32689	Wang et al., 2019
14YZS-12-7	WT	2-Low Nb/La group	0.281397	3.63824e-05	7.2546	Wang et al., 2019
14YZS-12-8	WT	2-Low Nb/La group	0.281399	2.86927e-05	6.98709	Wang et al., 2019
14YZS-12-16	WT	2-Low Nb/La group	0.281408	4.41287e-05	7.20081	Wang et al., 2019
14YZS-12-17	WT	2-Low Nb/La group	0.281488	4.5675e-05	9.84519	Wang et al., 2019
14YZS-12-18	WT	2-Low Nb/La group	0.281384	2.70037e-05	7.05874	Wang et al., 2019
14YZS-12-19	WT	2-Low Nb/La group	0.281524	4.66896e-05	11.0879	Wang et al., 2019
14YZS-12-21	WT	2-Low Nb/La group	0.281477	3.35379e-05	9.05284	Wang et al., 2019
14YZS-12-27	WT	2-Low Nb/La group	0.281405	3.65335e-05	7.61763	Wang et al., 2019
14YZS-12-31	WT	2-Low Nb/La group	0.281471	3.20805e-05	9.60218	Wang et al., 2019
14YZS-12-35	WT	2-Low Nb/La group	0.281441	3.94722e-05	8.44876	Wang et al., 2019
14YZS-12-39	WT	2-Low Nb/La group	0.281489	3.25219e-05	10.8019	Wang et al., 2019
14YZS-12-45	WT	2-Low Nb/La group	0.281355	4.78237e-05	5.57338	Wang et al., 2019
14YZS-12-46	WT	2-Low Nb/La group	0.2815	3.74525e-05	9.9794	Wang et al., 2019
14YZS-12-51	WT	2-Low Nb/La group	0.281479	3.06569e-05	10.145	Wang et al., 2019
15YZS-03, Crystallization age t2 = 2511 Ma
15YZS-03-3	WT	2-Low Nb/La group	0.281375	3.53502e-05	5.61596	Wang et al., 2019
15YZS-03-6	WT	2-Low Nb/La group	0.281394	3.50314e-05	6.44229	Wang et al., 2019
15YZS-03-10	WT	2-Low Nb/La group	0.281387	4.28544e-05	5.6586	Wang et al., 2019
15YZS-03-12	WT	2-Low Nb/La group	0.281391	3.71996e-05	5.28829	Wang et al., 2019
15YZS-03-14	WT	2-Low Nb/La group	0.281421	3.71924e-05	7.34203	Wang et al., 2019
15YZS-03-15	WT	2-Low Nb/La group	0.281469	3.2418e-05	8.79396	Wang et al., 2019
15YZS-03-28	WT	2-Low Nb/La group	0.281399	2.77727e-05	6.67233	Wang et al., 2019
15YZS-03-29	WT	2-Low Nb/La group	0.281401	3.88368e-05	6.7986	Wang et al., 2019
15YZS-03-33	WT	2-Low Nb/La group	0.281443	2.91031e-05	8.15828	Wang et al., 2019
15YZS-03-34	WT	2-Low Nb/La group	0.281373	3.6972e-05	4.88755	Wang et al., 2019
15YZS-03-35	WT	2-Low Nb/La group	0.281382	2.50797e-05	6.05238	Wang et al., 2019
15YZS-03-39	WT	2-Low Nb/La group	0.281361	1.71126e-05	5.50472	Wang et al., 2019
15YZS-03-42	WT	2-Low Nb/La group	0.281385	3.4498e-05	5.827	Wang et al., 2019
15YZS-03-43	WT	2-Low Nb/La group	0.28139	2.49631e-05	6.71575	Wang et al., 2019
GB31, Crystallization age t2 = 2490 Ma
GB31-1.1	NH	2-Low Nb/La group	0.281344	2.1e-05	4.55405	Ge et al., 2015
GB31-2.1	NH	2-Low Nb/La group	0.281324	3.4e-05	3.8428	Ge et al., 2015
GB31-3.1	NH	2-Low Nb/La group	0.281333	3.1e-05	4.33209	Ge et al., 2015
GB31-4.1	NH	2-Low Nb/La group	0.281266	1.9e-05	1.44169	Ge et al., 2015
GB31-5.1	NH	2-Low Nb/La group	0.281306	2.2e-05	3.20266	Ge et al., 2015
GB31-6.1	NH	2-Low Nb/La group	0.281306	2.2e-05	3.20266	Ge et al., 2015
GB31-7.1	NH	2-Low Nb/La group	0.281451	3.6e-05	6.66699	Ge et al., 2015
GB31-8.1	NH	2-Low Nb/La group	0.281302	2.7e-05	2.72195	Ge et al., 2015
GB31-9.1	NH	2-Low Nb/La group	0.281302	3.1e-05	2.3835	Ge et al., 2015
GB31-10.1	NH	2-Low Nb/La group	0.281309	2.7e-05	3.14012	Ge et al., 2015
GB31-11.1	NH	2-Low Nb/La group	0.281409	2.4e-05	6.69641	Ge et al., 2015
GB31-12.1	NH	2-Low Nb/La group	0.281271	4.1e-05	1.95796	Ge et al., 2015
Reference
Gao, L. et al. Late Neoarchean geodynamic evolution: Evidence from the metavolcanic rocks of the Western Shandong Terrane, North China Craton. Gondwana Res. 80, 303-320 (2020).
Gao, L. et al. A Ca. 2.8-Ga Plume-Induced Intraoceanic Arc System in the Eastern North China Craton. Tectonics 38, 1694-1717 (2019a).
Ge, S. et al. Zircon U–Pb geochronology and geochemistry of low-grade metamorphosed volcanic rocks from the Dantazi Complex: Implications for the evolution of the North China Craton. J. Asian Earth Sci. 111, 948-965 (2015).
Guo, B. et al. Neoarchean Andean-type active continental margin in the northeastern North China Craton: Geochemical and geochronological evidence from metavolcanic rocks in the Jiapigou granite-greenstone belt, Southern Jilin Province. Precambrian Res. 285, 147-169 (2016).
Guo, R. et al. Geochemistry, zircon U–Pb geochronology and Lu–Hf isotopes of metavolcanics from eastern Hebei reveal Neoarchean subduction tectonics in the North China Craton. Gondwana Res. 24, 664-686 (2013).
Guo, R. et al. Neoarchean subduction: A case study of arc volcanic rocks in Qinglong-Zhuzhangzi area of the Eastern Hebei Province, North China Craton. Precambrian Res. 264, 36-62 (2015).
Guo, R., Liu, S., Bai, X. & Wang, W. A Neoarchean subduction recorded by the Eastern Hebei Precambrian basement, North China Craton: Geochemical fingerprints from metavolcanic rocks of the Saheqiao-Shangying-Qinglong supracrustal belt. J. Asian Earth Sci. 135, 347-369 (2017).
He, X. et al. Late Neoarchean crustal growth under paired continental arc-back arc system in the North China Craton. Geosci. Front. 12, 101120 (2021).
Hu, Y., Liu, S., Sun, G. & Gao, L. Petrogenesis of the Neoarchean granitoids and crustal oxidation states in the Western Shandong Province, North China Craton. Precambrian Res. 334, 105446 (2019).
Jiang, N., Guo, J., Zhai, M. & Zhang, S. ∼2.7Ga crust growth in the North China craton. Precambrian Res. 179, 37-49 (2010).
Li, Z. & Wei, C. Two types of Neoarchean basalts from Qingyuan greenstone belt, North China Craton: Petrogenesis and tectonic implications. Precambrian Res. 292, 175-193 (2017).
Wang, C., Meng, E., Lin, S. & Li, Y. Late Neoarchean metavolcanic rocks from the Tonghua area, Southern Jilin Province, China: Constraints on the formation and evolution of the northeastern North China Craton. Precambrian Res. 362 (2021).
Wang, W. et al. Cyclic formation and stabilization of Archean lithosphere by accretionary orogenesis: Constraints from TTG and potassic granitoids, North China Craton. Tectonics 36, 1724-1742 (2017).
Wang, W. et al. Neoarchean intra-oceanic arc system in the Western Liaoning Province: Implications for Early Precambrian crustal evolution in the Eastern Block of the North China Craton. Earth-Sci Rev. 150, 329-364 (2015).
Wang, X., Zheng, Y.-F. & Zhu, W.-B. Geochemical constraints on the origin of Neoarchean magmatic rocks in the Lüliang Complex, North China Craton: Tectonic implications. Precambrian Res. 327, 212-231 (2019).
