# Supplementary material for: Two styles of Neoarchean slab subduction revealed by mantle oxygen fugacity
Source: Research Square preprint supplement (doi:10.21203/rs.3.rs-2820807/v1), 2023-05-02
Supplement: Supplementary file 2 [file 93dd13a9a6a82cb1f6a7841d.xlsx]

## Sheet: Slab dip of modern subduction
Sample location	fO2	SD	Slab dip (δ, deg)[1-4]	SD[1-4]	Upper plate type[2,3]
Modern arc primitive basalts
Honshu arc	-0.24	0.6	33.9	1.3	Continental
Ryukyu arc	0.18	0.262707	43.5	3	Continental
Kurile arc	0.240722	0.302047	50.4	1	Continental
Kamchatka arc	0.390011	0.381195	50.7	0.8	Continental
Sunda arc	0.403125	0.239986	49.3	0.5	Continental
Aleutian arc	0.406067	0.276881	53.7	1.4	Continental
Mariana arc	0.464279	0.471164	61.5	1.7	Oceanic
Izu-Bonin arc	0.763184	0.527651	62.8	1.2	Oceanic
Vanuatu arc	0.87	0.76	71.3	5.7	Oceanic
Reference
[1]	England, P., Engdahl, R. & Thatcher, W. Systematic variation in the depths of slabs beneath arc volcanoes. Geophys. J. Int. 156, 377-408 (2004).
[2]	Syracuse, E. M. & Abers, G. A. Global compilation of variations in slab depth beneath arc volcanoes and implications. Geochem. Geophy. Geosy. 7, Q05017 (2006).
[3]	Syracuse, E. M., van Keken, P. E. & Abers, G. A. The global range of subduction zone thermal models. Phys. Earth. Planet. In. 183, 73-90 (2010).
[4]	Wada, I. & Wang, K. Common depth of slab-mantle decoupling: Reconciling diversity and uniformity of subduction zones. Geochem. Geophy. Geosy. 10, Q10009 (2009).

## Sheet: Slab dip of Archean subduction
Sample location	fO2	SD	Slab dip (δ, deg)	SD	Mantle potential temperature (TP, ℃)[1]	SD	Lithospheric thickness (km)
ca. 2.8-2.7 Ga primitive basalts in the NCC (Slab dip is calculated by y = 1.41ln (x) - 5.18 (R2 = 0.91); y is slab dip and x is mantle fO2; Mantle potential temperature is calculated by Herzberg’s function: TP = 1463 + 12.74MgO - 2924/MgO; MgO is the primary magma contents that equilibrate with olivine Fo = 91)
JD	-1.5	0.61	13.4736	5.79364	1486.74	36.7905	137-147
WS	-0.86	0.62	21.2365	9.32953	1489.94	55.5221	135-149
ca. 2.6-2.5 Ga primitive basalts in the NCC
JD	0.4	0.26	51.7586	9.6615	1481.05	59.1992	91-101
SNL	0.35	0.49	49.9834	17.4951	1494.75	32.293	95-100
WS	0.31	0.55	48.4802	18.6983	1468.02	49.7837	91-99
NEH-WL	-1.52	0.62	13.2403	5.81667	1496.12	33.5546	131-140
NH	-1.32	0.37	15.2511	3.94766	1505.16	49.1673	131-143
NNL	-1.35	0.51	14.9344	5.34706	1500.28	47.0146	130-142
WT	-1.43		14.1226		1516.57	39.3137	134-143
ZH	-1.31	0.29	15.3711	3.12151	1544.94	46.2698	136-147
Global Archean low Nb/La samples[2]
Dharwar Craton (2.6-2.5 Ga)	-0.54	0.36	26.6063	6.73002
Dharwar Craton (2.8-2.7 Ga)	-1.72	0.5	11.5658	4.05042
Dharwar Craton (3.4 Ga)	-2	0.8	9.44956	5.32323
Tanzania Craton (28-27)	-0.555143	0.59304	26.2794	11.0249
Superior Province (2.8-2.7 Ga)	-0.68	0.61	24.0314	10.3515
Superior Province (3.0-2.9 Ga)	-1.46	0.59	13.8267	5.73983
Yilgarn Craton (2.8-2.7 Ga)	-0.75	0.59	22.9707	9.53757
Yilgarn Craton (3.0-2.9 Ga)	-0.68	0.75	24.0436	12.7993
North Atlantic Craton (3.0 Ga)	-0.78	0.79	22.4604	12.6164
North Atlantic Craton (3.1 Ga)	-0.98	0.51	19.4794	6.98967
North Atlantic Craton (3.2 Ga)	-1.62	0.82	12.399	7.20679
North Atlantic Craton (3.7 Ga)	-2	0.77	9.43313	5.1487
Pilbarn Craton (3.2 Ga)	-0.39	0.34	29.5622	7.16804
Pilbarn Craton (3.5 Ga)	-2.08	0.4	8.94016	2.5393
Kappvaal Craton (3.1 Ga)	-0.74	0.32	22.9929	5.18155
Kappvaal Craton (3.4 Ga)	-1.66	0.74	12.0169	6.31177
Reference
[1]	Herzberg, C., Condie, K. & Korenaga, J. Thermal history of the Earth and its petrological expression. Earth Planet. Sci. Lett. 292, 79-88 (2010).
[2]	Gao, L. et al. Oxidation of Archean upper mantle caused by crustal recycling. Nat. Commun. 13, 3283 (2022).
