# Supplementary material for: Two styles of Neoarchean slab subduction revealed by mantle oxygen fugacity
Source: Research Square preprint supplement (doi:10.21203/rs.3.rs-2820807/v1), 2023-05-02
Supplement: Supplementary file 3 [file b7592c8c6b2a10068fa88ad9.xlsx]

## Sheet: A. Modern arc basalt
Sample No.	Location	SiO2 (wt. %)	TiO2	Al2O3	TFeO	MnO	MgO	CaO	Na2O	K2O	Ti (ppm)	V	Reference	2 wt.% H2O	T (℃)	P (GPa)	fO2
s_SH-15	Aleutian arc	49.151	1.19093	15.4013	9.81002	0.161482	8.609	11.0514	2.63417	0.716575	7137.81	300	[4867]		1313.24	1.43097	0.209
s_46ABY531	Aleutian arc	47.7917	0.725774	15.5196	9.03738	0.169016	12.6066	10.6977	1.84923	0.477221	4349.92	309	[6565]		1285.52	1.27626	0.714
s_03TGGM108	Aleutian arc	49.3582	0.821152	15.8294	9.53724	0.168188	8.20163	11.7138	2.36452	0.797408	4921.57	288	[16078]		1303.62	1.33363	0.288
s_TN182_08_001	Aleutian arc	51.7159	0.724202	17.7479	7.13289	0.158729	8.96819	8.6805	3.21426	0.69444	4340.49	196	[19452]		1201.6	0.812216	-0.196
s_TN182_08_003	Aleutian arc	51.3625	0.714194	17.6267	7.15186	0.14879	9.64162	8.66953	3.1246	0.605081	4280.52	194	[19452]		1202.98	0.823287	-0.045
s_TN182_12_002	Aleutian arc	50.884	0.822789	17.9328	7.89084	0.15861	8.31711	8.98129	3.24159	0.733571	4931.38	217	[19452]		1234.29	1.0094	0.011
s_TN182_08_011	Aleutian arc	51.4534	0.724138	17.6571	7.21162	0.158715	9.31459	8.64005	3.20406	0.674539	4340.11	195	[19452]		1205.38	0.842159	0.018
s_TN182_08_014	Aleutian arc	51.6641	0.71425	18.005	7.08298	0.158722	8.70988	8.84876	3.22404	0.634889	4280.85	194	[19452]		1201.03	0.810722	0.068
s_TN182_08_007	Aleutian arc	51.7573	0.724226	17.8675	7.01408	0.158734	8.99826	8.75023	3.15485	0.634938	4340.64	197	[19452]		1197.02	0.781037	0.139
s_TN182_08_016	Aleutian arc	51.5212	0.724113	18.0433	7.33041	0.15871	8.67944	8.84807	3.15436	0.565404	4339.97	195	[19452]		1210.25	0.840088	0.211
s_TN182_08_010	Aleutian arc	51.5096	0.714171	17.884	7.18138	0.158705	8.88746	8.83786	3.23361	0.634818	4280.37	195	[19452]		1205.62	0.839748	0.283
s_SO201-1B-15-003	Aleutian arc	51.2826	0.733741	15.7854	7.59521	0.148731	10.0245	9.5188	2.96471	0.852726	4397.67	210	[19452]		1219.05	0.877406	0.283
s_SO201-1B-21-005	Aleutian arc	50.2061	0.822726	17.5052	7.87041	0.158598	9.21849	9.3077	3.19178	0.67404	4931	226	[19452]		1233.99	1.04656	0.363
s_SO201-1B-20-012	Aleutian arc	51.3715	0.8033	17.0875	7.5173	0.148759	9.27266	8.78671	3.24295	0.763631	4814.57	213	[19452]		1215.26	0.893197	0.385
s_SO201-1B-15-002	Aleutian arc	51.4871	0.773497	16.2038	7.48705	0.148749	8.92496	9.99596	3.00474	0.88258	4635.94	223	[19452]		1218.48	0.870134	0.448
s_TN182_07_002	Aleutian arc	51.5849	0.724033	17.0197	7.42878	0.158692	9.02562	9.04546	3.11434	0.912481	4339.49	202	[19452]		1214.03	0.874495	0.451
s_TN182_08_012	Aleutian arc	51.4438	0.71436	17.5713	7.21305	0.148825	9.51487	8.56239	3.19477	0.674673	4281.51	193	[19452]		1204.89	0.839231	0.458
s_SO201-1B-16-007	Aleutian arc	51.4418	0.773411	16.2416	7.58538	0.158648	8.64634	10.0543	3.04407	0.951891	4635.43	222	[19452]		1222.43	0.90137	0.485
s_TN182_08_015	Aleutian arc	51.7083	0.724234	18.0364	7.09352	0.148815	8.75033	8.81978	3.19456	0.585339	4340.69	195	[19452]		1201.5	0.801697	0.5
s_SO201-1B-15-005	Aleutian arc	51.3593	0.773514	16.2339	7.55663	0.148753	8.81607	10.0656	3.01472	0.932183	4636.05	222	[19452]		1221.63	0.898587	0.521
s_TN182_08_002	Aleutian arc	51.7602	0.724266	18.0868	7.05415	0.148822	8.63166	8.78048	3.284	0.625051	4340.88	197	[19452]		1198.97	0.803499	0.523
s_SO201-1B-21-004	Aleutian arc	50.1912	0.822644	17.5431	7.86963	0.158582	9.19776	9.30678	3.19146	0.673973	4930.51	225	[19452]		1233.58	1.04592	0.558
s_SO201-1B-18-002	Aleutian arc	50.6731	0.822744	17.575	7.85076	0.158601	8.57438	9.39712	3.20176	0.723618	4931.11	229	[19452]		1232.15	1.00805	0.598
s_TN182_08_004	Aleutian arc	51.8997	0.724274	17.8886	6.95501	0.148823	8.76074	8.71113	3.29396	0.674666	4340.93	195	[19452]		1196.43	0.789161	0.629
s_TN182_08_008	Aleutian arc	51.7747	0.753664	17.9788	7.3978	0.158666	8.13163	8.93488	3.19315	0.684247	4517.08	204	[19452]		1212.04	0.843522	0.678
s_TN182_08_005	Aleutian arc	51.5053	0.714249	18.1142	7.17225	0.158722	8.62059	8.9182	3.2042	0.634888	4280.85	193	[19452]		1204.57	0.833501	0.777
s_TN182_09_003	Aleutian arc	49.8421	0.86208	17.9352	8.1749	0.18827	8.71989	9.24507	3.18078	0.76299	5166.87	250	[19452]		1248.25	1.14965	0.832
s_TN182_09_005	Aleutian arc	49.9076	0.852275	17.9077	8.06688	0.178383	8.91915	9.16691	3.20098	0.733352	5108.1	243	[19452]		1242.74	1.11903	0.855
s_GS80-R13	Aleutian arc	48.3047	0.792908	17.0609	9.75094	0.173227	10.5158	8.15072	2.72126	1.35413	4752.28	291.95	[22260]		1308.59	1.59713	0.239
s_4	Honshu arc	48.1977	1.71992	15.3593	10.6395	0.19999	9.30955	9.11956	2.65987	1.09995	10308.3	211	[3187]		1344.06	1.74301	-0.558
s_1	Honshu arc	51.3813	0.860022	15.8104	7.7902	0.160004	10.3503	9.63024	2.45006	0.560014	5154.53	206	[3187]		1224.1	0.796843	0.59
s_TKKA	Honshu arc	49.5614	1.24355	15.1432	10.0386	0.180515	9.55727	9.24638	2.82807	0.762175	7453.19	233	[3511]		1315.15	1.43051	-0.551
s_TKKB	Honshu arc	49.8702	1.21733	15.7347	10.463	0.160969	8.6722	8.71244	2.92762	0.704239	7296.04	231	[3511]		1329.22	1.48147	-0.518
s_KTZA	Honshu arc	48.7686	1.39339	15.1354	10.1475	0.181746	9.53158	9.55178	2.80697	0.979411	8351.26	257	[3511]		1324.46	1.58303	-0.127
s_UBS-15	Honshu arc	50.0667	1.19112	15.2066	9.40983	0.158816	9.38998	9.91606	2.51127	0.823857	7138.95	230	[3574]		1290.66	1.22484	-0.029
s_1	Honshu arc	50.8748	1.04949	16.6798	7.43813	0.13246	9.37408	9.00727	2.95487	1.30422	6290.11	176	[4140]		1215.23	0.947492	0.264
s_6	Honshu arc	51.2861	0.873387	17.5185	6.99725	0.132024	8.82527	8.95729	3.27012	1.04603	5234.63	165	[4140]		1201.32	0.880536	0.281
s_9	Honshu arc	51.7472	0.902805	17.4611	7.22244	0.133369	8.50484	8.62795	3.1906	1.10799	5410.95	174	[4140]		1206.27	0.861319	0.441
s_KM89-31	Honshu arc	48.9922	1.5922	13.6573	10.018	0.16812	10.5817	9.78065	2.72948	1.01861	9542.82	196	[6615]		1320.2	1.52646	-0.59
s_KM89-57	Honshu arc	51.3114	1.31746	13.6897	8.55851	0.148585	11.0547	9.13304	2.42689	1.17878	7896.16	187	[6615]		1250.99	0.960128	0.117
s_Y85-1	Honshu arc	51.3021	0.812903	15.8318	7.68293	0.148702	10.6074	9.49709	2.52793	0.57498	4872.13	208	[6823]		1220.54	0.800245	0.283
s_OB-6	Honshu arc	50.2049	0.726273	14.7096	9.35089	0.194355	10.2497	10.5565	2.02538	0.828565	4352.91	160	[7275]		1286.15	1.12383	-1.574
s_KK1-13	Honshu arc	47.6922	1.61008	13.6806	12.4406	0.180008	13.5806	7.11033	1.84009	0.330016	9649.97	238	[8432]		1409.48	1.98566	-1.159
s_IK-6	Honshu arc	50.2446	1.10787	17.4727	7.92392	0.147716	9.86534	8.71526	2.20519	1.20283	6640.02	213	[8706]		1230.5	0.965719	0.268
s_IK-15	Honshu arc	50.0643	1.16551	17.4301	7.99056	0.157501	8.86206	9.00906	3.19202	1.00801	6985.46	224	[8706]		1240.93	1.12349	0.592
s_SW-01S	Honshu arc	49.5126	0.608139	16.3184	7.11522	0.121628	9.2133	14.1189	1.57102	0.496646	3644.87	220	[8706]		1215.81	0.723013	0.638
s_SR-01	Honshu arc	50.9895	1.06505	15.9861	8.25418	0.153614	8.42827	11.224	2.19156	0.573491	6383.4	259	[8706]		1246.96	0.879916	0.692
s_SW-01N	Honshu arc	49.5058	0.913542	16.5053	7.86262	0.123174	8.4477	12.6048	2.12475	0.862219	5475.3	253	[8706]		1242.45	0.991428	0.693
s_01080901-10	Honshu arc	50.6111	0.711235	14.0804	8.74098	0.144309	12.2353	10.1531	1.77293	0.432926	4262.78	229	[9710]		1260.97	0.879379	-0.337
s_T50	Honshu arc	51.9389	0.68813	15.5378	9.029	0.149594	8.3174	9.60391	2.70266	0.92748	4124.3	185	[10193]		1267.99	1.00723	-1.495
s_T52	Honshu arc	51.8764	0.678384	15.4233	8.8134	0.139667	8.50973	9.92636	2.59382	0.937767	4065.89	193	[10193]		1263.51	0.97986	-1.409
s_T92	Honshu arc	51.2327	0.522885	13.6151	9.35398	0.150832	11.7649	10.0153	1.76976	0.452497	3133.91	197	[10193]		1280.88	0.918115	-1.245
s_T02	Honshu arc	51.2266	0.808054	15.2433	9.68631	0.14964	8.76888	9.40734	2.63366	0.877885	4843.06	225	[10193]		1294.17	1.16894	-0.567
s_T05	Honshu arc	51.1946	0.827649	15.0473	9.75679	0.149575	8.94459	9.3634	2.60261	0.89745	4960.5	222	[10193]		1298.08	1.18823	-0.477
s_T65	Honshu arc	51.4458	0.758489	14.7551	9.63744	0.161811	8.52542	10.3053	2.27547	0.940527	4546	244	[10193]		1293.46	1.10474	-0.145
s_KM06	Honshu arc	49.2123	1.21964	13.8124	10.4622	0.162618	11.3833	9.23874	2.43927	0.731782	7309.88	182	[11716]		1330.01	1.48445	-1.277
s_KM02	Honshu arc	51.4266	1.4316	15.2536	9.23477	0.151225	8.69039	8.55933	2.89344	1.10898	8580.26	199	[11716]		1277	1.12722	0.156
s_02110723	Honshu arc	50.8835	1.16122	14.8656	10.5611	0.160168	9.01949	8.80926	2.68282	0.530558	6959.77	194	[13305]		1327.04	1.3248	-0.767
s_03102152	Honshu arc	50.6354	1.34394	15.3998	9.91285	0.191992	8.59922	9.67034	2.41506	0.485033	8054.92	220	[13305]		1305.99	1.20099	-0.294
s_02110934	Honshu arc	50.2468	1.2228	14.3475	9.6601	0.17323	10.618	9.27288	2.4354	0.733678	7328.82	209	[13305]		1297.43	1.21783	-0.29
s_02111173B	Honshu arc	48.4162	1.4891	14.2382	10.0361	0.173388	9.81174	11.1275	2.50903	0.805746	8924.91	285	[13305]		1326.38	1.56119	-0.166
s_031027E4	Honshu arc	46.8934	1.83698	13.9691	10.2951	0.171586	10.9108	11.5871	1.948	0.968955	11009.9	292	[13305]		1341.99	1.74926	0.11
s_5072004	Honshu arc	49.8634	0.756271	17.1321	10.729	0.18453	8.84332	9.2265	1.85538	0.141171	4532.7	253	[13465]		1334.14	1.31323	-0.424
s_KM53	Honshu arc	50.9493	1.34606	14.887	10.2227	0.170768	8.51833	9.2215	2.64189	0.683074	8067.58	145	[13663]		1316.65	1.27853	-1.186
s_T101	Honshu arc	48.5171	0.705131	14.8534	10.024	0.170449	12.1952	10.1052	2.02915	0.213061	4226.2	235	[13668]		1319.19	1.37431	-0.749
s_T102	Honshu arc	49.332	0.645079	15.2062	9.35918	0.172088	11.2511	10.8285	1.93222	0.171082	3866.28	269.63	[13668]		1288.79	1.11659	0.234
s_43001	Honshu arc	51.5385	1.36863	14.8851	9.61824	0.14985	8.76124	9.02098	2.5974	0.649351	8202.88	207	[13757]		1291.29	1.08827	-0.301
s_111801	Honshu arc	49.8649	1.88132	13.3794	10.6881	0.180126	9.78685	9.58671	2.30161	0.810567	11275.7	297	[13757]		1336.7	1.43991	0.001
s_M-3	Honshu arc	48.9035	1.09424	17.5693	8.85622	0.163625	9.52095	9.71525	2.81231	0.255665	6558.34	211.49	[16193]		1274.43	1.24307	-0.044
s_TI-53	Honshu arc	49.9868	0.782297	17.712	7.80291	0.160471	8.79583	10.7716	2.37698	0.591738	4688.69	231.45	[16193]		1234.83	0.953177	0.33
s_TI-11	Honshu arc	49.8454	0.786298	17.9853	7.51462	0.149297	8.77867	10.829	2.50819	0.617095	4712.67	242.72	[16193]		1225.83	0.948009	0.498
s_TI-52	Honshu arc	49.7826	0.787316	17.8862	7.62082	0.161501	8.84217	10.871	2.4326	0.615722	4718.77	241.45	[16193]		1227.48	0.947645	0.503
s_TI-10	Honshu arc	50.1349	0.785088	17.7651	7.79049	0.150978	8.68629	10.7597	2.32507	0.593849	4705.42	236.16	[16193]		1231.53	0.920704	0.629
s_W-11	Honshu arc	50.049	0.779206	17.8918	7.64221	0.149847	8.51133	10.9588	2.34761	0.669318	4670.16	245.34	[16193]		1228.47	0.926286	0.793
s_W275	Honshu arc	51.3128	0.863853	16.6063	8.08973	0.152445	9.50238	9.32961	2.79482	0.335378	5177.49	155.1	[17004]		1234.14	0.866455	-0.52
s_W272	Honshu arc	51.9576	0.868857	16.774	8.07525	0.153328	8.3308	9.55742	2.80078	0.449761	5207.48	180.7	[17004]		1234.57	0.835627	0.103
s_T92	Honshu arc	51.234	0.522899	13.6155	9.35184	0.150836	11.7652	10.0155	1.76981	0.452509	3133.99	242.9	[18038]		1280.88	0.91807	0.057
s_TM11	Honshu arc	50.3123	0.722618	16.1987	8.7216	0.160582	9.73527	10.3475	2.41876	0.321164	4331	240	[19989]		1263.77	1.01565	-0.377
s_TM13	Honshu arc	49.353	0.687424	15.5277	9.26	0.181965	10.8573	10.645	2.15325	0.232511	4120.07	244	[19989]		1284.63	1.13849	-0.084
s_IW03	Honshu arc	51.1032	0.767645	16.7785	9.46097	0.16948	8.26465	10.3682	1.88422	0.0697859	4600.87	257.23	[19989]		1286.32	0.963029	0.071
s_TM12	Honshu arc	50.4099	0.726629	16.2987	8.77001	0.161473	9.38562	10.4655	2.4221	0.302762	4355.04	249	[19989]		1265.12	1.0125	0.282
s_IW05	Honshu arc	51.0099	0.779999	16.85	9.51999	0.17	8.16999	10.42	1.89	0.0499999	4674.92	267.71	[19989]		1289.32	0.983641	0.35
s_TM10	Honshu arc	50.2685	0.736572	16.2954	8.85905	0.16144	9.36355	10.534	2.41152	0.302701	4414.64	255	[19989]		1270.11	1.04581	0.568
s_SMG01	Honshu arc	49.4336	0.855601	16.4175	8.54594	0.17112	9.43174	10.7906	2.23463	1.00659	5128.03	270	[19989]		1262.41	1.13992	0.722
s_FK-106	Honshu arc	48.9588	1.36219	17.5182	9.25491	0.150242	8.12308	9.34505	3.11502	0.851371	8164.29	173	[20942]		1291.07	1.4218	-0.765
s_FK-72	Honshu arc	49.4354	1.41044	17.1753	9.24287	0.16005	8.19254	9.10283	3.11097	0.860267	8453.44	183	[20942]		1289.85	1.37235	-0.42
s_IW28	Honshu arc	50.9004	0.796532	16.9087	9.61039	0.169389	8.24259	10.371	1.73926	0.107885	4774	252.108	[21481]		1290.87	0.98624	-0.727
s_18.08/1	Izu-Bonin arc	49.4759	0.994542	17.0077	9.05133	0.180826	8.21753	11.0806	2.48133	0.321468	5960.78	261	[2311]		1282.2	1.18196	0.278
s_D894-2	Izu-Bonin arc	50.0905	0.89161	15.7284	8.88752	0.16029	8.16475	12.3723	2.22402	0.380688	5343.86	261	[3195]		1275.83	1.05142	0.347
s_D609-6	Izu-Bonin arc	48.7975	0.95034	16.856	9.96816	0.190068	8.50304	11.234	1.99071	0.250089	5695.85	320	[3195]		1318.71	1.3552	0.523
s_D643-1	Izu-Bonin arc	49.3749	1.12055	16.7073	9.97233	0.181711	8.24765	10.2465	2.32186	0.524942	6716.01	316	[3195]		1314.01	1.35692	0.528
s_102-3	Izu-Bonin arc	47.1653	0.949905	15.4185	9.70787	0.189981	8.69913	14.3086	1.43986	0.809919	5693.25	380	[4797]		1325.59	1.49541	0.933
s_33-1	Izu-Bonin arc	49.02	0.66	14.39	9.12397	0.18	10.29	13.56	1.41	0.23	3955.7	310	[6364]		1286.98	1.01817	1.279
s_780/127	Izu-Bonin arc	51.9181	0.581771	16.1993	8.87703	0.18055	8.1448	10.8129	1.91583	0.341038	3486.84	287	[10427]		1263.36	0.828643	1.409
s_E2104	Izu-Bonin arc	50.3083	0.671178	14.6757	9.48664	0.170299	10.6988	11.0293	1.75308	0.0901582	4022.7	288	[12116]		1290.13	0.997148	0.138
s_F2002-2	Izu-Bonin arc	50.1574	0.638948	14.2765	9.54429	0.159737	11.3613	10.6924	1.91685	0.129786	3829.53	276	[12116]		1292	1.04303	0.412
s_D366	Izu-Bonin arc	48.2821	0.932508	16.7951	9.47388	0.525776	10.4064	11.0512	1.25988	0.0694421	5588.97	294.1	[14052]		1296.11	1.15992	0.562
s_37-2	Izu-Bonin arc	49.3599	1.0438	16.3797	9.24368	0.190695	8.84222	11.3714	2.12775	0.250914	6256.03	289	[14052]		1286.94	1.15072	0.62
s_64-2	Izu-Bonin arc	47.4756	0.900246	16.9959	9.44764	0.187963	8.09232	13.6422	1.76092	0.296784	5395.62	339.4	[14052]		1312.1	1.39222	0.913
s_R1	Izu-Bonin arc	50.284	0.719293	13.9214	9.59057	0.165216	10.9264	11.3445	1.8214	0.106786	4311.08	278.525	[15499]		1296.7	1.03235	-0.047
s_R7	Izu-Bonin arc	50.2129	0.756077	14.4984	10.0085	0.174293	8.65556	12.1665	2.31062	0.0479282	4531.54	302.107	[15499]		1314.32	1.19558	0.305
s_R19	Izu-Bonin arc	50.141	0.644275	15.166	8.67215	0.173852	10.1755	12.2208	1.72829	0.0715861	3861.46	272.167	[15499]		1261.81	0.864773	0.417
s_R8	Izu-Bonin arc	50.0298	0.855324	14.4657	9.98674	0.185207	8.92711	11.7894	2.45838	0.132581	5126.37	299.15	[15499]		1316.52	1.2604	0.6
s_R5	Izu-Bonin arc	50.2899	0.782695	14.1282	10.1353	0.15869	9.44978	12.0286	1.75033	0.090497	4691.08	321.532	[15499]		1315.85	1.11673	0.851
s_UJ-12	Izu-Bonin arc	51.0748	0.736882	15.4133	9.5373	0.153601	9.94991	9.92783	1.70266	0.313225	4416.49	226.883	[15968]		1286.04	0.950429	-0.077
s_ANE-01B	Izu-Bonin arc	50.7345	0.584294	15.1718	8.59605	0.138646	9.51706	11.8542	1.98066	0.257485	3501.96	259	[18360]		1258.74	0.863992	0.709
s_ANE-04	Izu-Bonin arc	51.1331	0.584661	15.2706	8.21498	0.148643	9.72123	11.9707	1.83326	0.118914	3504.16	266	[18360]		1241.92	0.727448	0.842
s_07112202-1	Izu-Bonin arc	51.0369	0.574561	15.1763	8.50945	0.168406	9.37129	11.5408	2.19918	0.257562	3443.63	276	[18360]		1254.23	0.854147	1.254
s_HR-03B	Izu-Bonin arc	49.7866	0.574422	14.7666	8.54701	0.158461	10.4485	12.7858	1.74307	0.12875	3442.79	302	[18360]		1261.55	0.883538	1.946
s_HR-03A	Izu-Bonin arc	50.0694	0.584622	14.9723	8.27389	0.158542	10.4836	12.6041	1.59533	0.128815	3503.93	309	[18360]		1250.18	0.792019	2.349
s_DT-1 174 R04	Izu-Bonin arc	49.6687	0.59938	11.9277	9.0906	0.159835	12.0775	13.7558	1.3586	0.279711	3592.38	256.8	[22497]		1283.72	0.896047	0.381
s_DT-1 167 R01	Izu-Bonin arc	47.8314	0.682159	16.4721	9.49004	0.17054	8.26617	14.0746	1.59505	0.280889	4088.52	338.8	[22497]		1310.01	1.3077	1.369
s_DT-1174 R05	Izu-Bonin arc	50.1627	0.699898	13.3181	9.28865	0.169975	9.97855	13.2281	1.68975	0.339951	4194.83	309.1	[22607]		1289.24	0.985347	0.34
s_352-U1441A-19R-1-W 44/47	Izu-Bonin arc	48.4953	0.465254	16.1552	9.06751	0.148485	8.82003	13.7695	1.50465	0.485052	2788.5	263.72	[22853]		1289.88	1.15158	1.754
s_352-U1440B-12R-2 9-11	Izu-Bonin arc	50.2912	0.587624	15.5775	8.91965	0.16661	8.19681	13.1522	1.60624	0.436977	3521.92	292	[23023]		1275.42	0.945012	1.056
s_29M	Kamchatka arc	48.9618	1.14676	15.4564	9.51314	0.179493	9.93196	10.0716	2.67245	0.767832	6873.11	274	[2475]		1300.03	1.39306	0.396
s_TB-9-7-75	Kamchatka arc	50.0694	0.926838	13.2981	9.24823	0.191412	9.72172	12.1899	2.38761	0.755574	5554.99	284	[2475]		1289.47	1.16478	0.522
s_3/OB	Kamchatka arc	50.2	1.15691	14.0842	9.59736	0.181082	9.49676	10.2613	2.45467	1.16697	6933.95	284	[2475]		1298.72	1.27837	0.57
s_7-889	Kamchatka arc	50.0782	1.25196	12.917	10.1945	0.188787	10.9298	9.38967	2.335	1.23208	7503.58	303	[2481]		1316.15	1.36214	0.185
s_8845	Kamchatka arc	51.9855	1.05376	14.4516	8.59065	0.160573	8.17918	10.0258	2.90035	1.40501	6315.7	310	[2481]		1257.84	1.0259	1.215
s_K-12-7	Kamchatka arc	51.1472	0.799956	13.3993	8.57953	0.169991	11.7894	10.1294	2.35987	0.559969	4794.53	257	[2485]		1255.18	0.90298	0.483
s_K-9-80-7023	Kamchatka arc	51.5538	0.818156	13.8588	8.4709	0.15964	11.0152	10.0873	2.3946	0.578695	4903.61	256	[2485]		1249.78	0.860424	0.602
s_K-23-81959	Kamchatka arc	51.8189	0.927117	15.7012	8.4238	0.159504	8.25433	10.0787	2.90098	0.657954	5556.67	261	[2485]		1249.45	0.931392	0.877
s_5606	Kamchatka arc	49.6545	0.892418	13.9979	8.82311	0.180489	12.0827	9.28516	2.85774	1.04283	5348.7	225	[3048]		1270.14	1.23663	0.083
s_1	Kamchatka arc	49.5379	1.01545	13.4198	9.69989	0.159286	9.8359	11.5482	2.42911	1.0254	6086.07	250	[3317]		1308.17	1.35763	0.157
s_TAM-01	Kamchatka arc	51.727	0.83528	15.8603	8.91749	0.191209	8.48363	9.28872	2.7373	0.734644	5006.24	221	[4276]		1266.97	1.0033	0.145
s_90093	Kamchatka arc	51.6959	0.849767	13.6363	8.9392	0.169953	10.4271	9.34744	2.69926	1.04971	5093.07	255	[4276]		1264.8	1.00838	0.217
s_KOM-06	Kamchatka arc	51.4726	0.826349	16.2482	9.2557	0.179208	8.16393	9.63742	2.3994	0.677009	4952.71	267	[4276]		1279.02	1.03469	0.282
s_655	Kamchatka arc	50.5625	0.951929	13.4473	9.10402	0.170345	9.68964	11.6236	2.37481	0.851726	5705.38	270	[4276]		1280.28	1.09289	0.317
s_SHM-01	Kamchatka arc	50.7617	0.892844	16.2217	9.34401	0.180575	8.09579	10.4232	2.34748	0.571821	5351.25	257	[4276]		1286.47	1.10617	0.365
s_201	Kamchatka arc	50.1301	1.17812	14.1475	9.68385	0.169729	9.59471	9.81436	2.60585	1.258	7061.06	271	[4276]		1300.93	1.32811	0.392
s_8837	Kamchatka arc	50.065	0.879737	13.456	8.79737	0.159952	12.2863	9.61712	2.68919	0.889734	5272.69	252	[4276]		1267.95	1.14102	0.442
s_TOL-6/3	Kamchatka arc	50.3299	1.20634	14.4068	9.43343	0.177984	8.99808	10.0759	2.69942	1.27555	7230.16	276	[4276]		1292.03	1.2807	0.527
s_TOL-6/6	Kamchatka arc	50.9879	1.14078	14.3937	9.29019	0.178557	8.78897	10.2075	2.51964	1.14078	6837.26	283	[4276]		1283.71	1.14352	0.554
s_KLU-11	Kamchatka arc	51.9889	0.95873	15.6362	8.74718	0.168025	8.13438	9.67625	2.93549	0.62268	5746.14	262	[4276]		1259.45	0.960821	0.849
s_23/1	Kamchatka arc	49.579	1.1449	15.6901	9.17823	0.15929	9.1293	9.28859	3.06633	1.35396	6861.92	243	[4788]		1283.92	1.37172	0.116
s_BAK14	Kamchatka arc	50.0937	0.985548	16.3362	8.94117	0.179191	8.87989	9.6962	2.98651	0.676942	5906.87	242	[4788]		1274.97	1.20243	0.206
s_BAK32	Kamchatka arc	51.1922	1.01925	16.6877	8.59026	0.169874	8.08402	9.00335	3.15767	0.909328	6108.84	242	[4788]		1256.5	1.07544	0.27
s_BAK30	Kamchatka arc	50.2434	1.07387	16.1976	8.8311	0.169036	8.99866	9.1677	3.14207	0.934668	6436.25	249	[4788]		1267.44	1.2009	0.306
s_BAK61	Kamchatka arc	50.3366	1.05867	16.679	8.93814	0.159799	8.49929	9.05859	3.15602	0.88888	6345.1	255	[4788]		1274.17	1.22552	0.38
s_O-26	Kamchatka arc	50.1767	1.09491	16.2047	8.65625	0.149306	9.3565	9.01807	3.2051	0.895835	6562.33	250	[4788]		1261.41	1.18244	0.443
s_BAK04	Kamchatka arc	48.6869	1.12854	17.2377	9.48917	0.16978	8.07953	10.4565	2.82634	0.699094	6763.88	304	[4788]		1302.31	1.45268	0.526
s_BAK31	Kamchatka arc	50.0561	1.08558	16.0347	8.86943	0.16931	9.11289	9.2822	3.19698	0.946147	6506.41	253	[4788]		1271.39	1.24444	0.568
s_O-40	Kamchatka arc	49.5512	1.19473	16.766	8.87022	0.159297	8.57215	9.5578	3.22576	0.876132	7160.57	285	[4788]		1276.06	1.3118	0.648
s_BAK17	Kamchatka arc	51.2474	1.15039	16.3055	8.33143	0.160054	8.29282	8.90302	3.38115	1.01034	6894.85	236	[4788]		1247.57	1.06667	0.689
s_BAK24	Kamchatka arc	49.4233	1.02468	16.1362	9.07636	0.169121	9.7792	9.62003	2.85517	0.696382	6141.39	261	[4788]		1279.19	1.26552	0.696
s_6024KO	Kamchatka arc	50.9089	0.94001	13.5065	8.87914	0.168212	9.59799	11.5572	2.37476	0.870746	5633.94	295	[7640]		1271.63	1.02724	0.81
s_N69	Kamchatka arc	50.2838	1.04966	15.8949	9.17704	0.169945	9.21703	9.06707	2.89906	0.9297	6291.13	336	[9813]		1280.55	1.22527	1.059
s_K0012	Kamchatka arc	51.2977	0.798563	13.4558	8.51478	0.169695	11.4893	10.1917	2.46556	0.549012	4786.18	242	[10896]		1252.76	0.893554	0.269
s_K1938	Kamchatka arc	51.4092	0.816652	13.8034	8.63865	0.169306	10.8555	10.0687	2.56947	0.587591	4894.59	245	[10896]		1256.99	0.926657	0.412
s_110/00	Kamchatka arc	51.9666	0.859944	15.749	8.40945	0.29998	8.84942	9.10941	3.18979	0.479969	5154.06	151.95	[12740]		1246.87	0.929526	-0.937
s_4482	Kamchatka arc	50.5758	1.22014	17.0719	7.80089	0.170019	9.30106	9.35107	2.6703	0.900103	7312.89	168.58	[12740]		1228.25	0.955539	0.365
s_2082-6	Kamchatka arc	51.0157	0.81009	16.2318	8.88099	0.190021	9.50106	8.44094	2.6803	1.05012	4855.27	257.14	[12740]		1263.09	1.07272	0.645
s_SR 04 28	Kamchatka arc	49.7899	0.739735	16.1563	9.44991	0.182901	8.44395	11.2789	2.21514	0.497899	4433.59	280	[14355]		1295.37	1.19744	0.381
s_C564	Kamchatka arc	47.0782	0.636058	16.1201	10.9098	0.18883	11.0316	10.644	1.79885	0.30809	3812.2	305	[15280]		1357.32	1.73375	0.33
s_K1-18B	Kamchatka arc	51.6262	0.857884	13.7772	8.30309	0.163406	10.5499	8.82395	2.58386	1.97109	5141.72	229	[15433]		1244.19	1.0146	0.439
s_776/21	Kamchatka arc	50.9606	0.83001	14.4802	8.7001	0.170002	11.4901	8.90011	2.58003	0.740009	4974.66	181	[19739]		1256.97	0.989998	-0.818
s_2010/B1	Kamchatka arc	51.4269	0.779952	15.3191	8.1095	0.152991	11.0493	7.95951	3.3098	0.869947	4674.64	182	[19739]		1235.43	0.978613	-0.437
s_K01-46B	Kamchatka arc	49.4257	1.02053	13.407	9.50495	0.180094	10.7056	11.4059	2.33121	0.760396	6116.55	292.4	[19962]		1299.27	1.27341	0.278
s_K01-63	Kamchatka arc	51.6969	1.09048	14.5398	8.78443	0.151456	9.41045	8.46133	3.11999	1.46407	6535.79	249.3	[19962]		1260.61	1.09384	0.418
s_K01-29	Kamchatka arc	50.2056	1.24766	13.2751	9.66184	0.169681	10.6799	9.4722	2.59512	1.28758	7477.81	294.2	[19962]		1296.79	1.29626	0.432
s_K01-58	Kamchatka arc	50.9023	1.2425	14.8298	9.43897	0.170342	8.67744	9.14839	2.82568	1.33268	7446.9	281.8	[19962]		1289.76	1.24431	0.561
s_K01-35	Kamchatka arc	50.4682	1.02732	13.8638	9.05635	0.169557	9.85427	10.6721	2.61318	1.00737	6157.22	267	[19962]		1278.6	1.1552	0.584
s_K01-54	Kamchatka arc	50.4813	1.15185	15.1244	9.43519	0.170274	8.073	10.3166	2.7344	1.15185	6903.63	385	[19962]		1294.07	1.27334	1.176
s_K01-30	Kamchatka arc	50.2113	1.28541	13.4566	9.82134	0.170719	10.3435	9.43973	2.54069	1.27537	7704.09	394	[19962]		1302.72	1.31675	1.261
s_1941C	Kamchatka arc	50.2739	1.19321	14.6168	9.54568	0.178982	8.94908	9.74455	2.78416	1.29264	7151.49	269	[20025]		1295.38	1.31662	0.325
s_1941B	Kamchatka arc	50.3603	1.21457	14.8119	9.57834	0.177742	8.68963	9.67708	2.76488	1.28369	7279.53	271	[20025]		1298.1	1.32072	0.355
s_1975, NV	Kamchatka arc	50.6701	0.949137	13.7427	9.0959	0.177963	9.68911	11.0733	2.47171	0.889816	5688.64	273	[20025]		1278.86	1.10231	0.786
s_OG-167	Kamchatka arc	49.1646	0.961709	15.5751	9.46735	0.171929	10.8944	9.0384	2.60464	0.78557	5763.99	198.796	[20395]		1294.84	1.3411	-0.575
s_OG-704	Kamchatka arc	49.3603	0.971299	15.509	9.46445	0.16702	10.8762	8.89778	2.71407	0.794338	5821.47	249.861	[20395]		1293.54	1.33481	0.019
s_OG-702	Kamchatka arc	49.3144	0.996963	15.5587	9.54668	0.165153	10.8155	8.75817	2.69885	0.839866	5975.29	240.199	[20395]		1296.77	1.35709	0.064
s_OG-703	Kamchatka arc	49.4118	0.990215	15.6495	9.39764	0.16619	10.4759	9.0158	2.73026	0.838863	5934.84	249.861	[20395]		1289.15	1.31126	0.157
s_OG-160	Kamchatka arc	50.29	1.05659	15.6619	9.27005	0.174436	9.50927	8.99593	2.78351	0.939464	6332.64	251.675	[20395]		1281.98	1.2155	0.259
s_OG-701	Kamchatka arc	50.5789	1.0571	16.0012	9.09362	0.164703	8.86404	8.98382	2.93472	1.0022	6335.7	250.883	[20395]		1275.99	1.19034	0.314
s_12KY3-1	Kamchatka arc	51.5765	0.813736	13.3197	8.53258	0.17126	11.2514	10.3313	2.37027	0.55938	4877.12	245.23	[21026]		1250.94	0.849092	0.138
s_12KY2-2	Kamchatka arc	51.5185	0.80055	13.32	8.59029	0.171402	11.5515	10.0633	2.34721	0.554537	4798.09	241.449	[21026]		1252.73	0.858941	0.2
s_13KY1	Kamchatka arc	51.6722	0.947929	14.9072	8.99627	0.169057	9.36055	9.47023	2.73511	0.586669	5681.4	252.276	[21026]		1268.33	0.989068	0.386
s_12KY4-2	Kamchatka arc	51.7644	0.831424	13.8024	8.57563	0.168899	10.6607	10.0505	2.47819	0.581092	4983.13	244.446	[21026]		1250.71	0.857459	0.414
s_12KY4-1	Kamchatka arc	51.8256	0.826566	13.8287	8.53683	0.168728	10.5957	10.0725	2.4797	0.584522	4954.02	241.476	[21026]		1249.01	0.846399	0.532
s_K01-52	Kamchatka arc	50.6719	1.25674	14.6788	9.23958	0.170917	8.55591	9.8026	2.86538	1.34723	7532.28	280	[21486]		1285.14	1.2483	0.846
s_TOL-1	Kamchatka arc	50.2781	1.22654	14.7283	9.64413	0.178046	8.68466	9.6748	2.79927	1.33534	7351.23	262.7	[21668]		1298.62	1.33913	0.249
s_TOL-2	Kamchatka arc	50.3353	1.21397	14.7552	9.60319	0.174693	8.64583	9.7009	2.80299	1.32254	7275.91	270.9	[21668]		1297.52	1.32782	0.266
s_TOL-4	Kamchatka arc	50.3362	1.19469	14.615	9.51769	0.176217	8.96016	9.72676	2.74778	1.3042	7160.35	269.4	[21668]		1295.16	1.30726	0.373
s_K2-83 A	Kamchatka arc	50.2101	0.910364	14.1257	9.46068	0.170068	9.87395	10.034	2.90116	1.04042	5456.26	284	[22526]		1294.13	1.30419	0.322
s_7424-1	Kamchatka arc	51.7874	0.875853	13.9831	8.70567	0.162949	9.33904	10.1538	3.00438	0.814747	5249.42	263	[22526]		1260.79	0.996742	0.493
s_SHIV-10-24	Kamchatka arc	51.8333	0.797977	12.8703	8.09046	0.161004	11.9646	8.45272	2.69682	1.88174	4782.67	218	[22526]		1232.42	0.948257	0.54
s_K2-85	Kamchatka arc	49.995	0.886013	13.778	9.20851	0.169238	11.0105	9.89547	2.78746	1.02539	5310.31	263	[22526]		1282.93	1.24795	0.635
s_7401	Kamchatka arc	50.2209	0.984133	14.8423	9.01788	0.160675	9.1183	9.91163	3.24362	1.2151	5898.39	285	[22526]		1277.95	1.29072	0.657
s_K2-94	Kamchatka arc	51.7375	1.02559	14.4479	9.00427	0.169272	8.14498	9.92731	3.14647	1.14508	6146.86	291	[22526]		1272.28	1.11166	1.066
s_S-608	Kamchatka arc	47.891	0.779691	16.8033	11.1168	0.189925	9.62618	9.5762	2.22912	0.419833	4673.07	258	[22560]		1360.31	1.74656	-0.633
s_KL-03	Kamchatka arc	51.3143	0.8219	13.2098	8.76363	0.158439	11.7443	10.1698	2.14882	0.57434	4926.05	236	[22592]		1257.84	0.869359	0.085
s_KL-05	Kamchatka arc	51.5921	0.802104	13.1902	8.75383	0.15844	11.5562	10.0709	2.14885	0.633761	4807.4	243	[22592]		1256.95	0.852229	0.377
s_KH98-L4	Kamchatka arc	49.5286	0.878972	13.7969	9.53043	0.17777	11.4069	9.79709	2.59741	1.01724	5268.11	239	[23355]		1298.4	1.34517	-0.15
s_KHAR03-01	Kamchatka arc	51.0341	0.886865	15.1358	8.77011	0.177373	9.02631	9.86391	2.93651	0.985405	5315.41	255	[23355]		1265.68	1.10191	0.177
s_KH98-L3	Kamchatka arc	50.445	0.897809	14.0394	9.28394	0.167723	10.3889	9.54045	2.89075	1.08526	5381.01	265	[23355]		1284.84	1.24082	0.272
s_KH98-L6	Kamchatka arc	50.2031	1.03522	13.724	9.36626	0.177466	10.1156	10.0071	2.87889	1.20282	6204.57	278	[23355]		1290.56	1.30072	0.294
s_KH98-9	Kamchatka arc	50.0958	0.856759	13.9346	8.7153	0.157565	11.7681	9.52282	2.80662	0.98478	5134.97	244	[23355]		1265.42	1.15855	0.342
s_1006	Kamchatka arc	50.8938	0.852525	13.6701	9.3183	0.188349	10.0816	9.96265	2.42871	1.33827	5109.6	272	[23355]		1285	1.16845	0.407
s_KH98-L2	Kamchatka arc	50.3951	0.897622	14.1154	9.29187	0.167688	10.2388	9.72588	2.84083	1.06531	5379.89	273	[23355]		1286.52	1.24516	0.545
s_KH98-7	Kamchatka arc	50.9352	0.959362	14.7267	8.78261	0.168136	9.45516	9.62329	3.05611	1.09783	5749.93	264	[23355]		1266.53	1.14006	0.648
s_KH98-6	Kamchatka arc	49.8034	0.857659	13.7521	8.84276	0.15773	12.1157	9.55255	2.77014	0.966099	5140.37	280	[23355]		1270.33	1.19851	0.665
s_KH98-10	Kamchatka arc	51.1419	0.869155	14.7756	8.6718	0.158028	8.62242	10.1039	2.86426	1.58028	5209.27	294	[23355]		1262.29	1.13191	1.158
s_V40-8/2	Kurile arc	47.0038	0.867854	15.6513	9.50292	0.159605	11.2921	11.0926	2.17462	0.977583	5201.47	324	[3048]		1310.98	1.60669	0.663
s_MA8	Kurile arc	49.7316	1.0007	16.7592	8.72325	0.151621	9.44092	9.94632	2.58766	0.525619	5997.67	227	[3890]		1264.36	1.11675	0.232
s_MT-9	Kurile arc	49.0225	0.999449	17.2281	9.29191	0.158329	8.45079	9.64815	2.71138	1.16767	5990.19	228.6	[6973]		1293.47	1.41487	-0.39
s_CSR-7	Kurile arc	50.96	0.961509	16.9305	7.9498	0.148687	8.37603	9.69439	2.84488	1.04081	5762.79	224	[6973]		1236.14	0.987589	0.047
s_P-11	Kurile arc	49.7695	0.950254	16.2236	9.20558	0.168274	8.52259	10.1162	2.52411	1.26701	5695.34	253.3	[6973]		1287.67	1.3016	0.225
s_MT-7	Kurile arc	50.3691	0.980252	14.7038	8.84207	0.148523	10.7135	9.35695	2.65361	1.01986	5875.13	218	[6973]		1267.25	1.12943	0.298
s_SHM-19	Kurile arc	51.2122	0.979712	14.5076	9.51013	0.128649	8.68875	10.3513	2.60267	0.821374	5871.89	251.1	[6973]		1289.81	1.1308	0.367
s_SHM-21	Kurile arc	50.6473	0.970179	14.3448	9.1771	0.138597	9.78099	10.3849	2.57394	0.821682	5814.76	259.3	[6973]		1279.56	1.1238	0.582
s_MH-02	Kurile arc	49.8478	1.02954	16.5126	9.37582	0.169924	8.34628	9.36583	3.29853	0.769657	6170.55	207.6	[10871]		1292.74	1.36194	-0.256
s_CK-15	Kurile arc	50.1137	1.30504	16.4938	9.40636	0.130504	8.6133	8.93454	2.80083	0.833221	7821.77	210	[10871]		1290	1.26231	0.095
s_NR-05	Kurile arc	49.8977	1.07892	17.2529	8.76996	0.178171	8.35423	9.90828	2.76165	0.603801	6466.52	234.4	[10871]		1268.01	1.15377	0.294
s_SP-06	Kurile arc	50.5639	1.02886	17.1809	8.53053	0.169812	8.28081	9.10989	2.90677	1.01887	6166.45	222.6	[10871]		1258.28	1.1201	0.333
s_D-7	Kurile arc	51.1062	1.00405	15.0809	8.08262	0.150608	10.0907	9.46821	2.76114	1.12454	6017.78	211.8	[10871]		1235.89	0.959286	0.457
s_TAKA-1	Kurile arc	47.7882	1.2667	15.8832	9.42107	0.178129	10.5096	10.569	2.23651	0.831271	7591.94	326.1	[13580]		1300.28	1.45459	0.732
s_NR-07	Kurile arc	49.602	1.08425	16.8515	8.96788	0.172264	8.65375	10.1332	2.67516	0.648525	6498.45	229.6	[16007]		1276.51	1.21016	0.127
s_SHM-21	Kurile arc	50.9092	0.980579	14.3953	9.17903	0.141527	9.36099	10.3214	2.74967	0.788507	5877.09	260	[16007]		1278.66	1.11672	0.619
s_080731-06C	Kurile arc	50.0212	0.990128	16.446	8.80322	0.159411	9.40126	10.1686	2.38621	0.495064	5934.32	229.34	[19410]		1266.71	1.07081	-0.094
s_P-76/10	Kurile arc	51.0614	0.680418	17.2206	11.9373	0.370228	13.5583	1.31081	2.37146	0.110068	4078.08	303	[20375]		1359.02	1.24354	0.002
s_60-454A-16-1,52-55	Mariana arc	50.5206	1.11709	15.6493	8.63479	0.140894	9.52041	10.4362	2.38513	0.503193	6695.26	177	[2394]		1258.4	0.984823	-0.308
s_1404.4	Mariana arc	50.1307	0.904997	16.4526	8.58501	0.132191	8.17547	11.0938	2.7455	0.589773	5424.09	285	[2402]		1265.55	1.10804	1.041
s_6708	Mariana arc	50.0279	0.937767	15.3712	8.28701		10.9372	10.611	2.31384	0.458691	5620.5	218	[2431]		1249.65	0.96416	0.256
s_41-3	Mariana arc	51.0404	1.17139	15.9989	8.56879	0.180213	8.09958	10.9429	2.72322	0.210249	7020.69	272	[2452]		1258.98	0.959521	0.73
s_6-1	Mariana arc	49.7418	1.10268	16.1658	8.24743	0.151744	8.83152	11.3505	2.83256	0.526047	6608.87	228	[2517]		1254.38	1.09228	0.075
s_41-3	Mariana arc	49.024	1.21811	16.2149	9.06939	0.159752	8.27717	11.6519	2.70581	0.509211	7300.74	254	[2517]		1288.49	1.29819	0.199
s_34-9	Mariana arc	50.8967	1.0057	15.9357	8.05127	0.145153	8.36701	11.2701	2.789	0.549506	6027.65	229	[2517]		1243.24	0.947163	0.501
s_195-1201D-48R-2,74-76CM, PIECE 1D	Mariana arc	49.0966	0.906097	15.7188	8.79505	0.196978	8.39124	13.493	2.09781	0.256071	5430.68	249.6	[8875]		1278.14	1.09781	-0.316
s_195-1201D-48R-3,77-79CM, PIECE 7C	Mariana arc	49.0748	0.902797	15.5732	8.86115	0.206073	8.54713	13.5518	2.07054	0.176634	5410.9	246.5	[8875]		1281.79	1.10276	0.191
s_195-1201D-48R-2,135-138CM, PIECE 5C	Mariana arc	48.8629	0.91092	15.545	9.48545	0.217829	8.29729	13.1291	2.05947	0.346546	5459.59	259.4	[8875]		1305.17	1.2713	0.285
s_195-1201D-52R-1,78-80CM, PIECE 7A	Mariana arc	49.1879	0.922151	15.9807	8.85854	0.206012	8.15221	12.9984	2.13861	0.470886	5526.9	270	[8875]		1281.16	1.15008	0.286
s_195-1201D-5R-4,136-138CM	Mariana arc	50.4256	0.430646	17.3961	8.27257	0.16024	8.11217	11.5273	2.3335	0.22033	2581.07	219	[8875]		1251.99	0.93205	0.519
s_195-1201D-48R-4,70-72CM, PIECE 13	Mariana arc	49.141	0.880455	15.4515	8.91098	0.203182	8.61105	13.439	2.07052	0.222533	5277	261.2	[8875]		1282.8	1.10729	0.522
s_195-1201D-49R-2,131-133CM, PIECE 14	Mariana arc	49.5667	0.902145	15.8388	8.15006	0.194781	8.64214	13.5219	1.87605	0.297298	5407	243.9	[8875]		1251.74	0.905806	0.543
s_195-1201D-47R-3,83-86CM, PIECE 7	Mariana arc	49.8425	0.972536	16.4926	8.46917	0.202612	8.18552	12.1871	2.0869	0.486268	5828.89	303.6	[8875]		1262.26	1.01362	0.931
s_195-1201D-48R-1,48-50CM, PIECE 2C	Mariana arc	49.9591	0.930977	15.8064	8.18653	0.172028	8.2776	13.3069	2.11494	0.242864	5579.8	277.4	[8875]		1251.55	0.903887	1.064
s_D48-4-1	Mariana arc	50.8865	0.777587	16.5919	8.38178	0.161577	8.36159	10.8155	2.23178	0.696799	4660.46	262	[9036]		1250.14	0.929953	0.308
s_D48-1-3	Mariana arc	50.8231	0.78608	16.5077	8.38486	0.161247	8.67712	10.8842	2.09621	0.584521	4711.36	247	[9036]		1252.22	0.913695	0.436
s_D48-3-3	Mariana arc	50.9042	0.779248	16.6273	8.38957	0.161922	8.25801	10.8386	2.2669	0.678047	4670.42	268	[9036]		1252.6	0.943126	0.545
s_D48-2-1	Mariana arc	51.0308	0.783082	16.7158	8.26251	0.160632	8.19224	10.8427	2.20869	0.722845	4693.39	243	[9036]		1245.74	0.901743	0.555
s_D48-3-2	Mariana arc	50.6848	0.779766	16.3751	8.34451	0.162029	8.73945	10.8458	2.2279	0.749385	4673.52	248	[9036]		1250.15	0.949338	0.555
s_NT06-08 D24 5	Mariana arc	48.9878	0.783131	16.5613	8.72407	0.166439	8.91861	10.214	2.18641	2.1006	4693.68	206.105	[14407]		1272.75	1.35055	-0.453
s_NT06-08 D24 8	Mariana arc	48.8422	0.759831	16.2344	8.69418	0.161651	8.93529	10.8115	2.08337	2.08195	4554.04	211.405	[14407]		1274.89	1.35402	-0.353
s_IB339BMS01CA01	Mariana arc	50.594	0.829761	16.8066	8.13392	0.148241	8.57569	10.8952	2.22707	0.728087	4973.17	217.926	[14407]		1241.98	0.921838	-0.039
s_NT06-08 D24 6	Mariana arc	47.9302	0.770879	15.161	8.67188	0.15042	10.8889	11.165	1.81534	2.055	4620.25	240.593	[14407]		1277.48	1.40894	-0.001
s_NT06-08 D18 9	Mariana arc	47.5863	0.745887	13.6244	8.84051	0.202641	11.7636	12.3954	1.7645	1.73837	4470.47	250.803	[14407]		1289.03	1.43458	0.037
s_NT06-08 D23 1	Mariana arc	48.7844	0.773558	16.3653	9.0215	0.160739	8.80048	11.513	2.14989	1.09504	4636.31	273	[14407]		1286.14	1.3011	0.23
s_NT06-08 D14 6	Mariana arc	48.5568	0.818073	16.6666	9.53329	0.172062	8.70929	11.1472	2.15294	0.955139	4903.11	307.097	[14407]		1303.02	1.40045	0.293
s_NT06-08 D23 3	Mariana arc	48.9276	0.767973	16.7487	9.23044	0.167844	8.54011	11.1648	2.15683	1.02653	4602.84	284.435	[14407]		1292.67	1.32278	0.334
s_NT06-08 D16 13	Mariana arc	48.1829	0.84945	17.2642	8.82402	0.151341	9.01893	11.4852	2.11706	0.881801	5091.17	273.001	[14407]		1278.97	1.29697	0.345
s_NT06-08 D16 9	Mariana arc	47.747	0.826938	17.337	8.90362	0.268016	9.39448	11.5609	2.01779	0.705232	4956.24	268.183	[14407]		1284.79	1.33499	0.349
s_NT06-08 D14 3	Mariana arc	48.707	0.810687	16.5327	9.44354	0.169904	8.74705	11.1442	2.21214	0.952839	4858.84	300.685	[14407]		1298.64	1.36968	0.364
s_NT06-08 D16 7	Mariana arc	47.5399	0.868278	17.5419	9.40977	0.177396	8.1795	11.8225	2.18525	0.914377	5204.02	303.598	[14407]		1307.21	1.51919	0.474
s_NT06-08 D23 5	Mariana arc	48.6962	0.782037	16.8773	9.28181	0.1701	8.58146	11.3068	2.13231	0.890292	4687.13	282.778	[14407]		1294.72	1.33316	0.598
s_NT06-08 D14 5	Mariana arc	48.1419	0.82175	16.8528	9.64401	0.170277	8.7862	11.3199	2.13364	0.822855	4925.15	285.79	[14407]		1311.73	1.46976	0.645
s_NT06-08 D16 2	Mariana arc	48.4567	0.817988	17.2757	8.49806	0.146023	8.84008	11.6361	2.15923	0.978175	4902.6	276.142	[14407]		1269.25	1.24207	0.659
s_NT06-08 D6 1	Mariana arc	47.1602	0.832027	16.7283	9.38927	0.156781	8.97125	12.0525	1.83873	1.35215	4986.74	327.092	[14407]		1309.1	1.56344	0.786
s_NT06-08 D16 4	Mariana arc	49.1698	0.881375	16.7009	8.93945	0.193269	8.27799	11.1797	2.23345	1.15519	5282.51	287.362	[14407]		1281.37	1.26882	0.804
s_NT06-08 D16 5	Mariana arc	47.6012	0.861301	17.0379	9.23607	0.164652	9.06462	11.6528	2.17692	0.913023	5162.2	290.897	[14407]		1298.51	1.46435	0.805
s_DS065B02 310-320	Mariana arc	49.7151	0.873457	16.7395	9.3614	0.164415	8.67291	10.1013	2.53816	0.626834	5235.05	234	[15489]		1290.01	1.24601	0.025
s_1091-18	Mariana arc	49.5054	0.663505	15.1814	8.79392	0.138643	9.66539	12.8047	2.14896	0.0693214	3976.71	252	[15967]		1275	1.03102	-0.043
s_HPD1147R18	Mariana arc	48.9757	0.55232	14.6716	9.26185	0.180759	10.3535	12.7435	1.69713	0.431814	3310.32	242	[18072]		1293.06	1.14367	-0.157
s_HPD1147R22	Mariana arc	48.7215	0.832247	14.9704	10.2855	0.180487	9.38534	11.4509	2.08563	0.772085	4988.06	313.3	[18072]		1332.58	1.50667	-0.055
s_HPD1147R19	Mariana arc	48.9419	0.549012	14.6037	9.2962	0.179677	10.4312	12.7171	1.72689	0.419245	3290.5	263	[18072]		1295.12	1.15999	0.139
s_HPD1147R16	Mariana arc	49.0009	0.552264	14.6802	9.26995	0.180741	10.2922	12.7724	1.68692	0.43177	3309.99	255.2	[18072]		1291.55	1.13057	0.563
s_HPD1147R14	Mariana arc	48.7673	0.420926	14.3917	8.79239	0.170375	10.2626	14.552	1.37302	0.220485	2522.82	234.6	[18072]		1280.03	0.975554	0.618
s_HPD1147R21	Mariana arc	48.9593	0.547754	14.6201	9.29283	0.179265	10.4073	12.7179	1.71298	0.428244	3282.96	268.6	[18072]		1294.43	1.15391	0.741
s_HPD1147R17	Mariana arc	48.9319	0.556384	14.6647	9.29749	0.178838	10.3726	12.7074	1.71883	0.437158	3334.68	280.8	[18072]		1293.78	1.1551	1.1
s_HPD1147R23	Mariana arc	49.5308	0.668796	16.5402	7.93994	0.139748	8.13536	13.2661	2.03633	0.708724	4008.42	275.4	[18072]		1245.76	0.964387	1.158
s_HPD1147R01	Mariana arc	49.1802	0.402374	13.1073	8.70745	0.171009	10.8742	15.0086	1.27754	0.241424	2411.62	228.8	[18072]		1274.08	0.861593	1.269
s_HPD1147R06	Mariana arc	49.0853	0.397693	13.0443	8.73141	0.16902	11.0857	14.9334	1.27262	0.238616	2383.57	229.3	[18072]		1274.57	0.869359	1.929
s_HPD1147R13	Mariana arc	48.6457	0.408285	14.2103	8.80804	0.169289	10.5855	14.529	1.34435	0.248954	2447.05	235.4	[18072]		1278.62	0.972487	2.141
s_D12-116	Mariana arc	49.5493	1.25466	16.8384	7.82671	0.149365	8.96189	10.8937	3.28603	0.209111	7519.82	192	[20498]		1238.63	1.06663	0.294
s_D08-303	Mariana arc	51.0846	1.19342	15.8887	7.85839	0.141593	9.05181	10.8116	2.6498	0.32364	7152.77	208	[20498]		1232.04	0.843858	0.41
s_D08-022	Mariana arc	50.881	1.17557	15.8551	7.7266	0.150714	9.20359	10.6906	2.96404	0.331571	7045.76	201	[20498]		1227.51	0.879613	0.624
s_D08-006	Mariana arc	50.8424	1.18706	15.975	7.72595	0.150897	8.99349	10.7741	2.97771	0.352094	7114.63	217	[20498]		1227.96	0.888947	0.718
s_34DS2	Mariana arc	50.241	0.982366	18.0034	6.61971	0.160386	8.23985	12.049	2.50604	0.340821	5887.8	161	[23441]		1193.66	0.747339	0.295
s_53DS	Mariana arc	50.1076	0.929956	16.7392	7.03137	0.129994	9.86953	11.5695	2.36989	0.369982	5573.68	204	[23441]		1205.85	0.781651	0.582
s_34DS1	Mariana arc	50.1882	0.912695	18.0934	6.60126	0.130385	8.24435	12.1559	2.49737	0.330977	5470.23	193	[23441]		1194.05	0.749496	0.585
s_CB6-24-26	Ryukyu arc	49.7477	0.972301	16.2785	9.03137	0.16038	8.22948	11.8079	2.20522	0.400949	5827.48	268.7	[2669]		1282.16	1.12075	0.645
s_KB	Ryukyu arc	50.807	0.83863	14.097	8.90546	0.149755	11.042	10.2433	2.10656	0.708842	5026.32	255	[5296]		1267.72	0.977612	0.059
s_TRD01	Ryukyu arc	49.5958	1.09769	15.4276	8.32367	0.169644	10.3582	9.94911	2.77417	1.09769	6579.02	208	[11716]		1254.68	1.16822	0.115
s_351-U1438E 86R1 25-28	Ryukyu arc	49.8165	0.690166	15.4765	9.08271	0.193207	8.10273	12.9468	2.01373	0.613481	4136.5	248	[21545]		1286.39	1.12085	-0.148
s_351-U1438E 84R1 96-99	Ryukyu arc	50.313	0.692257	15.343	8.47764	0.223729	8.38935	12.6813	1.96842	0.914983	4149.03	238	[21545]		1261.88	0.995454	0.229
s_JPG-10	Sunda arc	48.6758	0.794868	15.3211	9.0615	0.158974	10.9891	11.2772	2.28525	0.317947	4764.04	285	[2479]		1283.7	1.21711	0.423
s_VB82	Sunda arc	48.8302	0.804894	15.9488	8.8737	0.168928	10.5232	11.0896	2.32525	0.347794	4824.12	264	[4583]		1276.21	1.18403	0.259
s_64LG	Sunda arc	48.5702	0.693719	14.9546	8.50301	0.158564	12.4077	11.486	1.92259	0.287398	4157.8	264	[4583]		1263.24	1.06335	0.597
s_BAR 24	Sunda arc	49.5792	0.736719	15.6304	8.36275	0.169246	11.3494	10.6526	2.2898	0.238936	4415.52	262	[13319]		1251.59	0.9859	0.476
s_MO-C5	Sunda arc	47.8607	0.847687	16.3992	8.77396	0.17033	9.9425	11.3784	2.77281	0.713008	5080.6	259	[22262]		1280.71	1.4073	0.012
s_MO-D3	Sunda arc	48.0364	0.989044	16.2762	8.9499	0.176226	8.7915	11.6923	2.881	0.940532	5927.82	255	[22262]		1288.41	1.46515	0.131
s_MO-D1	Sunda arc	47.5802	0.870405	16.0515	8.84268	0.171308	11.2687	10.9915	2.36663	0.71296	5216.77	262	[22262]		1282.07	1.38731	0.533
s_MO-C4	Sunda arc	46.8972	0.970219	16.4937	8.90028	0.164343	9.39529	13.1376	2.18794	0.623712	5815	299	[22262]		1294.45	1.45513	0.794
s_505	Vanuatu arc	48.9362	0.693429	13.1652	10.0524	0.198122	10.342	12.1053	2.13972	1.05005	4156.06	350	[3090]		1323.95	1.4596	1.352
s_576	Vanuatu arc	48.4968	0.733449	13.3706	9.90222	0.208141	10.9819	11.537	2.31928	1.16955	4395.92	380	[3090]		1322.04	1.54698	1.692
s_684	Vanuatu arc	48.4932	0.584494	12.9579	9.78053	0.20804	12.5617	11.4323	1.87236	0.83216	3503.16	330	[3090]		1314.09	1.38042	2.546
s_D19M1	Vanuatu arc	51.221	1.02442	15.2639	7.4168	0.245861	9.85492	10.7154	2.34592	0.82978	6139.85	231	[3869]		1215.67	0.781824	1.178
s_D21M1	Vanuatu arc	51.2949	0.646872	14.3221	8.7833	0.161718	8.82373	11.8256	1.94062	0.919771	3877.02	361	[3869]		1265.57	0.919281	2.871
s_10/1	Vanuatu arc	49.2898	1.3931	15.4444	9.34919	0.190424	8.69939	11.6059	2.51561	0.30067	8349.56	269	[3930]		1295.79	1.25368	0.441
s_AOW1	Vanuatu arc	48.5306	1.07957	13.5646	9.92083	0.189924	9.87605	12.0652	2.2591	1.12955	6470.38	297	[4032]		1320.36	1.50778	0.009
s_TOW5	Vanuatu arc	48.4803	0.629874	13.6573	10.7595	0.179964	9.30814	13.3573	1.83963	0.459908	3775.14	316	[4032]		1355.02	1.5582	0.512
s_AOW130	Vanuatu arc	48.9402	0.709858	13.3473	9.96779	0.179964	10.5879	11.3077	2.38952	1.24975	4254.53	296	[4032]		1319.5	1.50599	0.792
s_AOW11	Vanuatu arc	49.3601	0.769846	14.3671	9.80586	0.189962	8.65827	11.5277	2.55949	1.39972	4614.06	344	[4032]		1316.05	1.49387	1.253
s_68578	Vanuatu arc	47.783	1.07096	13.8525	10.8974	0.210189	9.65869	12.3511	2.01181	0.750676	6418.81	367	[4033]		1361.18	1.7497	0.445
s_68564	Vanuatu arc	48.0148	0.640064	12.1912	9.96178	0.190019	13.4913	11.2011	1.78018	1.19012	3836.22	324	[4033]		1325.55	1.52903	1.268
s_68562	Vanuatu arc	48.8867	0.718922	13.8792	9.99977	0.1997	9.9351	11.4828	2.21667	1.30804	4308.85	355	[4033]		1323.08	1.51654	1.292
s_68635	Vanuatu arc	48.7105	0.697003	13.7011	10.0257	0.199144	10.7239	11.162	2.13084	1.27452	4177.48	353	[4033]		1322.45	1.51355	1.459
s_68615	Vanuatu arc	48.9712	0.749101	14.4626	10.0297	0.179784	8.60967	12.1254	2.3372	1.1686	4489.73	376	[4033]		1326.52	1.52635	1.566
s_K4B	Vanuatu arc	50.6288	1.15018	16.458	7.1102	0.156843	9.42102	11.575	2.54085	0.0836494	6893.59	180	[4533]		1208.31	0.741103	0.756
s_16	Vanuatu arc	48.7014	0.740021	13.1304	10.7503	0.210006	10.3603	11.2403	2.10006	1.31004	4435.31	330	[4841]		1352.07	1.68958	0.353
s_14	Vanuatu arc	48.6666	0.679953	12.7991	10.1193	0.189987	12.1692	10.5293	2.13985	1.31991	4075.29	302	[4841]		1327.37	1.55417	0.482
s_13	Vanuatu arc	49.1082	0.769972	14.2595	10.1796	0.199993	9.11967	11.2696	2.42991	1.27995	4614.82	352	[4841]		1326.62	1.5441	0.778
s_EFA29M6	Vanuatu arc	51.5748	0.749191	14.821	7.90316	0.195441	11.1836	7.92623	2.51902	2.03042	4490.27	240	[4890]		1227.87	0.965801	0.254
s_EFA27M12	Vanuatu arc	49.4923	0.904699	16.0717	8.69972	0.159653	10.0581	10.1646	2.62895	0.745046	5422.3	237	[4890]		1266.62	1.17784	0.257
s_VOT12M1	Vanuatu arc	50.467	0.766461	16.1753	8.32229	0.149311	9.55588	10.5712	2.30934	0.656966	4593.77	208	[4890]		1250.02	0.967347	0.263
s_FUT19M1	Vanuatu arc	51.2054	1.02411	15.2592	7.42351	0.245786	9.85192	10.7122	2.34521	0.85001	6137.98	231	[4890]		1215.71	0.785169	1.06
s_FUT21M1	Vanuatu arc	51.2663	0.646511	14.3142	8.78316	0.161628	8.81881	11.819	1.93953	0.969766	3874.86	361	[4890]		1265.65	0.927817	2.873
s_EG.74	Vanuatu arc	47.9627	0.771359	15.0811	9.94855	0.178006	9.74088	11.6099	2.79865	0.662577	4623.13	280	[7576]		1324.92	1.63009	-0.058
s_27	Vanuatu arc	50.4687	0.702328	14.4917	9.70399	0.187947	9.62486	10.1986	2.2059	1.11779	4209.39	275	[7576]		1299.24	1.22335	0.11
s_68	Vanuatu arc	48.7643	0.663527	13.835	8.7645	0.168358	11.5672	13.0329	1.72319	0.376329	3976.84	245	[7576]		1275.21	1.04588	0.485
s_EG.66	Vanuatu arc	48.609	0.682822	13.3892	9.3418	0.168232	12.6569	11.2814	1.93961	0.742198	4092.49	289	[7576]		1295.49	1.27107	0.604
s_PV47	Vanuatu arc	49.3594	0.646587	15.7568	9.36059	0.179055	8.336	12.5736	1.9696	0.636639	3875.31	348	[12378]		1297.56	1.21763	2.076
s_TUK-3	Vanuatu arc	47.0873	0.781116	14.2804	10.6753	0.190272	10.2046	13.5293	1.5422	0.430615	4681.61	367.71	[19944]		1360.09	1.68859	1.037
s_GAUA 12A	Vanuatu arc	49.2451	0.767089	12.9295	10.1135	0.191772	8.34714	12.7478	2.58388	1.67548	4597.54	332	[20672]		1332.75	1.62439	0.308
s_SM8E	Vanuatu arc	48.2787	0.72998	12.1397	11.1597	0.199994	10.5897	12.4797	1.88995	1.04997	4375.13	340	[20673]		1371.99	1.77763	0.454
Data from the GEOROC database
Reference
[4867]	Bindeman I. N., Fournelle J. H., & Valley J. W. Low-18O Tephra From A Compositionally Zoned Magma Body: Fisher Caldera, Unimal Island, Aleutians. J. Volcanol. Geotherm. Res. 111, 35-53 (2001).
[6565]	George R. M. M., Turner Simon P., Hawkesworth C. J., Morris J. D., Nye C. J., Ryan J. G., & Zheng S.-H. Melting Processes And Fluid And Sediment Transport Rates Along The Alaska-Aleutian Arc From An Integrated U-Th-Ra-Be Isotope Study. J. Geophys. Res. 108 (2003).
[16078]	Jicha B. R., Coombs M. L., Calvert A. T., & Singer B. S. Geology And 40Ar/39Ar Geochronology Of The Medium- To High-K Tanaga Volcanic Cluster, Western Aleutians. Bull. Geol. Soc. Am. 124, 842-856 (2012).
[19452]	Yogodzinski G. M., Brown S. T., Kelemen P. B., Vervoort J. D., Portnyagin M. V., Sims K. W. W., Hoernle K. A., Jicha B. R., & Werner R. The Role Of Subducted Basalt In The Source Of Island Arc Magmas: Evidence From Seafloor Lavas Of The Western Aleutians. J. Petrol. 56, 441-492 (2015).
[22260]	Jicha B. R., & Kay S. M. Quantifying Arc Migration And The Role Of Forearc Subduction Erosion In The Central Aleutians. J. Volcanol. Geotherm. Res. 360,84-99 (2018).
[3187]	Nakada S., & Kamata H. Temporal Change In Chemistry Of Magma Source Under Central Kyushu, Southwest Japan: Progressive Contamination Of Mantle Wedge. Bull. Volcanol. 53, 182-194 (1991).
[3511]	Kimura J.-I., & Yoshida T. Mantle Diapir-Induced Arc Volcanism: The Ueno Basalts, Nomugi-Toge And Hida Volcanic Suites, Central Japan. The Island Arc 8, 304-322 (1999).
[3574]	Kaneko T. Geochemistry Of Quaternary Basaltic Lavas In The Norikura Area, Central Japan: Influence Of The Subcontinental Upper Mantle On The Trace Elements And Sr Isotope Composition. J. Volcanol. Geotherm. Res. 64, 61-83 (1995).
[4140]	Nagao Takashi, Fujibayashi N., Kagami H., Tazaki K., & Takata S. Origin Of The Sr-Rich Cenozoic Alkali Basalts In Yokota Area, Chugoku Mountains, Southwest Japan. J. Geol. Soc. Japan 96, 795-803 (1990).
[6615]	Kakubuchi S., Nagao Takashi, & Kagami H. Genetic Relationship Between Tholeiite And Alkali Basalts Of The Kitamatsuura Basalts, Northwestern Kyushu, Japan. J. Jpn. Assoc. Mineral. Petrol. Econ. Geol. 89, 41-55 (1994).
[6823]	Kakubuchi S., & Matsumoto Y. Primitive Tholeiitic Basalt From The Yabakei District, Oita Prefecture, Southwest Japan J. Jpn. Assoc. Mineral. Petrol. Econ. Geol. 85, 559-568 (1990).
[7275]	Mikami K. Geological And Petrographical Studies On The Tanzawa Mountainland Part Ii. Sci. Rept. Yokohama Nation. Univ., Sect. Ii. 9, 59-108 (1962).
[8432]	Onoue T., Nagai K., Kamishima A., Seno M., & Sano Hiroki. Origin Of Basalts From Sambosan Accretionary Complex, Shikoku And Kyushu. J. Geol. Soc. Japan 110, 222-236 (2004).
[8706]	Shuto K., Ishimoto H., Hirahara Y., Sato M., Matsui Koji, Fujibayashi N., Takazawa E., Yabuki Kaori, Sekine M., Kato Masayasu, & Rezanov A. I. Geochemical Secular Variation Of Magma Source During Early To Middle Miocene Time In The Niigata Area, Ne Japan: Asthenospheric Mantle Upwelling During Back-Arc Basin Opening. Lithos 86, 1-33 (2006).
[9710]	Ishiwatari A., & Imasaka M. Picritic Basalt From The Miocene Yoka Formation In The Tango Peninsula, Kyoto Prefecture, Southwestern Japan. J. Geol. Soc. Japan 108, 671-684 (2002).
[10193]	Takimoto T., & Shuto K. Petrology Of Middle Miocene Volcanic Rocks From The Tomari Area In The Shimokita Peninsula, Northeast Japan Arc. Sci. Rept. Of Niigata Univ., Series E: Geol. And Min. 9, 25-88 (1994).
[11716]	Miyoshi M., Fukuoka T., Sano T., & Hasenaka T. Subduction Influence Of Philippine Sea Plate On The Mantle Beneath Northern Kyushu, Sw Japan: An Examination Of Boron Contents In Basaltic Rocks. J. Volcanol. Geotherm. Res. 171, 73-87 (2008).
[13305]	Sakuyama T., Ozawa K., Sumino H., & Nagao K. Progressive Melt Extraction From Upwelling Mantle Constrained By The Kita-Matsuura Basalts In Nw Kyushu, Sw Japan. J. Petrol. 50, 725-779 (2009).
[13465]	Ohba T., Matsuoka K., Kimura Y., Ishikawa H., & Fujimaki H. Deep Crystallization Differentiation Of Arc Tholeiite Basalt Magmas From Northern Honshu Arc, Japan. J. Petrol. 50, 1025-1046 (2009).
[13668]	Yamamoto T., & Hoang N. Synchronous Japan Sea Opening Miocene Fore-Arc Volcanism In The Abukuma Mountains, Ne Japan: An Advancing Hot Asthenosphere Flow Versus Pacific Slab Melting. Lithos 112, 575-590 (2009).
[13757]	Mashima H. Genesis Of High-Magnesium Andesites And Associated Basalts From Saga-Futagoyama, Northwest Kyushu, Southwest Japan. J. Volcanol. Geotherm. Res. 187, 106-116 (2009).
[16193]	Takanashi K., Shuto K., & Sato M. Origin Of Late Paleogene To Neogene Basalts And Associated Coeval Felsic Volcanic Rocks In Southwest Hokkaido, Northern Ne Japan Arc: Constraints From Sr And Nd Isotopes And Major- And Trace-Element Chemistry. Lithos 125, 368-392 (2011).
[17004]	Sato M., Shuto K., Uematsu M., Takahashi T., Ayabe M., Takanashi K., Ishimoto H., & Kawabata H. Origin Of Late Oligocene To Middle Miocene Adakitic Andesites, High Magnesian Andesites And Basalts From The Back-Arc Margin Of The Sw And Ne Japan Arcs. J. Petrol. 54, 481-524 (2013).
[17263]	Hoang N., Uto K., Matsumoto A., & Itoh J. Pleistocene Intraplate Magmatism In The Goto Islands, Sw Japan: Implications For Mantle Source Evolution And Regional Geodynamics. J. Geodynamics 68, 1-17 (2013).
[18308]	Matsumoto A., Nakagawa M., & Nakamura Y. Re-Examination Of The Magma Plumbing System Beneath Usu Volcano, Hokkaido, Japan, During The 1663 Eruption. Bull. Volcanol. Soc. Japan, Ser. 250, 455-473 (2005).
[19989]	Shuto K., Nohara-Imanaka R., Sato M., Takahashi T., Takazawa E., Hawabata H., Takanashi K., Ban M., Watanabe N., & Fujibayashi N. Across-Arc Variations In Geochemistry Of Oligocene To Quaternary Basalts From The Ne Japan Arc: Constraints On Source Composition, Mantle Melting And Slab Input Composition. J. Petrol. 56, 2257-2294 (2015).
[20942]	Kuritani T., Sakuyama T., Kamada N., Yokoyama Tetsuya, & Nakagawa M. Fluid-Fluxed Melting Of Mantle Versus Decompression Melting Of Hydrous Mantle Plume As The Cause Of Intraplate Magmatism Over A Stagnant Slab: Implications From Fukue Volcano Group, Sw Japan. Lithos 282-283, 98-110 (2017).
[21001]	Tsukada K., Yamamoto Koshi, Gantumur O., & Nuramkhaan M. Early Paleozoic Subduction Initiation Volcanism Of The Iwatsubodani Formation, Hida Gaien Belt, Southwest Japan. Int. J. Earth Sci. 106, 1429-1451 (2017).
[21481]	Ueki K., & Iwamori H. Geochemical Differentiation Processes For Arc Magma Of The Sengan Volcanic Cluster, Northeastern Japan, Constrained From Principal Component Analysis. Lithos 290-291, 60-75 (2017).
[2311]	Fryer P. B., Taylor B. E., Langmuir C. H., & Hochstaedter A. G. Petrology And Geochemistry Of Lavas From The Sumisu And Torishima Backarc Rifts. Earth Planet. Sci. Lett. 100, 161-178 (1990).
[2328]	Taylor R. N., & Nesbitt R. W. Isotopic Characteristics Of Subduction Fluids In An Intra-Oceanic Setting, Izu-Bonin Arc, Japan. Earth Planet. Sci. Lett. 164, 79-98 (1998).
[3195]	Ikeda Y., & Yuasa M. Volcanism In Nascent Back-Arc Basins Behind The Shichito Ridge And Adjacent Area In The Izu-Ogasawara Arc, Northwest Pacific: Evidence For Mixing Between E-Type Morb And Island Arc Magmas At The Initiation Of Back-Arc Rifting. Contrib. Mineral. Petrol. 101, 377-393 (1989).
[4797]	Hochstaedter A. G., Gill J. B., Taylor B., Ishizuka O., Yuasa M., & Morita S. Across-Arc Geochemical Trends In The Izu-Bonin Arc: Constraints On Source Composition And Mantle Melting. J. Geophys. Res. B105, 495-512 (2000).
[5250]	Nakano S., Yamamoto T., & Isshiki N. Chemical Composition Of The Hachijo-Jima Volcano Group, Izu Islands: Comparison Between The Higashiyama And Nishiyama Volcanoes Based On Chemical Analyses Of Surficial Samples. Bull. Geol. Surv. Japan 48, 93-105 (1997).
[6364]	Hochstaedter A. G., Gill J. B., Peters R., Broughton P., Holden P., & Taylor B. Across Arc Geochemical Trends In The Izu-Bonin Arc: Contributions From The Subducting Slab. Geochem. Geophy. Geosy. 2 (2001).
[10427]	Taylor R. N., & Nesbitt R. W. Arc Volcanism In An Extensional Regime At The Initiation Of Subduction: A Geochemical Study Of Hahajima, Bonin Islands, Japan. Spec. Publ. Geol. Soc. London 81, 115-134 (1994).
[12116]	Yajima K., Fujimaki H., & Kuroda N. Primitive Tholeiites And Calc-Alkaline Rocks From Hahajima, Bonin (Ogasawara) Archipelago. Jap. Magazine Min. Petrol. Sci. 30, 164-179 (2001).
[14052]	Tollstrup D. L., Gill J. B., Kent A. J. R., Prinkey D., Williams Ross W., Tamura Y., & Ishizuka O. Across-Arc Geochemical Trends In The Izu-Bonin Arc: Contributions From The Subducting Slab, Revisited. Geochem. Geophy. Geosy. 11, (2010).
[15499]	Ishizuka O., Tani K., Reagan M. K., Kanayama K., Umino S., Harigane Y., Sakamoto I., Miyajima Y., Yuasa M., & Dunkley D. J. The Timescales Of Subduction Initiation And Subsequent Evolution Of An Oceanic Island Arc. Earth Planet. Sci. Lett. 306, 229-240 (2011).
[15968]	Kimura J.-I., Kent A. J. R., Rowe M. C., Katakuse M., Nakano F., Le Grange M., Van Keken P. E., Kawabata H., & Stern R. J. Origin Of Cross-Chain Geochemical Variation In Quaternary Lavas From The Northern Izu Arc: Using A Quantitative Mass Balance Approach To Identify Mantle Sources And Mantle Wedge Processes. Geochem. Geophy. Geosy. 11, (2010).
[18360]	Kanayama K., Umino S., & Ishizuka O. Shallow Submarine Volcano Group In The Early Stage Of Island Arc Development: Geology And Petrology Of Small Islands South Off Hahajima Main Island, The Ogasawara Islands. J. Asian Earth Sci. 85, 1-25 (2014).
[22497]	Tamura Y., Froger V., Sato T., & Nichols A. R. L. Nishinoshima Volcano In The Ogasawara Arc: New Continent From The Ocean? Island Arc. 28, 1-20 (2018).
[22853]	Shervais J. W., Reagan M. K., Haugen E., Almeev R. R., Pearce J. A., Prytulak J., Jaques A. L., Whattam S. A., Schissel D., Chapman T., Li Hong-Yan, Kurz W., Nelson W. R., Heaton D. E., Kirchenbaur M., Shimizu K., Sakuyama T., Li Yi-Bing, & Vetter S. K. Magmatic Response To Subduction Initiation: Part 1. Fore-Arc Basalts Of The Izu-Bonin Arc From Iodp Expedition 352. Geochem. Geophy. Geosy. 20, 3…
[23023]	Li Hong-Yan, Taylor R. N., Prytulak J., Kirchenbaur M., Shervais J. W., Ryan J. G., Godard M., Reagan M. K., & Pearce J. A. Radiogenic Isotopes Document The Start Of Subduction In The Western Pacific. Earth Planet. Sci. Lett. 518, 197-210 (2019).
[2475]	Kepezhinskas P. K., Mcdermott F., Defant M. J., Hochstaedter A. G., Drummond M. S., Hawkesworth C. J., Koloskov A. V., Maury R. C., & Bellon H. Trace Element And Sr-Nd-Pb Isotopic Constraints On A Three-Component Model Of Kamchatka Arc Petrogenesis. Geochim. Cosmochim. Acta 61, 577-600 (1997).
[2481]	Hochstaedter A. G., Kepezhinskas P. K., & Defant M. J. Insights Into The Volcanic Arc Mantle Wedge From Magnesian Lavas From The Kamchatka Arc. J. Geophys. Res. B101, 697-712 (1996).
[2485]	Kersting A. B., & Arculus R. J. Klyuchevskoy Volcano, Kamchatka, Russia: The Role Of High-Flux Recharged, Trapped, And Fractionated Magma Chamber(S) In The Genesis Of High-Al2O3 From High-Mgo Basalt. J. Petrol. 35, 1-41 (1994).
[3048]	Volynets O. N. Geochemical Types, Petrology, And Genesis Of Late Cenozoic Volcanic Rocks From The Kurile-Kamchatka Island.Arc System. Int. Geol. Rev. 36, 373-405 (1994).
[4276]	Churikova T. G., Dorendorf F., & Barman T. R. Sources And Fluids In The Mantle Wedge Below Kamchatka, Evidence From Across-Arc Geochemical Variation. J. Petrol. 42, 1567-1593 (2001).
[4788]	Dorendorf F., Churikova T. G., Koloskov A. V., & Wörner G. Late Pleistocene To Holocene Activity At Bakening Volcano And Surrounding Monogenetic Centers (Kamchatka): Volcanic Geology And Geochemical Evolution. J. Volcanol. Geotherm. Res. 104, 131-151 (2000).
[7640]	Volynets O. N., Babanskii A. D., & Goltsman Yu. V. Variations In Isotopic And Trace-Element Composition Of Lavas From Volcanoes Of The Northern Group, Kamchatka, In Relation To Specific Features Of Subduction. Geochem. Int. 38, 974-989 (2000).
[9813]	Duggen S., Portnyagin M. V., Baker J. A., Ulfbeck D. G., Hoernle K. A., Garbe-Schonberg., & Grassineau N. Drastic Shift In Lava Geochemistry In The Volcanic-Front To Rear-Arc Region Of The Southern Kamchatkan Subduction Zone: Evidence For The Transition From Slab Surface Dehydration To Sediment Melting. Geochim. Cosmochim. Acta 71, 452-480 (2007).
[10896]	Turner Simon P., Sims K. W. W., Reagan M. K., & Cook C. A 210Pb-226Ra-230Th-238U Study Of Klyuchevskoy And Bezymianny Volcanoes, Kamchatka. Geochim. Cosmochim. Acta 71, 4771-4785 (2007).
[12740]	Fedorov P. I., Kovalenko D. V., Bayanova T. B., & Serov P. A. Early Cenozoic Magmatism In The Continental Margin Of Kamchatka Petrology. 6, 261-278 (2008).
[14355]	Volynets A. O., Churikova T. G., Wörner G., Gordeychik B. N., & Layer P. W. Mafic Late Miocene-Quaternary Volcanic Rocks In The Kamchatka Back Arc Region: Implications For Subduction Geometry And Slab History At The Pacific-Aleutian Junction. Contrib. Mineral. Petrol. 159, 659-687 (2010).
[15280]	Grib E. N., Leonov V. L., & Perepelov A. B. The Karymskii Volcanic Center: Volcanic Rock Geochemistry. J. Volcanol. Seismol. 3, 367-387 (2009).
[15433]	Gorbach N. V., & Portnyagin M. V. Geology And Petrology Of The Lava Complex Of Young Shiveluch Volcano, Kamchatka. Petrology. 19, 134-166 (2011).
[18976]	Kayzar T. M., Nelson B. K., Bachmann O., Bauer A. M., & Izbekov P. E. Deciphering Petrogenic Processes Using Pb Isotope Ratios From Time-Series Samples At Bezymianny And Klyuchevskoy Volcanoes, Central Kamchatka Depression. Contrib. Mineral. Petrol. 168 (2014).
[19387]	Simakin A. G., Konnikov E. G., Bukhtiyarov P. G., & Shaposhnikova O. Yu. Eocene Accretion At Kamchatka And A Pulse Of Mantle Plume Magmatism Geochem. Int. 53, 341-357 (2015).
[19739]	Tolstykh M. L., Pevzner M. M., Naumov V. B., Babanskii A. D., & Kononkova N. N. Types Of Parental Melts Of Pyroclastic Rocks Of Various Structural-Age Complexes Of The Shiveluch Volcanic Massif, Kamchatka: Evidence From Inclusions In Minerals. Petrology 23, 480-517 (2015).
[19962]	Portnyagin M. V., Duggen S., Hauff F., Mironov N. L., Bindeman I. N., Thirlwall M. F., & Hoernle K. A. Geochemistry Of The Late Holocene Rocks From The Tolbachik Volcanic Field, Kamchatka: Quantitative Modelling Of Subduction-Related Open Magmatic Systems. J. Volcanol. Geotherm. Res. 307, 133-155 (2015).
[20025]	Zelenski M. E., Kamenetsky V. S., & Hedenquist J. W. Gold Recycling And Enrichment Beneath Volcanoes: A Case Study Of Tolbachik, Kamchatka. Earth Planet. Sci. Lett. 437, 35-46 (2016).
[20395]	Gavrilenko M. G., Ozerov A. Yu., Kyle P. R., Carr M. J., Nikulin A., Vidito C., & Danyushevsky L. V. Abrupt Transition From Fractional Crystallization To Magma Mixing At Gorely Volcano (Kamchatka) After Caldera Collapse. Bull. Volcanol. 78, (2016).
[21026]	Bergal-Kuvikas O., Nakagawa M., Kuritani T., Muravyev Y., Malik N., Klimenko E., Miyasaka A.-M., Matsumoto A., & Shimada S. A Petrological And Geochemical Study On Time-Series Samples From Klyuchevskoy Volcano, Kamchatka Arc. Contrib. Mineral. Petrol. 172, (2017).
[21486]	Zelenski M. E., Kamenetsky V. S., Mavrogenes J. A., Danyushevsky L. V., Matveev D., & Gurenko A. A. Platinum-Group Elements And Gold In Sulfide Melts From Modern Arc Basalt (Tolbachik Volcano, Kamchatka) Lithos 290-291, 172-188 (2017).
[21668]	Zelenski M. E., Kamenetsky V. S., Mavrogenes J. A., Gurenko A. A., & Danyushevsky L. V. Silicate-Sulfide Liquid Immiscibility In Modern Arc Basalt (Tolbachik Volcano, Kamchatka): Part I. Occurrence And Compositions Of Sulfide Melts Chem. Geol. 478, 102-111 (2018).
[22526]	Nekrylov N. A., Portnyagin M. V., Kamenetsky V. S., Mironov N. L., Churikova T. G., Plechov P. Yu., Abersteiner A., Gorbach N. V., Gordeychik B. N., Krasheninnikov S. P., Tobelko D. P., Shur M. Yu., Tetroeva S. A., Volynets A. O., Hoernle K. A., & Wörner G. Chromium Spinel In Late Quaternary Volcanic Rocks From Kamchatka: Implications For Spatial Compositional Variability Of Subarc Mantle And Its…
[22560]	Grib E. N., & Perepelov A. B. Olivine Basalts At The Karymskii Volcanic Center: Mineralogy, Petrogenesis, And Magma Sources. J. Volcanol. Seismol. 2, 228-247 (2008).
[22592]	Almeev R. R., Kimura J.-I., Ariskin A. A., & Ozerov A. Yu. Decoding Crystal Fractionation In Calc-Alkaline Magmas From The Bezymianny Volcano (Kamchatka, Russia) Using Mineral And Bulk Rock Compositions. J. Volcanol. Geotherm. Res. 263, 141-171 (2013).
[23355]	Siegrist M., Yogodzinski G. M., Bizimis M., Fournelle J. H., Churikova T. G., Dektor C., & Mobley R. Fragments Of Metasomatized Forearc: Origin And Implications Of Mafic And Ultramafic Xenoliths From Kharchinsky Volcano, Kamchatka. Geochem. Geophy. Geosy. 20, 4426-4456 (2019).
[3048]	Volynets O. N. Geochemical Types, Petrology, And Genesis Of Late Cenozoic Volcanic Rocks From The Kurile-Kamchatka Island.Arc System. Int. Geol. Rev. 36, 373-405 (1994).
[3890]	Ikeda Y. Geochemistry Of Miocene Back-Arc Basin Basalts From Northeast Hokkaido, Japan. J. Geol. Soc. Japan 104, 99-106. (1998).
[6973]	Shuto K., Hirahara Y., Ishimoto H., Aoki A., Jinbo A., & Goto Y. Sr And Nd Isotopic Compositions Of The Magma Source Beneath North Hokkaido, Japan: Comparison With The Back-Arc Side In The Ne Japan Arc. J. Volcanol. Geotherm. Res. 134, 57-75 (2004).
[10871]	Ishimoto H., Shuto K., & Goto Y. Middle Miocene To Quaternary Primary Basalt And High Magnesian Andesite Magmas Of North Hokkaido; Japan: Source Mantle Characteristics And Degrees Of Partial Melting. The Island Arc 15, 251-268 (2006).
[13580]	Okamura S., Sekine H., Arai K., Yamamoto Masatsugu, Nishido H., & Yahata M. K-Ar Ages And Geochemistry Of The Cenozoic Volcanic Rocks From Hamamasu Area, Central Hokkaido, Japan - Temporal Changes In Magma Geochemistry Resulted From Tectonics Of Arc- Junction. J. Geol. Soc. Japan 106, 330-346 (2000).
[16007]	Takanashi K., Kakihara Y., Ishimoto H., & Shuto K. Melting Of Crustal Rocks As A Possible Origin For Middle Miocene To Quaternary Rhyolites Of Northeast Hokkaido, Japan: Constraints From Sr And Nd Isotopes And Major- And Trace-Element Chemistry. J. Volcanol. Geotherm. Res. 221-222, 52-70 (2012).
[19410]	Hoang N., Miyagi I., & Itoh J. Miocene-Pleistocene Magmas In The Monbetsu Area, Northeast Hokkaido, Tap N-Morb-Like Sources Contaminated By Slab-Derived Fluids. J. Geodynamics 86, 10-25 (2015).
[20375]	Martynov A. Yu., Martynov Yu. A., Rybin A. V., & Kimura J.-I. Role Of Back-Arc Tectonics In The Origin Of Subduction Magmas: New Sr, Nd, And Pb Isotope Data From Middle Miocene Lavas Of Kunashir Island (Kurile Island Arc). Russ. Geol. Geophys. 56, 363-378 (2015).
[2394]	Sharaskin A. Ya. Petrography And Geochemistry Of Basement Rocks From Five Leg 60 Sites. Init. Rep. Deep Sea Drill. Proj. 60, 647-656 (1982).
[2402]	Kramer W., Kramer E., Roesler H. J., Klemm W., Schroen W., Starke R., & Lange P. Mineralogical-Geochemical Study Of The Transformation Of Basites Of Yap- And Mariana-Trench (Western Pacific). Z. Geol. Wiss. 8, 1403-1420 (1980).
[2431]	Stern R. J., Lin P.N., Morris J. D., Jackson M. C., Fryer P. B., Bloomer S. H., & Ito E. Enriched Back-Arc Basin Basalts From The Northern Mariana Trough: Implications For The Magmatic Evolution Of Back-Arc Basins. Earth Planet. Sci. Lett. 100, 210-225 (1990).
[2452]	Volpe A. M., Macdougall J. D., & Hawkins J. W. Jr. Mariana Trough Basalts (Mtb): Trace Element And Sr-Nd Isotopic Evidence For Mixing Between Morb-Like And Arc-Like Melts. Earth Planet. Sci. Lett. 82, 241-254 (1987).
[2517]	Hawkins J. W. Jr., & Melchior J. T. Petrology Of Mariana Trough And Lau Basin Basalts. J. Geophys. Res. B90, 11431-11468 (1985).
[8875]	Savov I. P., Hickey-Vargas R., D'Antonio M., Ryan J. G., & Spadea P. Petrology And Geochemistry Of West Philippine Basin Basalts And Early Palau-Kyushu Arc Volcanic Clasts From Odp Leg 195, Site 1201D: Implications For The Early History Of The Izu-Bonin-Mariana Arc. J. Petrol. 47, 277-299 (2006).
[9036]	Stern R. J., Kohut E. J., Bloomer S. H., Leybourne M. I., Fouch M., & Vervoort J. Subduction Factory Processes Beneath The Guguan Cross-Chain, Mariana Arc: No Role For Sediments, Are Serpentinites Important? Contrib. Mineral. Petrol. 151, 202-221 (2006).
[14407]	Ishizuka O., Yuasa M., Tamura Y., Shukuno H., Stern R. J., Naka J., Joshima M., & Taylor R. N. Migrating Shoshonitic Magmatism Tracks Izu-Bonin-Mariana Intra-Oceanic Arc Rift Propagation. Earth Planet. Sci. Lett. 294, 111-122 (2010).
[15489]	Ishizuka O., Taylor R. N., Yuasa M., & Ohara Y. Making And Breaking An Island Arc: A New Perspective From The Oligocene Kyushu-Palau Arc, Philippine Sea. Geochem. Geophy. Geosy. 12 (2011).
[15967]	Reagan M. K., Ishizuka O., Stern R. J., Kelley Katherine A., Lacasse C., Blichert-Toft J., Bloomer S. H., Cash J., Fryer P. B., Hanan B. B., Hickey-Vargas R., Ishii T., Kimura J.-I., Peate D. W., Rowe M. C., & Woods M. Fore-Arc Basalts And Subduction Initiation In The Izu-Bonin-Mariana System. Geochem. Geophy. Geosy. 11 (2010).
[18072]	Tamura Y., Ishizuka O., Stern R. J., Nichols A. R. L., Kawabata H., Hirahara Y., Chang Qing, Miyazaki A., Kimura J.-I., Embley R. W., & Tatsumi Y. Mission Immiscible: Distinct Subduction Components Generate Two Primary Magmas At Pagan Volcano, Mariana Arc. J. Petrol. 55, 63-101 (2014).
[20498]	Ikeda Y., Nagao K., Ishii T., Matsumoto D., Stern R. J., Kagami H., Arima M., & Bloomer S. H. Contributions Of Slab Fluid And Sediment Melt Components To Magmatism In The Mariana Arc-Trough System: Evidence From Geochemical Compositions And Sr, Nd, And Noble Gas Isotope Systematics. The Island Arc 25, 253-273 (2016).
[23441]	Yan Q., Zhang P. Y., Metcalfe I., Liu Y. G., Wu S. Y., & Shi X. F. Geochemistry Of Axial Lavas From The Mid- And Southern Mariana Trough, And Implications For Back-Arc Magmatic Processes. Mineral. Petrol. 113, 803-820 (2019).
[2669]	Ishizuka H., Kawanobe Y., & Sakai H. Petrology And Geochemistry Of Volcanic Rocks Dredged From The Okinawa Trough, An Active Back-Arc Basin. Geochem. J. 24, 75-92 (1990).
[5296]	Shinjo R. Geochemistry Of High Mg Andesites And The Tectonic Evolution Of The Okinawa Trough-Ryukyu Arc System. Chem. Geol. 157, 69-88 (1999).
[11716]	Miyoshi M., Fukuoka T., Sano T., & Hasenaka T. Subduction Influence Of Philippine Sea Plate On The Mantle Beneath Northern Kyushu, Sw Japan: An Examination Of Boron Contents In Basaltic Rocks. J. Volcanol. Geotherm. Res. 171, 73-87 (2008).
[21545]	Ishizuka O., Hickey-Vargas R., Arculus R. J., Mccoy F. W. Jr., Savov I. P., Kusano Y., Mccarthy A., Brandl P. A., & Sudo M. Age Of Izu-Bonin-Mariana Arc Basemen. Earth Planet. Sci. Lett. 481, 80-90 (2018).
[2479]	Gill J. B., & Williams Ross W. Th Isotope And U-Series Studies Of Subduction Related Volcanic Rocks. Geochim. Cosmochim. Acta 54, 1427-1442 (1990).
[4583]	Turner Simon P., & Foden J. D. U, Th And Ra Disequilibria, Sr, Nd And Pb Isotope And Trace Element Variations In Sunda Arc Lavas: Predominance Of A Subducted Sediment Component. Contrib. Mineral. Petrol. 142, 43-57 (2001).
[13319]	Chandrasekharam D., Santo A. P., Capaccioni B., Vaselli O., Alam M. A., Manetti P., & Tassi F. Volcanological And Petrological Evolution Of Barren Island (Andaman Sea, Indian Ocean). J. Asian Earth Sci. 35, 469-487 (2009).
[22262]	Belousov A. B., Belousova M., Zaw K., Streck M. J., Bindeman I. N., Meffre S. J., & Vasconcelos P. M. P. Holocene Eruptions Of Mt. Popa, Myanmar: Volcanological Evidence Of The Ongoing Subduction Of Indian Plate Along Arakan Trench J. Volcanol. Geotherm. Res. 360, 126-138 (2018).
[3260]	Gill J. B. Early Geochemical Evolution Of An Oceanic Island Arc And Backarc: Fiji And The South Fiji Basin. J. Geol. 95, 589-615 (1987).
[3324]	Gill J. B. Sr-Pb-Nd Isotopic Evidence That Both Morb And Oib Sources Contribute To Oceanic Island Arc Magmas In Fiji Earth Planet. Sci. Lett. 68, 443-458 (1984).
[3336]	Falloon T. J., Malahoff A., Zonenshain L. P., Bogdanov & Yu. A. Petrology And Geochemistry Of Back Arc Basin Basalts From Lau Basin Spreading Ridges. Mineral. Petrol. 47, 1-35 (1992).
[3597]	Sunkel G. Origin Of Petrological And Geochemical Variations Of Lau Basin Lavas (Sw Pacific). Mar. Mining 9, 205-234 (1990).
[3669]	Bloomer S. H., Ewart A., Hergt J. M., & Bryan W. B. Geochemistry And Origin Of Igneous Rocks From The Outer Tonga Forearc (Site 841) Proc. Ocean Drill. Program. Scient. Results 135, 625-646 (1996).
[4103]	Cawood P. A., & Fryer B. J. Noble Metal Abundances In Backarc Basin Basalts (Lau Basin, Southwest Pacific) Proc. Ocean Drill. Program. Scient. Results 135, 595-602 (1994).
[4105]	Hawkins J. W. Jr., & Allan J. F. Petrologic Evolution Of Lau Basin Sites 834 Through 839 Proc. Ocean Drill. Program. Scient. Results 135, 427-470 (1994).
[5515]	Gill J. B., & Whelan P. M. Early Rifting Of An Oceanic Island Arc (Fiji) Produced Shoshonitic To Tholeiitic Basalts. J. Geophys. Res. B94, 4561-4578 (1989).
[6338]	Frenzel G., Muehe R. K., & Stoffers P. Petrology Of The Volcanic Rocks From The Lau Basin, Southwest Pacific. Geol. Jb. D92, 395-479 (1990).
[6407]	Pearce J. A., Ernewein M., Bloomer S. H., Parson L. M., Murton B. J., & Johnson L. E. Geochemistry Of Lau Basin Volcanic Rocks: Influence Of Ridge Segmentation And Arc Proximity. Spec. Publ. Geol. Soc. London 81, 53-75 (1994).
[13463]	Bezos A., Escrig S., Langmuir C. H., Michael P. J., & Asimow P. D. Origins Of Chemical Diversity Of Back-Arc Basin Basalts: A Segment-Scale Study Of The Eastern Lau Spreading Center. J. Geophys. Res. B114 (2009).
[16253]	Jenner F. E., Arculus R. J., Mavrogenes J. A., Nebel O., & Hauri E. H. Chalcophile Element Systematics In Volcanic Glasses From The Northwestern Lau Basin. Geochem. Geophy. Geosy.13 (2012).
[20426]	Price A. A., Jackson M. G., Blichert-Toft J., Blusztajn J., Conatser C. S., Konter J. G., Koppers A. A. P., & Kurz M. D. Geochemical Evidence In The Northeast Lau Basin For Subduction Of The Cook-Austral Volcanic Chain In The Tonga Trench. Geochem. Geophy. Geosy. 17, 1694-1724 (2016).
[3090]	Gorton M. P. The Geochemistry And Origin Of Quaternary Volcanism In The New Hebrides. Geochim. Cosmochim. Acta 41, 1257-1270 (1977).
[3869]	Monjaret M.C., Bellon H., Maillet P., & Recy J. The New Hebrides Back-Arc Trough Volcanism (Leg 2 Seapso Cruise Of R/V Jean Charcot In The Southwestern Pacific): Preliminary K-Ar Ages And Petrological Data. Compt. Rend. Acad. Sci. Paris Ser. 2A 305, 605-609 (1987).
[3930]	Price R. C., Johnson L. E., & Crawford A. J. Basalts Of The North Fiji Basin: The Generation Of Back Arc Basin Magmas By Mixing Of Depleted And Enriched Mantle Sources. Contrib. Mineral. Petrol. 105, 106-121 (1990).
[4032]	Peate D. W., Pearce J. A., Hawkesworth C. J., Edwards C. M. H., & Hirose K. Geochemical Variations In Vanuatu Arc Lavas: The Role Of Subducted Material And A Variable Mantle Wedge Composition. J. Petrol. 38, 1331-1358 (1997).
[4033]	Eggins S. M. Origin And Differentiation Of Picritic Arc Magmas, Ambae (Aoba), Vanuatu. Contrib. Mineral. Petrol. 114, 79-100 (1993).
[4533]	Eissen J.-P., Lefevre C., Maillet P., Morvan G., & Nohara M. Petrology And Geochemistry Of The Central North Fiji Basin Spreading Centre (Southwest Pacific) Between 16°S And 22°S. Mar. Geol. 98, 201-239 (1991).
[4624]	Johnson K. T. M., & Sinton J. M. Petrology, Tectonic Setting, And The Formation Of Back-Arc Basin Basalts In The North Fiji Basin. Geol. Jb. D92, 517-545 (1990).
[4841]	Monzier M., Robin C., Eissen J.P., & Cotten J. Geochemistry Vs. Seismo-Tectonics Along The Volcanic New Hebrides Central Chain (Southwest Pacific). J. Volcanol. Geotherm. Res. 78, 1-29 (1997).
[7576]	Picard C. P., Monzier M., Eissen J.-P., & Robin C. Concomitant Evolution Of Tectonic Environment And Magma Geochemistry, Ambrym Volcano (Vanuatu, New Hebrides Arc). Spec. Publ. Geol. Soc. London 81, 135-154 (1994).
[12378]	Handley H. K., Turner Simon P., Smith I. E. M., Stewart R. B., & Cronin S. J. Rapid Timescales Of Differentiation And Evidence For Crustal Contamination At Intra-Oceanic Arcs: Geochemical And U-Th-Ra-Sr-Nd Isotopic Constraints From Lopevi Volcano, Vanuatu, Sw Pacific. Earth Planet. Sci. Lett. 273, 184-194 (2008).
[19944]	Firth C. W., Cronin S. J., Turner Simon P., Handley H. K., Gaildry C., & Smith I. E. M. Dynamics And Pre-Eruptive Conditions Of Catastrophic, Ignimbrite-Producing Eruptions From The Yenkahe Caldera, Vanuatu. J. Volcanol. Geotherm. Res. 308, 39-60 (2015).
[20672]	Metrich N., Bertagnini A., Bule E. G., Vergniolle S., Bani P., Beaumais A., & Neuville D. R. Magma Transfer And Degassing Budget: Application To The 2009-2010 Eruptive Crisis Of Mt Garet (Vanuatu Arc). J. Volcanol. Geotherm. Res. 322, 48-62 (2016).
[20673]	Beaumais A., Bertrand H., Chazot G., Dosso L., & Robin C. Temporal Magma Source Changes At Gaua Volcano, Vanuatu Island Arc. J. Volcanol. Geotherm. Res. 322, 30-47 (2016).

## Sheet: B. Archean low NbLa basalt
Sample No.	Location	SiO2 (wt. %)	TiO2	Al2O3	TFeO	MnO	MgO	CaO	Na2O	K2O	Ti (ppm)	V	Reference	2 wt.% H2O	T (℃)	P (GPa)	fO2
RG-21	Dharwar Craton	49.33	0.95	8.9	11.7276	0.19	13.7	12.32	1.18	0.17	5700	320	[12271]		1443.77	1.92009	-0.943
H-69	Dharwar Craton	51.3391	0.990399	12.5013	11.1866	0.18191	10.0758	9.98484	2.00101	0.262759	5942.4	278	[13224]		1398.97	1.59428	-1.215
SIG-233	Dharwar Craton	49.915	0.64032	10.3452	13.4694	0.2001	10.7554	10.9455	1.5908	0.34017	3841.92	225	[16345]		1503.29	2.50942	-2.778
SIG-237	Dharwar Craton	49.95	0.69958	10.6836	13.339	0.19988	10.0939	11.1033	1.73896	0.39976	4197.48	238	[16345]		1498.17	2.49989	-2.556
SIG-232	Dharwar Craton	50.6187	0.659229	10.6592	13.2568	0.192698	10.4158	10.3347	1.77485	0.314402	3955.38	216	[16345]		1490.12	2.33334	-2.228
SIG-239	Dharwar Craton	50.3067	0.553042	10.2765	12.7319	0.201106	10.8497	11.2519	1.67924	0.452489	3318.25	212	[16345]		1473.95	2.23216	-1.904
SIG-236	Dharwar Craton	50	0.659209	10.5873	12.5756	0.19976	9.80823	12.1155	1.70795	0.659209	3955.25	215	[16345]		1468.8	2.26733	-1.767
SIG-231	Dharwar Craton	50.4749	0.636621	10.4891	12.6151	0.202102	10.3476	11.5097	1.68755	0.343573	3819.73	236	[16345]		1466.73	2.13835	-1.693
SIG-240	Dharwar Craton	50.9916	0.63053	10.9631	11.5195	0.172887	9.37659	12.2038	2.04414	0.539001	3783.18	216	[16345]		1423.65	1.83821	-1.418
SIG-44	Dharwar Craton	50.1466	0.879397	13.4527	9.56684	0.167504	16.8551	7.34925	0.230318	0.0732831	5276.38	168	[17629]		1333.46	0.99636	-1.907
TVK-81	Dharwar Craton	48.7351	1.14989	11.9488	14.8671	0.19998	9.09909	9.959	1.80982	0.269973	6899.31	333	[19258]		1561.31	3.3074	-2.264
TVK-72	Dharwar Craton	49.1349	1.07011	12.5913	14.0602	0.190019	9.34093	9.32093	1.27013	1.17012	6420.64	310	[19258]		1526.68	2.92126	-2.185
TVK-83	Dharwar Craton	49.26	1.08	12.13	14.2902	0.19	9.47	9.4	1.62	0.67	6480	329	[19258]		1534.02	2.95879	-2.113
TVK-67	Dharwar Craton	49.2051	1.05989	12.0088	14.0307	0.189981	9.70903	9.40906	1.65983	0.879912	6359.36	308	[19258]		1523.14	2.89257	-2.07
TVK-157	Dharwar Craton	48.6451	0.949905	13.0087	12.8919	0.19998	9.25907	11.2789	1.86981	0.209979	5699.43	267	[19258]		1487.92	2.57761	-2.035
TVK-73	Dharwar Craton	49.3149	1.11011	11.8812	14.5942	0.190019	9.28093	9.53095	1.41014	0.760076	6660.67	358	[19258]		1546.24	3.06206	-1.925
TVK-74	Dharwar Craton	50.3	1.1	12.28	14.041	0.17	9.58	8.61	1.23	0.83	6600	322	[19258]		1513.23	2.56448	-1.879
TVK-77	Dharwar Craton	49.68	1.07	12.05	13.9432	0.18	9.33	9.78	1.44	0.7	6420	316	[19258]		1520.44	2.74791	-1.733
TVK-100	Dharwar Craton	49.61	1.29	11.31	13.0979	0.18	9.45	10.54	1.76	1.01	7740	328	[19258]		1489.3	2.56172	-1.613
TVK-70	Dharwar Craton	50.005	1.0001	12.3612	13.2238	0.190019	9.58096	9.39094	1.0101	1.48015	6000.6	311	[19258]		1487.8	2.4434	-1.524
TVK-87	Dharwar Craton	49.12	1.17	11.86	14.3169	0.19	8.98	10.53	1.63	0.29	7020	440	[19258]		1540.35	2.99993	-0.992
VB209	Dharwar Craton	47.4989	0.794171	15.4798	11.4573	0.191731	10.8379	10.4847	1.30175	0.464192	4765.03	224	[22276]		1431.29	2.18328	-1.729
VB288	Dharwar Craton	50.4054	0.874516	10.8107	11.6219	0.19525	14.0888	8.8582	1.45924	0.164421	5247.09	229	[22276]		1422.57	1.71285	-1.558
SH-12	Dharwar Craton	45.6411	0.697844	12.4258	13.0676	0.18748	14.988	8.51995	2.7393	0.0208312	4187.06	280	[22864]		1529	3.55705	-2.571
SH-47	Dharwar Craton	49.3838	0.868687	6.65657	12.9066	0.222222	13.8586	12.6869	1.27273	0.464646	5212.12	257	[22864]		1500.68	2.46304	-1.987
SH-46	Dharwar Craton	48.8285	0.706928	5.57463	12.8051	0.262573	15.4211	13.775	0.727126	0.262573	4241.57	267	[22864]		1508.36	2.41821	-1.95
SH-44	Dharwar Craton	51.6591	0.525556	11.3974	10.609	0.195796	12.9637	9.06843	1.89613	0.309151	3153.34	165	[22864]		1374.05	1.37225	-1.21
BCB-11	Dharwar Craton	48.5234	0.60925	14.539	11.5743	0.186216	10.5617	10.4585	1.56563	0.486793	3655.5	189.2	[22867]		1429.19	2.08845	-2.123
BCB-13	Dharwar Craton	48.5547	0.58297	14.9045	11.3054	0.188282	10.4079	10.6878	1.69253	0.221508	3497.82	182.36	[22867]		1417.05	1.97655	-1.958
BCB-08	Dharwar Craton	48.1527	0.651227	14.61	12.1348	0.197676	10.1909	10.4467	1.60549	0.455558	3907.36	244.65	[22867]		1454.73	2.34112	-1.439
BCB-05	Dharwar Craton	48.278	0.536872	16.3088	10.3834	0.172204	9.81564	10.8894	1.88412	0.395057	3221.23	200	[22867]		1383.38	1.83537	-1.076
106	Dharwar Craton	50.0678	1.00484	8.79749	11.6214	0.184563	13.3603	12.2324	1.06636	0.153802	6029.05	282	[5684]		1434.84	1.74659	-1.459
114	Dharwar Craton	46.8087	0.717768	17.0726	10.1955	0.164061	11.7201	10.0693	1.64061	0.184569	4306.61	204	[5684]		1380.78	1.91137	-1.115
RKY-8	Dharwar Craton	49.1483	0.721443	11.984	11.7154	0.190381	10.982	11.8938	1.60321	0.240481	4328.66	247	[9441]		1440.08	2.05178	-1.307
RKY-12	Dharwar Craton	49.2241	0.700771	11.3024	11.589	0.220242	12.5939	10.8019	1.52167	0.520573	4204.63	242	[9441]		1432.95	2.0076	-1.281
RKY-22	Dharwar Craton	51.4263	0.635017	10.7046	10.3232	0.211672	12.2064	11.2589	1.70346	0.171354	3810.1	227	[9441]		1367.49	1.29515	-0.889
RKY-1	Dharwar Craton	51.9287	0.725149	12.1865	10.5926	0.181287	10.6557	10.3334	1.84309	0.161144	4350.89	244	[9441]		1373.4	1.33399	-0.808
s_H-69	Dharwar Craton	51.3411	0.990438	12.5018	11.1835	0.181917	10.0762	9.98523	2.00109	0.262769	5942.63	278	[13224]		1398.97	1.59422	-0.917
s_H-26	Dharwar Craton	53.3062	0.808282	10.8613	12.6089	0.202071	8.76986	9.51752	2.07122	0.191967	4849.69	310	[13224]		1447.9	1.74085	-0.912
s_H-32	Dharwar Craton	51.0403	0.725835	12.9441	11.3348	0.201621	9.52658	10.2625	1.49199	0.96778	4355.01	260	[13224]		1406.03	1.70004	-0.842
s_H-10	Dharwar Craton	53.1295	0.839632	12.2101	11.4341	0.202321	9.21572	8.28504	2.84261	0.323714	5037.79	314	[13224]		1401.36	1.56302	-0.284
s_H-27	Dharwar Craton	53.5932	0.843587	11.7696	11.1865	0.19311	8.66963	9.42175	2.67305	0.162619	5061.52	300	[13224]		1389.91	1.40971	-0.172
s_H-31	Dharwar Craton	51.0612	0.658789	13.1251	10.4936	0.182434	10.0744	10.5102	1.54055	0.95271	3952.73	270	[13224]		1373.89	1.49319	-0.099
s_BAD-21	Dharwar Craton	50.8257	1.3671	9.2659	14.63	0.192407	11.0482	8.37475	1.62027	0.708867	8202.6	198	[24590]		1539.04	2.77484	-3.409
H02	Kappvaal Craton	52.226	0.588782	13.7176	9.63238	0.165272	9.89567	9.68908	1.78701	0.981304	3532.69	104	[16588]		1331.48	1.18699	-2.714
D27	Kappvaal Craton	52.6515	0.717463	13.7855	9.68542	0.167066	9.33727	8.83504	2.34713	1.10694	4304.78	153	[16588]		1331	1.2369	-1.691
AU824	Kappvaal Craton	51.8053	0.805467	8.17254	12.2926	0.225924	13.1527	9.63614	2.15119	0.147342	4832.8	261	[5321]		1448.09	1.848	-1.625
AU821	Kappvaal Craton	53.0272	0.612689	6.40359	11.5746	0.217406	13.7262	11.2656	1.34396	0.335991	3676.13	240	[5321]		1417.32	1.36522	-0.615
s_MA-20	Kappvaal Craton	50.0682	1.0485	16.0077	12.11		8.86549	7.3187	1.39107	1.2665	6290.97	324.2	[23666]		1435.26	2.006	-1.063
s_MA-10	Kappvaal Craton	49.9655	0.879749	15.9945	11.45		8.6915	9.52885	1.20833	0.18019	5278.5	289.3	[23666]		1414.18	1.70418	-0.86
s_DRH15-400.55	Kappvaal Craton	52.646	0.568122	16.8964	9.16	0.157812	9.08995	4.37664	5.22882	0.263019	3408.73	193	[23987]		1304.76	1.31815	-0.309
477378	North Atlantic Craton	49.3542	0.590702	15.6638	10.7461	0.193506	8.69758	10.8873	2.21004	0.305536	3544.21	207	[10271]		1394.82	1.83744	-1.122
220417	North Atlantic Craton	49.3053	0.684658	12.2048	9.70346	0.178606	15.886	7.81899	1.96467	0.853341	4107.95	170	[10442]		1351.12	1.5612	-1.414
485420	North Atlantic Craton	52.06	0.51	12.01	9.93907	0.19	10.12	12.66	1.23	0.01	3060	199	[11346]		1350.9	1.06576	-0.594
485468	North Atlantic Craton	50.095	0.60006	14.1214	10.3227	0.190019	9.75098	10.7811	2.67027	0.140014	3600.36	234	[11346]		1374.96	1.66189	-0.574
485469	North Atlantic Craton	50.9449	0.559944	14.4886	9.65336	0.169983	8.89911	11.2689	2.62974	0.139986	3359.66	294	[11346]		1343.42	1.38349	0.984
496117	North Atlantic Craton	48.5749	0.650065	15.4215	12.0936	0.190019	8.84088	10.401	2.13021	0.150015	3900.39	262	[11427]		1449.8	2.29582	-0.957
496122	North Atlantic Craton	48.7	0.5	16.56	9.52976	0.21	9.93	10.96	2.07	0.32	3000	216	[11427]		1347.09	1.57993	-0.084
485465	North Atlantic Craton	48.2248	0.570057	13.1513	11.4084	0.260026	10.401	13.0613	1.33013	0.150015	3420.34	218	[11627]		1434.66	2.06214	-1.508
485461	North Atlantic Craton	47.4653	0.559944	14.7385	11.4328	0.239976	9.39906	12.8987	1.60984	0.209979	3359.66	225	[11627]		1439.69	2.26678	-1.448
485460	North Atlantic Craton	47.44	0.56	14.85	11.3005	0.24	9.38	12.98	1.63	0.19	3360	227	[11627]		1430.42	2.19093	-1.192
485462	North Atlantic Craton	50.3301	0.55011	12.2324	10.9823	0.240048	10.3221	11.8324	1.86037	0.25005	3300.66	229	[11627]		1400.96	1.6829	-0.883
485457	North Atlantic Craton	49.4751	0.559944	14.5485	10.294	0.229977	8.64914	12.8887	1.88981	0.149985	3359.66	251	[11627]		1379.22	1.63124	-0.43
485459	North Atlantic Craton	51.9752	0.530053	13.2813	9.95786	0.220022	8.59086	12.0812	1.94019	0.150015	3180.32	231	[11627]		1350.24	1.22201	-0.006
465617C2	North Atlantic Craton	49.9	0.88	10.67	13.2135	0.27	9.86	11.84	1.4	0.29	5280	259	[12870]		1494.37	2.40376	-2.197
465617A2	North Atlantic Craton	50.57	0.91	10.24	13.5606	0.26	10.04	11.04	1.12	0.52	5460	268	[12870]		1504.01	2.39653	-2.081
465617B2	North Atlantic Craton	50.6451	0.880088	10.5911	12.7521	0.270027	9.63096	11.7312	1.46015	0.410041	5280.53	254	[12870]		1471.88	2.14819	-1.781
498271	North Atlantic Craton	47.9	0.7	14.6	11.2738	0.2	11.2	10.17	1.9	0.61	4200	206	[13799]		1421.19	2.17457	-1.412
498265	North Atlantic Craton	49.0245	1.0005	15.5578	11.9026	0.190095	9.34467	9.09455	2.16108	0.18009	6003	277	[13799]		1436.71	2.13771	-1.371
498218	North Atlantic Craton	48.1096	0.65013	16.0332	11.5163	0.20004	8.66173	10.2821	2.70054	0.35007	3900.78	240	[13799]		1433.13	2.34044	-1.328
499713B	North Atlantic Craton	48.3387	0.610488	15.8127	10.419	0.220176	9.00721	12.3098	1.69135	0.2502	3662.93	147	[13810]		1386.38	1.79107	-2.887
499705MA	North Atlantic Craton	48.6659	0.59958	12.9909	11.8261	0.229839	9.49335	13.2907	1.22914	0.159888	3597.48	239	[13810]		1447.76	2.10187	-1.473
497134	North Atlantic Craton	47.757	0.759317	16.3853	10.1346	0.169847	9.09182	11.1899	2.69757	0.49955	4555.9	213	[13997]		1379.18	2.00274	-1.334
508074	North Atlantic Craton	47.5857	0.829751	16.695	11.6529	0.19994	8.9973	9.79706	2.39928	0.339898	4978.51	246	[15563]		1440.85	2.41529	-1.693
508948	North Atlantic Craton	47.0282	0.790474	16.0096	10.3279	0.180108	10.2061	10.8065	2.90174	0.420252	4742.85	228	[15563]		1390.88	2.19422	-1.072
JEH-2007-20	North Atlantic Craton	52.0148	0.77921	9.43148	11.1655	0.212512	12.7507	10.6256	1.46734	0.131555	4675.26	154	[15680]		1397.75	1.37235	-2.521
JEH-2007-23	North Atlantic Craton	52.9602	0.753664	13.8511	9.69666	0.162954	10.3883	9.06434	1.73139	0.142585	4521.98	188	[15680]		1327.71	0.994299	-1.299
468796	North Atlantic Craton	46.2767	0.684505	12.3107	11.757	0.186683	17.3927	8.78448	0.96453	0.0933416	4107.03	139	[16158]		1463.85	2.46315	-3.505
468795	North Atlantic Craton	47.1307	0.667283	14.2798	11.0163	0.164254	14.5673	9.29063	1.41669	0.0307977	4003.7	152	[16158]		1416.81	2.05618	-2.86
510802	North Atlantic Craton	47.8895	0.860411	15.4773	12.6278	0.192327	9.40379	9.35317	2.41927	0.151837	5162.47	261	[16158]		1477.99	2.66323	-2.036
511194	North Atlantic Craton	50.5395	0.95684	14.5155	10.6243	0.152687	9.23249	9.4259	2.86034	0.223941	5741.04	167	[16158]		1380.76	1.68817	-1.809
511185	North Atlantic Craton	49.2993	0.695635	15.4955	11.4824	0.18147	8.87186	9.71872	2.49017	0.30245	4173.81	223	[16158]		1423.72	2.08739	-1.621
515804	North Atlantic Craton	49.1049	0.859715	15.2625	11.3936	0.171943	9.39618	9.82098	2.4072	0.101143	5158.29	249	[16158]		1418.14	2.02025	-1.425
511152	North Atlantic Craton	48.335	0.653728	15.7201	10.4886	0.183861	8.6619	12.002	2.09397	0.531154	3922.37	232	[16158]		1393.79	1.95093	-1.022
510938	North Atlantic Craton	50.7035	0.785073	15.4364	10.6689	0.173328	8.63581	10.053	2.04935	0.112153	4710.44	267	[16158]		1383.45	1.57369	-0.911
468775	North Atlantic Craton	47.1947	0.50638	17.4397	9.5973	0.172169	9.25663	12.8216	1.62042	0.141787	3038.28	187	[16158]		1361.6	1.72426	-0.573
879324	North Atlantic Craton	52.0325	0.813008	8.85163	11.4209	0.223577	16.8496	6.91057	1.25	0.162602	4878.05	139	[17073]		1410.62	1.3739	-2.69
879335	North Atlantic Craton	52.1967	0.755744	8.36356	11.1628	0.221685	15.7799	8.19226	1.77348	0.100766	4534.46	155	[17073]		1398.63	1.36949	-2.604
510906	North Atlantic Craton	47.1531	0.653733	16.6491	11.0803	0.168705	12.0413	9.34205	1.44454	0.0421763	3922.4	176	[17073]		1415.78	2.06858	-1.984
510631	North Atlantic Craton	47.159	0.613692	18.2097	9.85738	0.158713	10.729	11.0041	0.973442	0.0211618	3682.15	164	[17073]		1363.84	1.64086	-1.701
510970	North Atlantic Craton	47.8198	0.730152	11.1888	12.097	0.205677	15.3126	9.45084	1.00782	0.647882	4380.91	253	[17073]		1464.2	2.3579	-1.38
510971	North Atlantic Craton	48.723	0.806535	11.2088	11.7585	0.206804	14.6831	9.15107	1.56137	0.392927	4839.21	297	[17073]		1443.7	2.1313	-0.956
511116	North Atlantic Craton	47.3625	0.600815	17.0367	9.86754	0.183299	10.3564	10.7536	1.92464	0.631365	3604.89	198	[17073]		1368.57	1.88136	-0.953
510990	North Atlantic Craton	49.8322	0.471995	10.5937	10.2849	0.178309	16.0688	11.0761	0.157332	0.0314663	2831.97	195	[17073]		1377.94	1.20734	-0.903
510878	North Atlantic Craton	50.1407	0.489941	11.9045	10.6576	0.187637	14.2708	9.28802	1.35515	0.333577	2939.64	197	[17073]		1383.38	1.49913	-0.814
510840	North Atlantic Craton	51.8739	0.544204	11.7158	10.644	0.225896	12.4756	9.36441	1.36564	0.420988	3265.22	211	[17073]		1374.73	1.29966	-0.743
510662	North Atlantic Craton	48.8568	0.473738	9.85582	10.071	0.185376	15.9217	11.7817	1.14315	0.432544	2842.43	196	[17073]		1377.6	1.53145	-0.724
514302	North Atlantic Craton	48.6458	0.700119	7.45689	13.2519	0.227849	14.6031	12.3142	0.963182	0.144995	4200.71	173	[20907]		1520.24	2.64015	-3.297
514324	North Atlantic Craton	48.6276	0.706317	7.45499	13.2577	0.225815	14.6213	12.3013	0.969252	0.144357	4237.9	184	[20907]		1520.79	2.64958	-3.021
SG-111	North Atlantic Craton	47.5377	0.553338	14.5943	11.3542	0.207502	10.6023	11.5213	1.81811	0.375479	3320.03	166	[23015]		1431.68	2.25475	-2.325
SG-128	North Atlantic Craton	47.9057	0.662337	15.6588	10.069	0.15817	10.5084	11.6749	1.82884	0.237255	3974.02	198	[23015]		1375.43	1.78249	-1.617
SG-106	North Atlantic Craton	47.4259	0.61284	14.2337	11.0454	0.207575	11.5451	11.6341	1.42337	0.474457	3677.04	212	[23015]		1420.89	2.12798	-1.422
SG-117	North Atlantic Craton	48.6064	0.750983	12.2825	11.5011	0.21739	10.9881	12.0553	1.63042	0.494068	4505.9	226	[23015]		1435.61	2.12779	-1.359
SG-130	North Atlantic Craton	47.9303	0.662402	15.3934	9.98204	0.177959	9.43182	12.9515	1.98721	0.187845	3974.41	215	[23015]		1373.59	1.77267	-1.287
SG-076A	North Atlantic Craton	47.9047	0.632797	15.7705	10.6087	0.197749	9.68971	11.2223	2.13569	0.484485	3796.78	218	[23015]		1399.16	2.03934	-1.071
SG-043	North Atlantic Craton	49.01	0.741527	15.5029	10.2073	0.16808	8.77969	11.6964	2.35311	0.227402	4449.16	235	[23015]		1378.35	1.76819	-0.975
SG-104	North Atlantic Craton	47.7373	0.54393	15.0125	10.4154	0.187903	11.294	11.472	1.61201	0.405475	3263.58	214	[23015]		1389.35	1.88353	-0.949
JEH-2007-01	North Atlantic Craton	52.7011	0.820016	13.6703	10.2329	0.180004	9.73019	9.28019	1.93004	0.140003	4920.1	195	[23081]		1351.67	1.17021	-0.732
289141	North Atlantic Craton	48.0763	0.625678	15.1979	10.3915	0.181648	10.5154	10.9796	2.16969	0.544945	3754.07	214	[6045]		1388.98	1.95901	-1.496
339196	North Atlantic Craton	53.2424	0.46028	10.9567	9.24105	0.170103	14.749	7.30444	1.85113	0.770468	2761.68	165	[6045]		1307.83	0.913984	-0.438
278812	North Atlantic Craton	53.3909	0.620591	13.4228	9.56976	0.160153	9.81936	9.2388	1.9919	0.520496	3723.55	194	[6045]		1324.21	1.02263	-0.68
2000-14	North Atlantic Craton	48.7649	0.670067	8.89089	13.0013	0.230023	13.9814	11.3911	1.27013	0.120012	4020.4	174	[7552]		1501.74	2.51762	-3.57
36770	North Atlantic Craton	51.6252	0.620062	8.31083	11.5508	0.190019	14.7815	8.61086	2.26023	0.540054	3720.37	151	[7552]		1417.46	1.70981	-3.163
36647	North Atlantic Craton	51.0051	0.590059	8.09081	11.5686	0.190019	15.1415	10.101	1.80018	0.010001	3540.35	136	[7552]		1427.03	1.68159	-3.063
36617	North Atlantic Craton	51.0898	0.59988	7.95841	11.6007	0.19996	15.177	10.088	1.77964	0.009998	3599.28	140	[7552]		1427.36	1.66948	-2.916
2000-19	North Atlantic Craton	50.9602	0.590118	7.9916	11.6676	0.170034	15.2831	10.052	1.72034	0.05001	3540.71	147	[7552]		1430.3	1.69908	-2.827
36831	North Atlantic Craton	51.18	0.63	8	11.95	0.19	14.81	9.45	1.85	0.39	3780	150	[7552]		1439.47	1.82626	-2.768
465425	North Atlantic Craton	50.9451	0.640064	7.72077	11.5508	0.220022	15.6916	10.161	0.070007	1.49015	3840.38	179	[7552]		1427.09	1.62239	-2.54
36800	North Atlantic Craton	51.2	0.62	8.38	11.425	0.19	14.42	10.03	2.19	0.07	3720	149	[7552]		1419.1	1.68998	-2.48
465418	North Atlantic Craton	49.2751	0.879912	10.059	13.6393	0.219978	10.9089	11.3889	1.12989	0.769923	5279.47	252	[7552]		1515.66	2.70402	-2.462
465417	North Atlantic Craton	49.605	1.0499	11.8988	13.2923	0.189981	9.989	9.33907	1.50985	1.42986	6299.37	248	[7552]		1492.5	2.60821	-2.256
2000-13	North Atlantic Craton	50.72	0.64	8.3	11.9322	0.22	13.98	11.01	1.57	0.07	3840	170	[7552]		1443.95	1.8186	-2.187
36861	North Atlantic Craton	51.4749	0.59994	8.87911	11.068	0.189981	14.6185	9.48905	2.21978	0.009999	3599.64	147	[7552]		1397.9	1.51176	-2.1
36739	North Atlantic Craton	51.94	0.58	8.67	10.8912	0.19	14.5	9.56	2.24	0.01	3480	140	[7552]		1388.4	1.40501	-2.091
36678	North Atlantic Craton	51.7052	0.780078	10.281	12.1292	0.250025	9.36094	11.4011	2.37024	0.150015	4680.47	210	[7552]		1440.3	1.88331	-2.065
465402	North Atlantic Craton	51.5652	0.460046	5.94059	10.296	0.180018	17.2917	10.8911	0.70007	1.39014	2760.28	128	[7552]		1375.6	1.26218	-1.99
465401	North Atlantic Craton	53.1206	0.870174	10.7421	12.4597	0.420084	8.86177	8.92178	0.130026	2.87057	5221.04	256	[7552]		1437.57	1.76599	-1.666
362698	North Atlantic Craton	46.6095	0.578413	14.271	10.7967	0.168266	16.8371	7.88745	1.31457	0.157749	3470.48	192	[9713]		1415.99	2.12139	-2.042
362652	North Atlantic Craton	51.1467	0.713577	17.9444	10.2847	0.1679	9.57032	5.35183	2.18271	1.33271	4281.46	218	[9713]		1351.35	1.47302	-1.058
362684	North Atlantic Craton	50.4299	0.622071	15.6888	10.5305	0.179241	12.1778	6.8955	2.07708	0.0632614	3732.42	211	[9713]		1369.34	1.47925	-0.856
s_176765	Pilbarn Craton	53.5834	0.876199	10.3559	11.27	0.21905	9.19	9.48778	3.21509	0.327061	5203.66	251	[14137]		1394.55	1.52536	-0.916
s_180203	Pilbarn Craton	49.5905	0.551512	15.6309	9.3437	0.188569	9.15166	12.7061	1.56938	0.0719805	3261.28	201	[14137]		1336.52	1.30293	-0.763
s_180201	Pilbarn Craton	50.0295	0.553012	15.8334	9.02278	0.152413	10.7616	11.6277	0.84445	0.0185367	3219.32	185	[14137]		1313.8	1.03112	-0.502
s_179821	Pilbarn Craton	50.7882	0.521177	10.8117	10.7232	0.243082	9.97538	14.2608	1.1884	0.126043	3123.39	240	[14137]		1390.57	1.3978	-0.361
s_180218	Pilbarn Craton	50.5333	0.790925	14.8649	10.7455	0.184174	8.97235	11.163	1.29024	0.0572986	4634.14	314	[14137]		1387.56	1.49121	0.071
s_TS-2-1	Pilbarn Craton	52.1723	1.07482	9.10901	12.51	0.223625	9.79466	10.4935	2.15474	0.952162	6448.95	226.595	[24725]		1453.94	2.01772	-2.275
s_DW	Pilbarn Craton	51.1088	1.09249	9.13745	12.98	0.247624	10.2085	11.1088	1.72611	0.826059	6554.92	243.891	[24725]		1477.66	2.24254	-1.924
s_5.8	Pilbarn Craton	50.6186	0.810138	6.11104	11.97	0.220038	12.5821	14.6725	1.54026	0.0800136	4860.83	187.546	[24900]		1455.99	1.87538	-2.756
s_5-6A	Pilbarn Craton	52.6219	0.951663	10.6286	12.44	0.220385	13.6038	7.91383	0.140245	0.0100175	5709.98	272.291	[24900]		1442.37	1.38575	-2.092
s_3.6	Pilbarn Craton	50.5364	0.610078	10.3113	11.38	0.140018	17.3222	8.30106	0.0800102	0.0100013	3660.47	192.428	[24900]		1415.58	1.36288	-2.015
s_JDK23	Pilbarn Craton	50.0047	0.883088	14.2646	10.85	0.258815	8.67808	10.3735	2.65094	0.187544	5298.53	261.699	[24984]		1395.56	1.79554	-1.414
DY-37	Superior Province	46.2331	0.724444	10.6512	13.2304	0.296668	15.865	9.91944	1.23891	0.15245	4346.66	240.5	[12751]		1534.71	3.24256	-2.544
BA-24	Superior Province	48.5149	0.650065	15.5616	11.2571	0.180018	8.81088	10.9111	1.91019	0.750075	3900.39	272.88	[13002]		1419.82	2.12267	-0.537
52-IL-98-12	Superior Province	51.5447	0.67299	14.2281	10.8919	0.263255	10.3561	6.79136	3.37007	0.471196	4037.94	184.893	[18456]		1382.61	1.68378	-1.3
52-IL-98-36	Superior Province	50.6991	0.638177	13.1592	9.96671	0.175524	9.99371	11.8504	1.87699	0.344961	3829.06	210.058	[18456]		1354.71	1.36964	-1.11
PIC-93	Superior Province	48.3801	0.913219	13.1237	12.2777	0.205218	11.9232	9.36819	2.06244	0.123131	5479.32	234	[18733]		1459.83	2.36225	-2.065
PIC-41	Superior Province	49.5094	0.686066	12.4004	11.169	0.204796	11.1716	11.3047	1.9558	0.143357	4116.39	231	[18733]		1414.31	1.86342	-1.236
SP05-006-34	Superior Province	47.381	0.528861	10.5772	11.8792	0.204122	16.3091	10.0824	1.04123	0.484531	3173.16	204	[22697]		1467.08	2.42002	-1.93
SP06-006-37	Superior Province	47.3332	0.667085	11.1626	11.533	0.195294	16.5281	9.69277	1.00731	0.400868	4002.51	217	[22697]		1447.61	2.23908	-1.884
SP06-004-39	Superior Province	48.524	0.567757	11.6354	11.0736	0.204476	15.0295	10.0577	0.871876	0.622768	3406.54	209	[22697]		1416.65	1.86795	-1.584
96TB0023	Superior Province	51.5922	0.868486	8.2713	12.2357	0.227461	13.7304	10.5045	0.930521	0.0413565	5210.92	210	[5196]		1447.3	1.63443	-1.987
96TB0023	Superior Province	51.5922	0.868486	8.2713	12.2357	0.227461	13.7304	10.5045	0.930521	0.0413565	5210.92	210	[5196]		1447.3	1.63443	-1.938
DH96-10	Superior Province	51.0698	0.819836	10.7279	11.3872	0.19996	14.2971	9.0082	0.869826	0.129974	4919.02	252	[5198]		1408.79	1.4432	-1.334
HEG-15	Superior Province	50.57	0.73	12.87	11.5407	0.21	9.56	10.54	2.2	0.29	4380	279	[5198]		1420.58	1.86656	-0.986
SC95-53	Superior Province	49.1149	0.60006	10.5511	12.3695	0.220022	16.3016	8.17082	1.0101	0.080008	3600.36	252	[5198]		1465.51	2.08107	-0.956
SC95-54	Superior Province	50.6636	0.663577	11.9023	11.4341	0.210659	10.0801	11.5863	1.8854	0.10533	3981.46	294	[5198]		1415.53	1.73116	-0.128
SC95-7	Superior Province	51.4254	0.60018	11.3834	10.4138	0.190057	13.304	8.86266	1.95059	0.540162	3601.08	262	[5198]		1369.16	1.40761	0.222
HEG-12	Superior Province	50.425	0.569943	14.3386	10.6765	0.239976	8.65913	12.1988	1.12989	0.409959	3419.66	292	[5198]		1388.6	1.52935	0.693
PBA92-2008G	Superior Province	52.9745	0.525701	12.0305	9.11752	0.181973	12.2327	8.97735	2.7296	0.0606578	3154.2	180	[5306]		1307.19	0.990756	-0.703
95-KYT-22	Superior Province	47.2919	0.748156	16.9968	10.9983	0.189673	9.22023	11.7597	1.24341	0.0948367	4488.94	214	[5524]		1416.18	2.03591	-1.742
SC95-117	Superior Province	50.3101	0.95019	14.803	11.3917	0.130026	8.60172	9.80196	2.40048	0.10002	5701.14	268	[5575]		1411.83	1.84181	-0.956
HEG-18	Superior Province	50.5293	0.728979	12.882	11.5512	0.209706	9.58658	10.4853	2.19692	0.299581	4373.88	279	[5575]		1421.2	1.87434	-0.682
C76	Superior Province	49.4135	0.711779	12.2306	9.4466	0.170426	13.0426	11.0977	2.60652	0.0300752	4270.68	225	[5579]		1343.6	1.48411	-0.548
C125	Superior Province	50.7722	0.631769	13.2371	10.083	0.21059	9.82752	10.2286	3.54994	0.150421	3790.61	269	[5579]		1361.5	1.63362	0.497
HE6-4	Superior Province	52.6646	0.731452	13.2706	9.48376	0.208986	8.98642	9.40439	2.40334	1.25392	4388.71	169	[5672]		1325.06	1.22068	-1.341
96KYT02	Superior Province	47.4803	0.957725	14.4492	12.8392	0.208201	10.7119	9.4211	1.94668	0.322712	5746.35	291	[5746]		1486.88	2.73765	-1.761
KYT188	Superior Province	49.01	0.762517	13.2239	10.8424	0.177572	10.2992	12.7852	1.46236	0.0313363	4575.1	244	[5746]		1403.6	1.74093	-1.258
96KYT07	Superior Province	51.6704	0.6995	10.76	10.8486	0.216022	13.5888	8.45572	2.11907	0.236596	4197	222	[5746]		1383.07	1.439	-1.093
96KYT13	Superior Province	50.4258	0.824483	12.7744	11.2519	0.183219	10.2806	10.2806	1.98487	0.529298	4946.9	254	[5746]		1409.25	1.79676	-0.919
96KYT16	Superior Province	51.2777	0.84045	13.4882	10.339	0.204988	8.88622	10.5569	2.37786	0.66621	5042.7	272	[5746]		1367.28	1.52185	-0.261
SC95-81	Superior Province	48.371	0.939436	16.0404	11.8717	0.209874	8.81471	9.11453	2.79832	0.29982	5636.62	401	[5755]		1440.49	2.36359	0.054
87RPS-0046	Superior Province	52.9	0.44	12.44	9.57425	0.16	13.91	6.8	2.54	0.04	2640	191	[5823]		1321.9	1.02815	-0.102
JW-7	Superior Province	51.6543	0.723739	12.6964	8.97896	0.175765	10.8561	8.11621	2.70885	2.69851	4342.43	165	[5844]		1306.96	1.42623	-1.14
JW-19	Superior Province	51.1628	0.58654	12.163	9.50414	0.205804	11.453	9.99177	2.24326	1.26569	3519.24	185	[5844]		1332.79	1.36839	-1.027
8726	Superior Province	48.4	1.15	16.78	11.0157	0.19	9.03	8.32	1.82	1.68	6900	259	[5847]		1404.94	2.11828	-1.619
461	Superior Province	48.4717	0.792993	16.8511	9.80225	0.168511	8.83196	10.8045	3.04311		4757.96	200	[7098]		1363.53	1.80996	-0.946
23214	Superior Province	51.5806	0.614054	11.8255	10.7147	0.178274	12.8258	8.33925	2.58497	0.0099041	3684.33	227	[7161]		1375.74	1.45443	-0.926
22180	Superior Province	52.5996	0.525996	10.6092	9.17624	0.168716	15.8394	7.88002	1.99482	0.00992446	3155.98	177	[7161]		1309.34	0.88815	-0.411
22179	Superior Province	53.8156	0.644201	13.1516	9.24201	0.158573	12.0614	6.39246	3.29038	0.00991079	3865.21	220	[7161]		1304.94	0.974486	-0.066
SL95-4	Superior Province	48.66	0.59	16.29	10.2594	0.15	9.6	11.85	1.17	0.12	3540	204	[7218]		1375.61	1.59035	-1.155
96-26-24	Superior Province	53.8829	0.810895	13.7852	8.21439	0.145545	8.90945	7.46439	3.202	2.29754	4865.37	165	[8685]		1268	1.06566	-0.687
6046B	Superior Province	48.3623	0.489012	18.3529	8.16264	0.149697	9.05171	10.8281	1.99597	1.36724	2934.07	167	[9142]		1291.48	1.42507	-0.275
PK95-1	Superior Province	50.325	0.870087	14.2214	12.8322	0.220022	9.88099	7.0007	2.92029	0.080008	5220.52	339	[9150]		1464.44	2.27988	-1.124
ML88-11	Superior Province	50.36	0.69	11.59	11.078	0.21	13.43	8.38	2.24	0.4	4140	241	[9150]		1400.06	1.72732	-1.014
SE10-5	Yilgarn Craton	52.0554	0.640364	12.3425	10.7526	0.185912	11.9913	8.78951	1.5596	0.278868	3842.18	196	[13778]		1375.37	1.30037	-1.528
SE10-3	Yilgarn Craton	52.1449	0.532304	11.1888	10.4666	0.187872	13.245	9.19528	0.636677	1.04373	3193.82	179	[13778]		1366.25	1.19231	-1.497
KD330-1	Yilgarn Craton	53.7517	0.640151	13.1808	10.421	0.167908	10.2634	7.90219	1.98342	0.335817	3840.91	210	[13778]		1351.78	1.09919	-1.115
CD339W3-6	Yilgarn Craton	53.3859	0.425179	8.72135	10.307	0.186664	17.6086	6.76138	1.15109	0.134813	2551.07	162	[13778]		1358.53	0.914266	-1.104
KD330-4	Yilgarn Craton	52.9712	0.61262	12.7629	9.99367	0.173576	10.6902	8.03553	2.767	0.694303	3675.72	209	[13778]		1340.2	1.25067	-0.608
CD339 W3-9	Yilgarn Craton	50.1232	0.63655	13.7372	10.3688	0.184805	12.0739	10.1745	1.29363	0.0513347	3819.3	203	[14216]		1370.27	1.39432	-1.446
CD339 W3-10	Yilgarn Craton	50.7127	0.66178	14.4268	10.1917	0.183262	10.2423	10.1405	1.91407	0.193443	3970.68	206	[14216]		1360.09	1.40366	-0.706
OB1	Yilgarn Craton	48.3166	0.424738	11.613	10.2042	0.217549	17.2485	9.32353	1.27422	0.0725163	2548.43	178	[14216]		1382.65	1.63224	-0.703
CD339 W3-11	Yilgarn Craton	49.6938	0.716139	16.4297	9.7153	0.155682	11.9045	7.97094	2.08614	0.0415153	4296.83	232	[14216]		1341.53	1.40421	-0.37
BA3	Yilgarn Craton	50.5336	0.611336	16.0398	10.1049	0.176148	8.92136	10.7761	1.47135	0.0518081	3668.01	241	[14216]		1358.58	1.34799	-0.315
NMXD36-2	Yilgarn Craton	50.9069	0.512348	14.438	10.1845	0.194692	11.036	8.92509	2.32606	0.163951	3074.09	217	[14216]		1356.94	1.41933	0.001
MRD001-2	Yilgarn Craton	50.3157	0.526205	10.6504	11.2559	0.210482	17.3963	7.68259	0.273627	0.252578	3157.23	196	[14487]		1413.2	1.44409	-1.489
SUDD003-260.7	Yilgarn Craton	50.065	0.574321	10.6943	11.7438	0.207944	15.8631	9.34757		0.00990209	3445.93	218.98	[15917]		1435.4	1.55326	-1.377
SUDD003-220.1	Yilgarn Craton	51.5542	0.584043	11.1067	11.8557	0.188082	13.3835	8.79035	1.0196	0.00989904	3504.26	219.39	[15917]		1425.28	1.5232	-1.053
SUDD003-287.7	Yilgarn Craton	47.9984	0.595021	11.5037	10.1714	0.257843	15.1433	10.879	2.10241	0.0396681	3570.13	218.52	[15917]		1387.77	1.84537	-0.885
WD103-193.4	Yilgarn Craton	52.3125	0.608633	13.5296	10.2138	0.159642	9.65832	8.25147	3.80146	0.159642	3651.8	247.73	[15917]		1355.03	1.47592	0.114
KM-9	Yilgarn Craton	53.3766	0.504427	14.7828	9.10502	0.0926498	9.92382	8.98703	1.94565	0.102944	3026.56	229	[16962]		1302.34	0.872492	0.48
PHAG044	Yilgarn Craton	48.4581	0.614691	10.9108	11.8689	0.204897	16.7196	8.62617	0.840078	0.235632	3688.15	198.453	[19865]		1453.56	2.07165	-1.955
PHAG048	Yilgarn Craton	49.8255	0.523614	9.95893	10.6246	0.184805	17.0945	9.18891	0.965092	0.277207	3141.68	171.008	[19865]		1392.43	1.48413	-1.779
PHAG040	Yilgarn Craton	47.5663	0.634889	11.2365	11.3343	0.21163	14.6528	11.7001	1.10854	0.100776	3809.33	224.4	[19865]		1438.42	2.09542	-1.631
AW024	Yilgarn Craton	49.0572	0.75632	15.4994	10.7491	0.18649	11.2826	8.84791	2.13427	0.0725238	4537.92	216.928	[19865]		1388.92	1.76838	-1.586
MN239	Yilgarn Craton	49.7882	0.692077	11.5691	12.0405	0.20659	15.0811	8.1913	0.857349	0.0619771	4152.46	226.02	[19865]		1444.69	1.82481	-1.566
PHAG056	Yilgarn Craton	51.7016	0.679224	12.7447	10.3949	0.196341	8.9129	12.7631	1.00754	0.25945	4075.34	207.335	[19865]		1371.12	1.23725	-1.041
PH119	Yilgarn Craton	49.9028	0.563005	13.2255	11.2307	0.235439	11.905	9.45849	1.89375	0.14331	3378.03	227.34	[19865]		1409.35	1.77995	-0.703
PH106	Yilgarn Craton	50.2409	0.572174	14.736	9.75368	0.200763	10.4698	10.5802	2.08793	0.100381	3433.05	214.533	[19865]		1345.96	1.38026	-0.418
UB1	Yilgarn Craton	51.7266	0.496278	13.2031	9.17215	0.165426	12.7895	8.33333	2.8536	0.0723739	2977.67	184.62	[19865]		1314.65	1.16275	0.039
221722	Yilgarn Craton	52.2053	0.616719	8.98354	10.2252	0.185016	14.3798	9.65166	1.93239	0.493375	3700.32	188	[21872]		1360.83	1.24204	-1.236
209118	Yilgarn Craton	50.9948	0.620752	9.05263	10.1631	0.196571	15.8809	10.1803	1.38635	0.206917	3724.51	195	[21872]		1365.13	1.24073	-1.157
209117	Yilgarn Craton	53.1066	0.638846	10.51	9.77359	0.164863	14.3225	7.63524	2.20505	0.370943	3833.08	168	[21872]		1332.3	1.04241	-0.82
83531	Yilgarn Craton	49.6768	1.07748	8.42483	13.3036	0.205233	14.1098	10.0462	1.39559	0.030785	6464.85	264.936	[23005]		1503.04	2.4072	-2.337
224993	Yilgarn Craton	53.0726	0.60854	4.98803	10.7852	0.209497	13.9166	14.166	0.768156	0.109737	3651.24	181.577	[23005]		1391.37	0.978933	-2.005
MMD22-7-77	Yilgarn Craton	50.5114	0.845335	8.21332	12.1649	0.219161	12.106	11.8973	2.0455	0.427886	5072.01	241.247	[23005]		1456.58	2.09953	-1.936
ME-7C	Yilgarn Craton	50.31	0.82	9.54	11.2827	0.19	16.19	8.34	1.62	0.24	4920	204.497	[23005]		1413.68	1.67775	-1.855
MMD17-12-20	Yilgarn Craton	49.6643	0.89141	11.3336	12.7217	0.231535	9.15721	12.6765	1.47025	0.219958	5348.46	242.857	[23005]		1478.34	2.2943	-1.782
81781	Yilgarn Craton	51.5913	0.91456	10.0703	12.4056	0.203236	10.6597	10.2634	2.14413	0.132103	5487.36	271.894	[23005]		1452.07	1.93541	-1.679
83533	Yilgarn Craton	50.8736	0.970675	9.20609	12.5647	0.163482	12.2101	10.6774	1.64504	0.0613058	5824.05	289.746	[23005]		1463.63	1.99199	-1.468
MS74	Yilgarn Craton	51.3372	1.03494	9.86781	12.1722	0.174198	11.4254	9.85757	2.23384	0.307409	6209.65	298.182	[23005]		1443.32	1.92678	-1.298
81572	Yilgarn Craton	51.2941	0.57289	13.6368	11.5606	0.214834	9.56522	9.30946	2.05627	0.296675	3437.34	215.557	[23005]		1412.92	1.71641	-1.274
ME-7E	Yilgarn Craton	53.06	0.85	9.67	10.4996	0.17	13.92	8.06	2.32	0.08	5100	199.195	[23005]		1361.13	1.1694	-1.181
MS73	Yilgarn Craton	51.8087	0.970775	9.28878	12.2295	0.173718	11.7515	10.372	1.71674	0.0919681	5824.65	277.513	[23005]		1443.21	1.75103	-1.122
MTS9	Yilgarn Craton	52.2833	0.704152	11.4943	9.80374	0.196748	13.4203	9.95133	0.818059	0.0103552	4224.91	197.341	[23005]		1338.93	0.910615	-1.099
81778	Yilgarn Craton	51.9804	0.647478	11.1892	9.98319	0.19222	9.71218	14.0321	0.890283	0.0809348	3884.87	220.883	[23005]		1353.87	1.01901	-1.063
ME-22	Yilgarn Craton	53.2453	1.0201	11.7812	10.4206	0.180018	9.0209	9.67097	3.12031	0.140014	6120.61	240.721	[23005]		1361.07	1.32482	-1.046
MTS4B	Yilgarn Craton	51.53	0.713994	12.7397	10.1922	0.234598	10.4345	10.3631	2.33578	0.0917993	4283.97	216.363	[23005]		1358.26	1.34869	-1.04
ME-23A	Yilgarn Craton	51.95	1.2	11.32	10.9979	0.19	10.21	9.78	2.76	0.13	7200	277.467	[23005]		1392.14	1.57598	-0.899
220210	Yilgarn Craton	48.7952	0.813253	12.8012	11.5692	0.190763	10.3916	12.0984	1.68675	0.160643	4879.52	317.89	[23005]		1433.82	2.05111	-0.713
MMD12-132	Yilgarn Craton	52.4081	0.590368	9.73589	10.8287	0.165717	15.6396	6.39047	2.68255	0.176075	3542.21	225.303	[23005]		1378.4	1.37827	-0.585
224940	Yilgarn Craton	52.9301	1.01869	11.2371	11.3071	0.199538	9.57782	8.19156	4.05377	0.031506	6112.16	281.517	[23005]		1395.91	1.6708	-0.568
MTS4A	Yilgarn Craton	52.423	0.689376	12.3378	9.67919	0.233171	10.1277	10.7766	2.39254	0.0608273	4136.25	214.916	[23005]		1334.84	1.13884	-0.563
MTS11	Yilgarn Craton	52.6402	0.709147	13.9789	9.33334	0.173461	9.20361	10.0301	2.66313	0.0306107	4254.88	214.343	[23005]		1321.38	1.10576	-0.463
MTS6	Yilgarn Craton	50.5685	0.724419	14.1262	9.2749	0.160982	8.6226	13.7338	1.54945	0.0100614	4346.51	224.546	[23005]		1331.85	1.149	-0.423
220213	Yilgarn Craton	53.0402	0.877281	11.9492	10.8118	0.19159	9.10558	10.6887	1.88565	0.0504185	5263.69	297.586	[23005]		1380.37	1.27883	-0.343
MTS8	Yilgarn Craton	51.63	0.794621	14.4356	9.57242	0.173187	8.79177	10.6051	2.64874	0.0509372	4767.73	238.264	[23005]		1336.19	1.27347	-0.197
MTS12	Yilgarn Craton	52.2249	0.728885	14.2005	9.38828	0.173301	8.84857	11.4175	1.72282	0.0305826	4373.31	227.013	[23005]		1324.76	1.02719	-0.181
MMD12-204B	Yilgarn Craton	52.6869	0.767694	12.4619	11.0418	0.147229	10.5164	6.85666	3.97518	0.11568	4606.16	301.728	[23005]		1382.54	1.59642	-0.177
MMD5-127	Yilgarn Craton	53.2845	0.68131	11.1857	11.084	0.152532	12.1009	5.95892	3.88448	0.233882	4087.86	282.458	[23005]		1381.24	1.50884	-0.149
MS55	Yilgarn Craton	53.7426	0.928003	11.7785	10.299	0.183561	8.68856	10.8097	2.16194	0.061187	5568.02	313.632	[23005]		1356.19	1.11844	-0.108
83534	Yilgarn Craton	53.6645	0.93259	11.8398	10.4088	0.182463	9.21439	9.40699	2.91941	0.0709579	5595.54	318.648	[23005]		1357.76	1.23402	-0.083
HB14	Yilgarn Craton	53.77	0.989695	10.8152	10.3043	0.163249	11.2233	7.00949	4.27507	0.10203	5938.17	323.793	[23005]		1350.22	1.33795	-0.015
MMD12-182	Yilgarn Craton	53.7341	0.738717	11.9915	11.2103	0.121433	10.9796	4.98887	4.62457	0.161911	4432.3	296.442	[23005]		1380.84	1.54271	0.034
HB12	Yilgarn Craton	52.9123	1.01433	10.4465	9.72332	0.198682	12.1301	8.16689	4.03639	0.0941127	6085.96	301.86	[23005]		1335.47	1.31129	0.047
MMD12-179	Yilgarn Craton	52.5979	0.736157	10.8823	10.3951	0.149365	10.7756	9.02593	3.83015	0.256055	4416.94	266.315	[23005]		1362.89	1.49533	0.108
MS52	Yilgarn Craton	52.2162	0.910747	11.8397	10.3999	0.17203	8.58126	12.6493	1.81137	0.050597	5464.48	342.016	[23005]		1368.08	1.25305	0.133
83540	Yilgarn Craton	53.46	0.934864	11.5639	10.3619	0.182908	9.36897	10.6188	2.08312	0.071131	5609.19	313.039	[23005]		1357.98	1.13481	0.139
225002	Yilgarn Craton	53.1313	0.717172	13.9899	8.98788	0.161616	8.64646	10.7576	2.31313	0.111111	4303.03	252.794	[23005]		1303.3	0.939206	0.14
83535	Yilgarn Craton	53.311	0.964859	12.2689	10.2662	0.192972	9.04936	9.30327	3.22974	0.0710949	5789.15	332.746	[23005]		1356.33	1.30456	0.199
83545	Yilgarn Craton	52.2456	0.53977	14.0136	9.20701	0.183318	9.45106	11.05	1.51747	0.61106	3238.62	238.781	[23005]		1314.23	1.01532	0.206
83538	Yilgarn Craton	52.5338	0.938825	12.0937	10.222	0.171613	8.67151	12.0129	1.94831	0.0706642	5632.95	323.424	[23005]		1358.48	1.19915	0.21
MS54	Yilgarn Craton	53.3925	0.815863	10.8437	10.3839	0.175565	10.2138	10.9987	1.735	0.082619	4895.18	311.687	[23005]		1358.71	1.08017	0.247
MMD5-108B	Yilgarn Craton	53.8241	0.758663	12.559	11.403	0.123026	9.39102	5.40291	4.54173	0.51261	4551.98	333.06	[23005]		1391.21	1.64572	0.259
83544	Yilgarn Craton	52.0835	0.774325	14.4677	9.33769	0.183393	9.27152	9.45492	3.0056	0.20377	4645.95	263.671	[23005]		1320.51	1.21761	0.293
83537	Yilgarn Craton	53.5912	0.946912	12.0077	10.1108	0.17125	8.7942	10.5772	2.3975	0.0805883	5681.47	329.354	[23005]		1350.24	1.13506	0.365
MS38	Yilgarn Craton	52.4218	0.766401	6.76477	9.91091	0.224811	13.6419	13.8463	1.04231	0.0919681	4598.41	306.622	[23005]		1354.97	0.899166	0.385
MS48	Yilgarn Craton	53.4241	0.907591	11.6543	10.4159	0.165017	9.11716	11.0355	1.85644	0.0515677	5445.54	337.952	[23005]		1361.9	1.12722	0.41
331/477	Yilgarn Craton	52.9582	0.628554	12.8504	9.72095	0.179587	9.51811	10.6455	1.87569	0.359174	3771.33	200	[7224]		1335.76	1.07715	-0.964
331/628	Yilgarn Craton	51.8051	0.591657	11.9735	10.2525	0.170477	13.2571	7.93221	1.73486	0.942639	3549.94	193	[7224]		1354.42	1.30611	-0.946
331/626	Yilgarn Craton	52.8549	0.628868	12.8968	9.96562	0.199641	10.541	9.08365	2.10621	0.409263	3773.21	208	[7224]		1342.14	1.15299	-0.294
178344	Yilgarn Craton	50.2508	0.532915	9.84326	10.0137	0.188088	17.4399	9.10136	1.23302	0.0940439	3197.49	180	[8808]		1366.15	1.28875	-1.269
165390	Yilgarn Craton	52.3158	0.998353	11.4245	10.7882	0.164677	9.88061	9.43804	3.42734	0.144092	5990.12	295	[8808]		1379.96	1.56141	-0.571
165367	Yilgarn Craton	53.1106	0.764558	9.40511	9.60813	0.157101	14.1286	6.71345	3.05823	1.79095	4587.35	256	[8808]		1325.56	1.29961	0.282
S106	Tanzania Craton	50.3597	0.749823	15.8071	9.82756	0.182389	8.70402	10.6394	2.21907	0.192522	4498.94	241	[13777]		1352.45	1.45179	-0.711
LH8	Tanzania Craton	48.3705	0.721645	14.565	12.4231	0.193116	8.55809	10.784	2.26657	0.5082	4329.87	272.83	[21179]		1469.78	2.56802	-1.62
K45	Tanzania Craton	48.663	0.646189	13.053	12.6228	0.178945	9.00687	12.2577	1.7298	0.208769	3877.13	263.11	[21179]		1480.37	2.48693	-1.164
R13	Tanzania Craton	49.1081	0.563871	16.1575	10.0803	0.18454	9.08345	11.6978	1.68136	0.102522	3383.23	234	[11635]		1367.77	1.57154	-0.35
R12	Tanzania Craton	49.5641	0.543646	15.8991	9.90289	0.205149	8.98554	11.8884	1.56939	0.12309	3261.87	232	[11635]		1358.83	1.45587	-0.098
R78	Tanzania Craton	52.7071	0.840853	14.0176	10.502	0.153815	8.92125	10.1518	1.22026	0.0922888	5045.12	268	[11635]		1365.38	1.15132	0.011
R69	Tanzania Craton	51.1777	0.741117	14.4162	10.6776	0.263959	8.8934	9.61421	2.56853	0.233503	4446.7	319	[11635]		1378.98	1.57985	0.046
Data from the GEOROC database
Reference
[10271]	Garde A. A. A Mid-Archaean Island Arc Complex In The Eastern Akia Terrane, Godthabsfjord, Southern West Greenland. J. Geol. Soc. London 164, 565-579 (2007).
[10442]	Hall R. P., Hughes D. J. & Friend C. R. L. Geochemical Evolution And Unusual Pyroxene Chemistry Of The Md Tholeiite Dyke Swarm From The Archaean Craton Of Southern West Greenland. J. Petrol. 26, 253-282 (1985).
[11346]	Polat A., Frei R., Appel P. W. U., Dilek Y., Fryer B. J., Ordonez-Calderon J. C. & Yang Zhiming. The Origin And Compositions Of Mesoarchean Oceanic Crust: Evidence From The 3075 Ma Ivisaartoq Greenstone Belt, Sw Greenland. Lithos 100, 293-321 (2008).
[11427]	Ordonez-Calderon J. C., Polat A., Fryer B. J., Gagnon J. E., Raith J. G. & Appel P. W. U. Evidence For Hfse And Ree Mobility During Calc-Silicate Metasomatism, Mesoarchean (~3075 Ma) Ivisaartoq Greenstone Belt, Southern West Greenland. Precambrian Res. 161, 317-340 (2008).
[11627]	Polat A., Appel P. W. U., Frei R., Pan Y., Dilek Y., Ordonez-Calderon J. C., Fryer B. J., Hollis J. A. & Raith J. G. Field And Geochemical Characteristics Of The Mesoarchean (~3075 Ma) Ivisaartoq Greenstone Belt, Southern West Greenland: Evidence For Seafloor Hydrothermal Alteration In Supra-Subduction Oceanic Crust. Gondwana Res. 11, 69-91 (2007).
[12271]	Naqvi S. M., Sarma D. S., Sawkar R. H., Mohan M. & Prathap J. G. Role Of Adakitic Magmatism And Subduction In Gold Environment Of Dharwar Neoarchaean Greenstone Belts, India. J. Geol. Soc. India. 71, 875-888 (2008).
[12751]	Goldstein S. B. & Francis D. M. The Petrogenesis And Mantle Source Of Archaean Ferropicrites From The Western Superior Province, Ontario, Canada. J. Petrol. 49, 1729-1753 (2008).
[12870]	Appel P. W. U., Polat A. & Frei R. Dacitic Ocelli In Mafic Lavas, 3.8-3.7 Ga Isua Greenstone Belt, West Greenland: Geochemical Evidence For Partial Melting Of Oceanic Crust And Magma Mixing. Chem. Geol. 258, 105-124 (2009).
[13002]	Fralick P., Hollings P., Metsaranta R. & Heaman L. M. Using Sediment Geochemistry And Detrital Zircon Geochronology To Categorize Eroded Igneous Units: An Example From The Mesoarchean Birch-Uchi Greenstone Belt, Superior Province. Precambrian Res. 168, 106-122 (2009).
[13224]	Manikyamba C., Kerrich R., Khanna T. C., Satyanarayanan M. & Krishna A. K. Enriched And Depleted Arc Basalts, With Mg-Andesites And Adakites: A Potential Paired Arc-Back-Arc Of The 2.6 Ga Hutti Greenstone Terrane, India. Geochim. Cosmochim. Acta 73, 1711-1736 (2009).
[13778]	Said N. & Kerrich R. Geochemistry Of Coexisting Depleted And Enriched Paringa Basalts, In The 2.7 Ga Kalgoorlie Terrane, Yilgarn Craton, Western Australia: Evidence For A Heterogeneous Mantle Plume Event. Precambrian Res. 174, 287-309 (2009).
[13799]	Ordonez-Calderon J. C., Polat A., Fryer B. J., Appel P. W. U., Van Gool J. A. M., Dilek Y. & Gagnon J. E. Geochemistry And Geodynamic Origin Of The Mesoarchean Ujarassuit And Ivisaartoq Greenstone Belts, Sw Greenland. Lithos 113, 133-157 (2009).
[13810]	Polat A., Frei R., Fryer B. J. & Appel P. W. U. The Origin Of Geochemical Trends And Eoarchean (Ca. 3700 Ma) Zircons In Mesoarchean (Ca. 3075 Ma) Ocelli-Hosting Pillow Basalts, Ivisaartoq Greenstone Belt, Sw Greenland: Evidence For Crustal Contamination Versus Crustal Recycling. Chem. Geol. 268, 248-271 (2009).
[13997]	Polat A., Appel P. W. U., Fryer B. J., Windley B. F., Frei R., Samson I. M. & Huang Hua. Trace Element Systematics Of The Neoarchean Fiskenset Anorthosite Complex And Associated Meta-Volcanic Rocks, Sw Greenland: Evidence For A Magmatic Arc Origin. Precambrian Res. 175, 87-115 (2009).
[14216]	Said N., Kerrich R. & Groves D. I. Geochemical Systematics Of Basalts Of The Lower Basalt Unit, 2.7 Ga Kambalda Sequence, Yilgarn Craton, Australia: Plume Impingement At A Rifted Craton Margin. Lithos 115, 82-100 (2010).
[14487]	Said N. & Kerrich R. Magnesian Dyke Suites Of The 2.7 Ga Kambalda Sequence, Western Australia: Evidence For Coeval Melting Of Plume Asthenosphere And Metasomatised Lithospheric Mantle. Precambrian Res. 180, 183-203 (2010).
[15563]	Polat A., Appel P. W. U. & Fryer B. J. An Overview Of The Geochemistry Of Eoarchean To Mesoarchean Ultramafic To Mafic Volcanic Rocks, Sw Greenland: Implications For Mantle Depletion And Petrogenetic Processes At Subduction Zones In The Early Earth. Gondwana Res. 20, 255-283 (2011).
[15680]	Hoffmann J. E., Mker C., Polat A., Rosing M. T. & Schulz T. The Origin Of Decoupled Hf-Nd Isotope Compositions In Eoarchean Rocks From Southern West Greenland. Geochim. Cosmochim. Acta 75, 6610-6628 (2011).
[15917]	Thebaud N., Barnes Stephen-J. & Fiorentini M. L. Komatiites Of The Wildara-Leonora Belt, Yilgarn Craton, Wa: The Missing Link In The Kalgoorlie Terrane? Precambrian Res. 196-197, 234-246 (2012).
[16158]	Szilas K., Hoffmann J. E., Schersten A., Rosing M. T., Windley B. F., Kokfelt T. F., Keulen N., Van Hinsberg V., Naeraa T., Frei R. & Mker C. Complex Calc-Alkaline Volcanism Recorded In Mesoarchaean Supracrustal Belts North Of Frederikshab Isblink, Southern West Greenland: Implications For Subduction Zone Processes In The Early Earth. Precambrian Res. 208-211, 90-123 (2012).
[16345]	Manikyamba C., Kerrich R., Polat A., Raju K., Satyanarayanan M. & Krishna A. K. Arc Picrite-Potassic Adakitic-Shoshonitic Volcanic Association Of The Neoarchean Sigegudda Greenstone Terrane, Western Dharwar Craton: Transition From Arc Wedge To Lithosphere Melting. Precambrian Res. 212-213, 207-224 (2012).
[16588]	Mare L. P. & Fourie C. J. S. New Geochemical And Palaeomagnetic Results From Neoarchaean Dyke Swarms In The Badplaas-Barberton Area, South Africa. S. Afr. J. Geol. 115, 145-170 (2012).
[16962]	Angerer T., Kerrich R. & Hagemann S. G. Geochemistry Of A Komatiitic, Boninitic, And Tholeiitic Basalt Association In The Mesoarchean Koolyanobbing Greenstone Belt, Southern Cross Domain, Yilgarn Craton: Implications For Mantle Sources And Geodynamic Setting Of Banded Iron Formation. Precambrian Res. 224, 110-128 (2013).
[17073]	Szilas K., Van Hinsberg V., Kisters A. F. M., Hoffmann J. E., Windley B. F., Kokfelt T. F., Schersten A., Frei R., Rosing M. T. & Mker C. Remnants Of Arc-Related Mesoarchaean Oceanic Crust In The Tartoq Group Of Sw Greenland. Gondwana Res. 23, 436-451 (2013).
[17629]	Manikyamba C., Kerrich R., Polat A. & Saha A. Geochemistry Of Two Stratigraphically-Related Ultramafic (Komatiite) Layers From The Neoarchean Sigegudda Greenstone Terrane, Western Dharwar Craton, India: Evidence For Compositional Diversity In Archean Mantle Plumes. Lithos 177, 120-135 (2013).
[18456]	Parks Jen, Lin Shoufa, Davis D. W., Yang Xueming, Creaser R. A. & Corkery M. T. Meso- And Neoarchean Evolution Of The Island Lake Greenstone Belt And The Northwestern Superior Province: Evidence From Lithogeochemistry, Nd Isotope Data, And U-Pb Zircon Geochronology. Precambrian Res. 246, 16 (2014).
[18733]	Kitayama Y. C. & Francis D. M. Iron-Rich Alkaline Magmatism In The Archean Wawa Greenstone Belts (Ontario, Canada). Precambrian Res. 252, 53-70 (2014).
[19258]	Khanna T. C., Sai V. V. S., Bizimis M. & Krishna A. K.: Petrogenesis Of Basalt-High-Mg Andesite-Adakite In The Neoarchean Veligallu Greenstone Terrane: Geochemical Evidence For A Rifted Back-Arc Crust In The Eastern Dharwar Craton, India. Precambrian Res. 25, 260-277 (2015).
[19865]	Hayman P. C. et al. Evolution Of A ~2.7 Ga Large Igneous Province: A Volcanological, Geochemical And Geochronological Study Of The Agnew Greenstone Belt, And New Regional Correlations For The Kalgoorlie Terrane (Yilgarn Craton, Western Australia). Precambrian Res. 270, 334-368 (2015).
[20907]	Tappe S., Romer R. L., Stracke A., Steenfelt A., Smart K. A., Muehlenbachs K. & Torsvik T. H. Sources And Mobility Of Carbonate Melts Beneath Cratons, With Implications For Deep Carbon Cycling, Metasomatism And Rift Initiation. Earth Planet. Sci. Lett. 466, 152-167 (2017).
[21872]	Lowrey J. R., Ivanic T. J., Wyman D. A. & Roberts M. P. Platy Pyroxene: New Insights Into Spinifex Texture. J. Petrol. 58, 1671-1700 (2017).
[22276]	Dey S., Pal S., Balakrishnan S., Halla J., Kurhila M. & Heilimo E. Both Plume And Arc: Origin Of Neoarchaean Crust As Recorded In Veligallu Greenstone Belt, Dharwar Craton, India. Precambrian Res. 314, 41-61 (2018).
[22697]	Sotiriou P., Polat A. & Frei R. Petrogenesis And Geodynamic Setting Of The Neoarchaean Haines Gabbroic Complex And Shebandowan Greenstone Belt, Southwestern Superior Province, Ontario, Canada. Lithos 324-325, 1-19 (2019).
[22846]	Huber M. S. & Byerly G. R. Volcanological And Petrogenetic Characteristics Of Komatiites Of The 3.3 Ga Saw Mill Complex, Weltevreden Formation, Barberton Greenstone Belt, South Africa. S. Afr. J. Geol. 121, 463-486 (2019).
[22864]	Giri A., Anand R., Balakrishnan S., Dash J. K. & Sarma D. S. Neoarchean Magmatism In Shimoga Greenstone Belt, India: Evidence For Subduction-Accretion Processes In The Evolution Of The Western Dharwar Stratigraphy. Lithos 330-331, 177-193 (2019).
[22867]	Singh P. K., Verma S. K., Moreno J. A., Singh V. K., Malviya V. P., Oliveira E. P., Mishra S. & Arima M. Geochemistry And Sm-Nd Isotope Systematics Of Mafic-Ultramafic Rocks From The Babina And Mauranipur Greenstone Belts, Bundelkhand Craton, India: Implications For Tectonic Setting And Paleoarchean Mantle Evolution. Lithos 330-331, 90-101 (2019).
[23005]	Wyman D. A. 2.8 Ga Subduction-Related Magmatism In The Youanmi Terrane And A Revised Geodynamic Model For The Yilgarn Craton. Precambrian Res. 327, 14-33 (2019).
[23015]	Wasilewski B., O^Neil J. & Rizo H. Geochemistry And Petrogenesis Of The Early Archean Mafic Crust From The Saglek-Hebron Complex (Northern Labrador). Precambrian Res. 328, 321-343 (2019).
[23081]	Hoffmann J. E., Mker C., Naeraa T., Rosing M. T., Herwartz D., Garbe-Schberg D. & Svahnberg H. Mechanisms Of Archean Crust Formation Inferred From High-Precision Hfse Systematics In Ttgs. Geochim. Cosmochim. Acta 75, 4157-4178 (2011).
[5196]	Barrie C. T., Corfu F., Davis P., Coutts A. C. & Maceachern D. Geochemistry Of The Dundonald Komatiite-Basalt Suite And Genesis Of Dundeal Ni Deposit, Abitibi Subprovince, Canada. Econ. Geol. 94, 845-866 (1999).
[5198]	Polat A., Kerrich R. & Wyman D. A. Geochemical Diversity In Oceanic Komatiites And Basalts From The Late Archean Wawa Greenstone Belts, Superior Province, Canada: Trace Element And Nd Isotope Evidence For A Heterogeneous Mantle. Precambrian Res. 94, 139-173 (1999).
[5306]	Skulski T. & Percival J. A. Allochthonous 2.78 Ga Oceanic Plateau Slivers In A 2.72 Ga Continental Arc Sequence; Vizien Greenstone Belt, Northeastern Superior Province, Canada. Lithos 37, 163-179 (1996).
[5321]	Riganti A. & Wilson A. H. Geochemistry Of The Mafic/Ultramafic Volcanic Associations Of The Nondweni Greenstone Belt, South Africa, And Constraints On Their Petrogenesis. Lithos 34, 235-252 (1995).
[5524]	Tomlinson K. Y., Davis D. W., Percival J. A., Hughes D. J. & Thurston P. C. Mafic To Felsic Magmatism And Crustal Recycling In The Obonga Lake Greenstone Belt, Western Superior Province: Evidence From Geochemistry, Nd Isotopes And U-Pb Geochronology. Precambrian Res. 114, 295-325 (2002).
[5575]	Polat A. & Kerrich R. Archean Greenstone Belt Magmatism And The Continental Growth-Mantle Evolution Connection: Constraints From Th-U-Nb-Lree Systematics Of The 2.7 Ga Wawa Subprovince, Superior Province, Canada. Earth Planet. Sci. Lett. 175, 41-54 (2000).
[5579]	Arndt N. T. & Nesbitt R. W. Magma Mixing In Komatiitic Lavas From Munro Township, Ontario. (Archean Geochemistry, Springer, Berlin, 1984)
[5672]	Polat A., Kerrich R. & Wyman D. A. The Late Archean Schreiber-Hemlo And White River-Dayohessarah Greenstone Belts, Superior Province: Collages Of Oceanic Plateaus, Oceanic Arcs, And Subduction-Accretion Complexes. Tectonophysics 289, 295-326 (1998).
[5684]	Hanuma Prasad M., Krishna Rao B., Vasudev V. N., Srinavasan R. & Balaram V. Geochemistry Of Archean Bimodal Volcanic Rocks Of The Sandur Supracrustal Belt, Dharwar Craton, Southern India. J. Geol. Soc. India. 49, 307-322 (1997).
[5746]	Tomlinson K. Y., Hughes D. J., Thurston P. C. & Hall R. P. Plume Magmatism And Crustal Growth At 2.9 To 3.0 Ga In The Steep Rock And Lumby Lake Area, Western Superior Province. Lithos 46, 103-136 (1999).
[5748]	Messenger P. R. Geochemistry Of The Yandal Belt Metavolcanic Rocks, Eastern Goldfields Province, Western Australia. Austr. J. Earth Sci. 47, 1015-1028 (2000).
[5755]	Kerrich R., Polat A., Wyman D. A. & Hollings P. Trace Element Systematics Of Mg-, To Fe-Tholeiitic Basalt Suites Of The Superior Province: Implications For Archean Mantle Reservoirs And Greenstone Belt Genesis. Lithos 46, 163-187 (1999).
[5823]	Sage R. P., Lightfoot P. C. & Doherty W. Bimodal Cyclic Archean Basalts And Rhyolites From The Michipicoten (Wawa) Greenstone Belt, Ontario: Geochemical Evidence For Magma Contributions From The Asthenospheric Mantle And Ancient Continental Lithosphere Near The Southern Margin Of The Superior Province.
[5844]	Dostal J. & Mueller W. U. Archean Shoshonites From The Abitibi Greenstone Belt, Chibougamu/Quebec, Canada): Geochemistry And Tectonic Setting. J. Volcanol. Geotherm. Res. 53, 145-165 (1992).
[5847]	La Fleche M. R., Dupuy C. & Bougault H. Geochemistry And Petrogenesis Of Archean Mafic Volcanic Rocks Of The Southern Abitibi Belt, Quebec. Precambrian Res. 57, 207-241 (1992).
[6045]	Garde A. A. Accretion And Evolution Of An Archean High-Grade Grey Gneiss-Amphibolite Complex: The Fiskefjord Area, Southern West Greenland. Bull. Geol. Greenland Surv. 177, 1-114 (1997).
[7098]	Thurston P. C. & Fryer B. J. The Geochemistry Of Repetitive Cyclical Volcanism From Basalt Through Rhyolite In The Uchi-Confederation Greenstone Belt, Canada. Contrib. Mineral. Petrol. 83, 204-226 (1983).
[7161]	Sproule R. A., Lesher C. M., Ayer J. A., Thurston P. C. & Herzberg C. T. Spatial And Temporal Variations In The Geochemistry Of Komatiites And Komatiitic Basalts In The Abitibi Greenstone Belt. Precambrian Res. 115, 153-186 (2002).
[7218]	Hollings P. & Kerrich R. An Archean Arc Basalt-Nb-Enriched Basalt-Adakite Association: The 2.7 Ga Confederation Assemblage Of The Birch-Uchi Greenstone Belt, Superior Province. Contrib. Mineral. Petrol. 139, 208-226 (2000).
[7224]	Sun Shen-Su, Nesbitt R. W. & Mcculloch M. T. Geochemistry And Petrogenesis Of Archean And Early Proterozoic Siliceous High-Magnesian Basalts. (Crawford, A. J. (Ed.), Boninites,Unwin Hyman, London, 1989)
[7552]	Polat A. & Hofmann A. W. Alteration And Geochemical Patterns In The 3.7-3.8 Ga Isua Greenstone Belt, West Greenland. Prec. Research 126, 197-218 (2003).
[8808]	Chen Shu-Min, Morris P. A. & Pirajno F. Occurrence Of Komatiites In The Sandstone Greenstone Belt, North-Central Yilgarn Craton. Austr. J. Earth Sci. 52, 959-963 (2005).
[9142]	Picard C. P. & Piboule M. Prologie Des Roches Volcaniques Du Sillon De Roches Vertes Archnnes De Matagami - Chibougamu LOuest De Chapais (Abitibi Est, Quec). 2. Le Groupe Hautement Potassique DOpisca. Can. J. Earth Sci. 23, 1169-1189 (1986).
[9150]	Hollings P. & Kerrich R. Light Rare Earth Element Depleted To Enriched Basaltic Flows From 2.8 To 2.7 Ga Greenstone Belts Of The Uchi Subprovince, Ontario, Canada. Chem. Geol. 227, 133-153 (2006).
[9441]	Naqvi S. M., Khan R. M. K., Manikyamba C., Ram Mohan M. & Khanna T. C. Geochemistry Of The Neo-Archaean High-Mg Basalts, Boninites And Adakites From The Kushtagi-Hungund Greenstone Belt Of The Eastern Dharwar Craton (Edc); Implications For The Tectonic Setting. J. Asian Earth Sci. 27, 25-44 (2006).
[9713]	Marshall B. & Schoenwandt H. K. An Archaean Sill Complex And Associated Supracrustal Rocks, Arveprinsen Ejland, North-East Disko Bugt, West Greenland. Bull. Geol. Greenland Surv. 181, 87-102 (1999).
[13224]	Manikyamba C., Kerrich R., Khanna T. C., Satyanarayanan M. & Krishna A. K. Enriched And Depleted Arc Basalts, With Mg-Andesites And Adakites: A Potential Paired Arc-Back-Arc Of The 2.6 Ga Hutti Greenstone Terrane, India. Geochim. Cosmochim. Acta 73, 1711-1736 (2009).
[14137]	Smithies R. H., Van Kranendonk M. J. & Champion D. C. It Started With A Plume-Early Archean Basaltic Proto-Continental Crust. Earth Planet. Sci. Lett. 238, 284-297 (2005).
[24590]	Manikyamba, C. et al. Tectonic juxtaposition of plume and subduction derived magmatic sequences in the Bababudan greenstone terrane, western Dharwar Craton, India: Constraining crustal accretion processes in a Neoarchean subduction-collision orogeny. Precambrian Research 355 (2021).
[23987]	Agangi, A. et al. The Mesoarchaean Dominion Group and the onset of intracontinental volcanism on the Kaapvaal craton – Geological, geochemical and temporal constraints. Gondwana Research 84, 131-150 (2020).
[23666]	Lenhardt, N., Bleeker, W., Ngwa, C. N. & Aucamp, T. Shallow marine basaltic volcanism of the Machadodorp Member (Silverton Formation, Pretoria Group), Transvaal Basin, South Africa-An example of Paleoproterozoic explosive intraplate volcanic activity in an epeiric embayment. Precambrian Research 338 (2020).
[24984]	Murphy, D. et al. Combined Sm-Nd, Lu-Hf, and 142Nd study of Paleoarchean basalts from the East Pilbara Terrane, Western Australia. Chemical Geology 578(2021).
[24900]	Tympel, J. F. et al. Mantle-like Hf Nd isotope signatures in ~3.5 Ga greenstones: No evidence for Hadean crust beneath the East Pilbara Craton. Chemical Geology 576 (2021).
[24725]	Murphy, D. T. et al. Paleoarchean variole-bearing metabasalts from the East Pilbara Terrane formed by hydrous fluid phase exsolution and implications for Archean greenstone belt magmatic processes. Precambrian Research 357 (2021).
[13777]	Mtoro M., Maboko M. A. H. & Manya S. Geochemistry And Geochronology Of The Bimodal Volcanic Rocks Of The Suguti Area In The Southern Part Of The Musoma-Mara Greenstone Belt, Northern Tanzania. Precambrian Res. 174, 241-257 (2009).
[21179]	Cook Y. A., Sanislav I. V., Hammerli J., Blenkinsop T. G. & Dirks P. H. G. M. A Primitive Mantle Source For The Neoarchean Mafic Rocks From The Tanzania Craton. Geosci. Front. 7, 911-926 (2016).
[11635]	Manya S. Geochemistry And Petrogenesis Of Volcanic Rocks Of The Neoarchaean Sukumaland Greenstone Belt, Northwestern Tanzania. J. Afr. Earth Sci. 40, 269-279 (2004).
